# Supplementary material
Source: publisher figshare collection journal article supplement (https://gsajournals.figshare.com/ndownloader/files/12778412)
Supplement: Supplementary file 1 [file 12778412]

## Sheet: A) OL1.0 Results Updated
Ensembl (6404)	Homologene (4127)	InParanoid (5591)	OrthoMCL (5663)
WBGene00000001	WBGene00000001	WBGene00000001	WBGene00000001
WBGene00000002	WBGene00000002	WBGene00000002	WBGene00000002
WBGene00000003	WBGene00000003	WBGene00000004	WBGene00000003
WBGene00000004	WBGene00000004	WBGene00000018	WBGene00000004
WBGene00000018	WBGene00000020	WBGene00000020	WBGene00000018
WBGene00000020	WBGene00000022	WBGene00000022	WBGene00000020
WBGene00000022	WBGene00000035	WBGene00000035	WBGene00000022
WBGene00000023	WBGene00000039	WBGene00000039	WBGene00000023
WBGene00000035	WBGene00000040	WBGene00000040	WBGene00000035
WBGene00000036	WBGene00000041	WBGene00000041	WBGene00000036
WBGene00000037	WBGene00000058	WBGene00000058	WBGene00000039
WBGene00000038	WBGene00000060	WBGene00000060	WBGene00000040
WBGene00000039	WBGene00000063	WBGene00000063	WBGene00000041
WBGene00000040	WBGene00000064	WBGene00000064	WBGene00000055
WBGene00000041	WBGene00000065	WBGene00000065	WBGene00000060
WBGene00000042	WBGene00000066	WBGene00000066	WBGene00000063
WBGene00000043	WBGene00000067	WBGene00000068	WBGene00000064
WBGene00000044	WBGene00000068	WBGene00000071	WBGene00000065
WBGene00000046	WBGene00000069	WBGene00000072	WBGene00000066
WBGene00000048	WBGene00000071	WBGene00000074	WBGene00000067
WBGene00000049	WBGene00000072	WBGene00000075	WBGene00000068
WBGene00000050	WBGene00000074	WBGene00000080	WBGene00000069
WBGene00000053	WBGene00000075	WBGene00000081	WBGene00000071
WBGene00000054	WBGene00000080	WBGene00000086	WBGene00000072
WBGene00000055	WBGene00000081	WBGene00000089	WBGene00000073
WBGene00000056	WBGene00000086	WBGene00000092	WBGene00000074
WBGene00000057	WBGene00000089	WBGene00000095	WBGene00000075
WBGene00000058	WBGene00000090	WBGene00000096	WBGene00000080
WBGene00000059	WBGene00000092	WBGene00000097	WBGene00000081
WBGene00000060	WBGene00000095	WBGene00000099	WBGene00000086
WBGene00000061	WBGene00000097	WBGene00000101	WBGene00000089
WBGene00000062	WBGene00000099	WBGene00000102	WBGene00000090
WBGene00000063	WBGene00000101	WBGene00000103	WBGene00000092
WBGene00000064	WBGene00000102	WBGene00000106	WBGene00000093
WBGene00000065	WBGene00000103	WBGene00000107	WBGene00000095
WBGene00000066	WBGene00000105	WBGene00000108	WBGene00000096
WBGene00000067	WBGene00000106	WBGene00000109	WBGene00000097
WBGene00000068	WBGene00000107	WBGene00000110	WBGene00000099
WBGene00000069	WBGene00000108	WBGene00000111	WBGene00000101
WBGene00000070	WBGene00000109	WBGene00000112	WBGene00000102
WBGene00000072	WBGene00000110	WBGene00000113	WBGene00000103
WBGene00000074	WBGene00000111	WBGene00000114	WBGene00000105
WBGene00000075	WBGene00000112	WBGene00000115	WBGene00000106
WBGene00000080	WBGene00000113	WBGene00000116	WBGene00000107
WBGene00000081	WBGene00000114	WBGene00000117	WBGene00000108
WBGene00000086	WBGene00000115	WBGene00000120	WBGene00000109
WBGene00000089	WBGene00000116	WBGene00000121	WBGene00000110
WBGene00000090	WBGene00000117	WBGene00000122	WBGene00000111
WBGene00000092	WBGene00000118	WBGene00000123	WBGene00000112
WBGene00000093	WBGene00000123	WBGene00000137	WBGene00000113
WBGene00000095	WBGene00000137	WBGene00000139	WBGene00000114
WBGene00000096	WBGene00000140	WBGene00000140	WBGene00000115
WBGene00000097	WBGene00000142	WBGene00000142	WBGene00000116
WBGene00000098	WBGene00000147	WBGene00000143	WBGene00000117
WBGene00000099	WBGene00000148	WBGene00000145	WBGene00000118
WBGene00000100	WBGene00000149	WBGene00000147	WBGene00000121
WBGene00000101	WBGene00000150	WBGene00000148	WBGene00000122
WBGene00000102	WBGene00000155	WBGene00000149	WBGene00000123
WBGene00000103	WBGene00000157	WBGene00000155	WBGene00000137
WBGene00000107	WBGene00000158	WBGene00000157	WBGene00000140
WBGene00000108	WBGene00000159	WBGene00000158	WBGene00000142
WBGene00000109	WBGene00000160	WBGene00000159	WBGene00000143
WBGene00000110	WBGene00000161	WBGene00000160	WBGene00000147
WBGene00000111	WBGene00000162	WBGene00000161	WBGene00000148
WBGene00000112	WBGene00000163	WBGene00000162	WBGene00000149
WBGene00000113	WBGene00000164	WBGene00000164	WBGene00000150
WBGene00000114	WBGene00000165	WBGene00000165	WBGene00000155
WBGene00000115	WBGene00000166	WBGene00000166	WBGene00000157
WBGene00000116	WBGene00000169	WBGene00000170	WBGene00000158
WBGene00000117	WBGene00000170	WBGene00000171	WBGene00000159
WBGene00000118	WBGene00000171	WBGene00000172	WBGene00000160
WBGene00000123	WBGene00000172	WBGene00000174	WBGene00000161
WBGene00000137	WBGene00000173	WBGene00000175	WBGene00000162
WBGene00000139	WBGene00000174	WBGene00000177	WBGene00000163
WBGene00000140	WBGene00000175	WBGene00000178	WBGene00000164
WBGene00000142	WBGene00000180	WBGene00000180	WBGene00000165
WBGene00000143	WBGene00000181	WBGene00000181	WBGene00000166
WBGene00000144	WBGene00000182	WBGene00000182	WBGene00000170
WBGene00000145	WBGene00000183	WBGene00000183	WBGene00000171
WBGene00000146	WBGene00000184	WBGene00000184	WBGene00000172
WBGene00000147	WBGene00000187	WBGene00000187	WBGene00000174
WBGene00000148	WBGene00000188	WBGene00000188	WBGene00000175
WBGene00000149	WBGene00000189	WBGene00000189	WBGene00000176
WBGene00000150	WBGene00000190	WBGene00000192	WBGene00000177
WBGene00000155	WBGene00000192	WBGene00000193	WBGene00000180
WBGene00000156	WBGene00000193	WBGene00000195	WBGene00000181
WBGene00000157	WBGene00000195	WBGene00000197	WBGene00000182
WBGene00000158	WBGene00000197	WBGene00000198	WBGene00000183
WBGene00000159	WBGene00000198	WBGene00000199	WBGene00000184
WBGene00000160	WBGene00000199	WBGene00000200	WBGene00000187
WBGene00000161	WBGene00000201	WBGene00000201	WBGene00000188
WBGene00000162	WBGene00000203	WBGene00000203	WBGene00000189
WBGene00000163	WBGene00000204	WBGene00000205	WBGene00000192
WBGene00000164	WBGene00000208	WBGene00000206	WBGene00000193
WBGene00000165	WBGene00000211	WBGene00000207	WBGene00000195
WBGene00000166	WBGene00000212	WBGene00000208	WBGene00000197
WBGene00000169	WBGene00000213	WBGene00000209	WBGene00000198
WBGene00000170	WBGene00000217	WBGene00000210	WBGene00000199
WBGene00000171	WBGene00000224	WBGene00000212	WBGene00000200
WBGene00000172	WBGene00000225	WBGene00000217	WBGene00000201
WBGene00000173	WBGene00000227	WBGene00000222	WBGene00000202
WBGene00000174	WBGene00000228	WBGene00000223	WBGene00000203
WBGene00000175	WBGene00000229	WBGene00000224	WBGene00000204
WBGene00000176	WBGene00000230	WBGene00000225	WBGene00000205
WBGene00000181	WBGene00000232	WBGene00000228	WBGene00000206
WBGene00000182	WBGene00000233	WBGene00000229	WBGene00000207
WBGene00000183	WBGene00000235	WBGene00000230	WBGene00000208
WBGene00000184	WBGene00000240	WBGene00000231	WBGene00000209
WBGene00000187	WBGene00000241	WBGene00000235	WBGene00000210
WBGene00000188	WBGene00000242	WBGene00000236	WBGene00000211
WBGene00000189	WBGene00000244	WBGene00000240	WBGene00000212
WBGene00000190	WBGene00000247	WBGene00000241	WBGene00000213
WBGene00000192	WBGene00000248	WBGene00000242	WBGene00000216
WBGene00000193	WBGene00000253	WBGene00000244	WBGene00000217
WBGene00000195	WBGene00000254	WBGene00000246	WBGene00000222
WBGene00000196	WBGene00000257	WBGene00000247	WBGene00000224
WBGene00000197	WBGene00000266	WBGene00000251	WBGene00000225
WBGene00000198	WBGene00000269	WBGene00000252	WBGene00000226
WBGene00000199	WBGene00000271	WBGene00000253	WBGene00000227
WBGene00000200	WBGene00000276	WBGene00000256	WBGene00000228
WBGene00000201	WBGene00000279	WBGene00000257	WBGene00000229
WBGene00000202	WBGene00000280	WBGene00000265	WBGene00000230
WBGene00000203	WBGene00000281	WBGene00000266	WBGene00000231
WBGene00000204	WBGene00000283	WBGene00000269	WBGene00000232
WBGene00000205	WBGene00000289	WBGene00000270	WBGene00000233
WBGene00000206	WBGene00000292	WBGene00000271	WBGene00000235
WBGene00000207	WBGene00000293	WBGene00000274	WBGene00000236
WBGene00000208	WBGene00000294	WBGene00000276	WBGene00000240
WBGene00000209	WBGene00000295	WBGene00000277	WBGene00000242
WBGene00000210	WBGene00000296	WBGene00000279	WBGene00000244
WBGene00000211	WBGene00000298	WBGene00000280	WBGene00000246
WBGene00000212	WBGene00000366	WBGene00000283	WBGene00000247
WBGene00000213	WBGene00000368	WBGene00000289	WBGene00000248
WBGene00000214	WBGene00000369	WBGene00000292	WBGene00000249
WBGene00000215	WBGene00000372	WBGene00000293	WBGene00000253
WBGene00000217	WBGene00000373	WBGene00000294	WBGene00000254
WBGene00000218	WBGene00000375	WBGene00000295	WBGene00000257
WBGene00000219	WBGene00000376	WBGene00000298	WBGene00000259
WBGene00000220	WBGene00000377	WBGene00000301	WBGene00000262
WBGene00000222	WBGene00000378	WBGene00000366	WBGene00000265
WBGene00000224	WBGene00000379	WBGene00000367	WBGene00000266
WBGene00000225	WBGene00000380	WBGene00000368	WBGene00000269
WBGene00000226	WBGene00000381	WBGene00000369	WBGene00000270
WBGene00000227	WBGene00000382	WBGene00000371	WBGene00000271
WBGene00000228	WBGene00000383	WBGene00000372	WBGene00000274
WBGene00000229	WBGene00000390	WBGene00000375	WBGene00000276
WBGene00000230	WBGene00000393	WBGene00000376	WBGene00000277
WBGene00000231	WBGene00000396	WBGene00000377	WBGene00000280
WBGene00000232	WBGene00000403	WBGene00000378	WBGene00000281
WBGene00000233	WBGene00000405	WBGene00000379	WBGene00000282
WBGene00000235	WBGene00000406	WBGene00000380	WBGene00000283
WBGene00000236	WBGene00000407	WBGene00000381	WBGene00000289
WBGene00000238	WBGene00000408	WBGene00000382	WBGene00000292
WBGene00000240	WBGene00000409	WBGene00000383	WBGene00000293
WBGene00000242	WBGene00000410	WBGene00000387	WBGene00000294
WBGene00000244	WBGene00000415	WBGene00000388	WBGene00000295
WBGene00000246	WBGene00000416	WBGene00000390	WBGene00000296
WBGene00000247	WBGene00000417	WBGene00000391	WBGene00000298
WBGene00000248	WBGene00000419	WBGene00000392	WBGene00000301
WBGene00000249	WBGene00000422	WBGene00000393	WBGene00000366
WBGene00000250	WBGene00000424	WBGene00000397	WBGene00000367
WBGene00000253	WBGene00000426	WBGene00000399	WBGene00000368
WBGene00000254	WBGene00000435	WBGene00000403	WBGene00000369
WBGene00000257	WBGene00000437	WBGene00000405	WBGene00000371
WBGene00000259	WBGene00000443	WBGene00000407	WBGene00000372
WBGene00000262	WBGene00000451	WBGene00000408	WBGene00000375
WBGene00000266	WBGene00000452	WBGene00000409	WBGene00000376
WBGene00000267	WBGene00000454	WBGene00000410	WBGene00000377
WBGene00000270	WBGene00000463	WBGene00000413	WBGene00000378
WBGene00000271	WBGene00000464	WBGene00000414	WBGene00000379
WBGene00000275	WBGene00000466	WBGene00000415	WBGene00000380
WBGene00000276	WBGene00000476	WBGene00000416	WBGene00000381
WBGene00000277	WBGene00000478	WBGene00000417	WBGene00000382
WBGene00000279	WBGene00000479	WBGene00000419	WBGene00000383
WBGene00000280	WBGene00000480	WBGene00000420	WBGene00000386
WBGene00000281	WBGene00000481	WBGene00000422	WBGene00000387
WBGene00000282	WBGene00000482	WBGene00000424	WBGene00000388
WBGene00000283	WBGene00000484	WBGene00000426	WBGene00000390
WBGene00000292	WBGene00000485	WBGene00000428	WBGene00000391
WBGene00000293	WBGene00000490	WBGene00000431	WBGene00000392
WBGene00000294	WBGene00000491	WBGene00000435	WBGene00000393
WBGene00000295	WBGene00000492	WBGene00000437	WBGene00000396
WBGene00000298	WBGene00000498	WBGene00000438	WBGene00000397
WBGene00000301	WBGene00000499	WBGene00000439	WBGene00000403
WBGene00000366	WBGene00000500	WBGene00000441	WBGene00000405
WBGene00000367	WBGene00000501	WBGene00000443	WBGene00000406
WBGene00000368	WBGene00000502	WBGene00000445	WBGene00000407
WBGene00000369	WBGene00000503	WBGene00000447	WBGene00000408
WBGene00000371	WBGene00000506	WBGene00000448	WBGene00000409
WBGene00000372	WBGene00000508	WBGene00000449	WBGene00000410
WBGene00000373	WBGene00000510	WBGene00000451	WBGene00000411
WBGene00000375	WBGene00000515	WBGene00000452	WBGene00000413
WBGene00000376	WBGene00000518	WBGene00000454	WBGene00000414
WBGene00000377	WBGene00000519	WBGene00000463	WBGene00000415
WBGene00000378	WBGene00000530	WBGene00000464	WBGene00000416
WBGene00000379	WBGene00000531	WBGene00000466	WBGene00000417
WBGene00000380	WBGene00000532	WBGene00000473	WBGene00000419
WBGene00000381	WBGene00000533	WBGene00000475	WBGene00000420
WBGene00000383	WBGene00000536	WBGene00000476	WBGene00000421
WBGene00000386	WBGene00000539	WBGene00000478	WBGene00000422
WBGene00000387	WBGene00000540	WBGene00000479	WBGene00000426
WBGene00000388	WBGene00000541	WBGene00000480	WBGene00000428
WBGene00000389	WBGene00000542	WBGene00000481	WBGene00000429
WBGene00000390	WBGene00000543	WBGene00000482	WBGene00000430
WBGene00000391	WBGene00000544	WBGene00000483	WBGene00000431
WBGene00000392	WBGene00000545	WBGene00000484	WBGene00000433
WBGene00000393	WBGene00000546	WBGene00000490	WBGene00000435
WBGene00000397	WBGene00000547	WBGene00000491	WBGene00000437
WBGene00000403	WBGene00000549	WBGene00000492	WBGene00000438
WBGene00000405	WBGene00000550	WBGene00000493	WBGene00000439
WBGene00000406	WBGene00000551	WBGene00000498	WBGene00000443
WBGene00000407	WBGene00000552	WBGene00000499	WBGene00000445
WBGene00000408	WBGene00000553	WBGene00000500	WBGene00000447
WBGene00000409	WBGene00000554	WBGene00000501	WBGene00000451
WBGene00000410	WBGene00000561	WBGene00000502	WBGene00000452
WBGene00000411	WBGene00000565	WBGene00000503	WBGene00000453
WBGene00000412	WBGene00000566	WBGene00000506	WBGene00000454
WBGene00000413	WBGene00000567	WBGene00000507	WBGene00000458
WBGene00000416	WBGene00000583	WBGene00000508	WBGene00000463
WBGene00000417	WBGene00000585	WBGene00000510	WBGene00000464
WBGene00000419	WBGene00000591	WBGene00000515	WBGene00000466
WBGene00000420	WBGene00000674	WBGene00000517	WBGene00000468
WBGene00000421	WBGene00000761	WBGene00000518	WBGene00000469
WBGene00000422	WBGene00000762	WBGene00000519	WBGene00000472
WBGene00000424	WBGene00000763	WBGene00000520	WBGene00000474
WBGene00000425	WBGene00000764	WBGene00000521	WBGene00000476
WBGene00000426	WBGene00000765	WBGene00000527	WBGene00000478
WBGene00000428	WBGene00000766	WBGene00000530	WBGene00000479
WBGene00000429	WBGene00000767	WBGene00000532	WBGene00000480
WBGene00000430	WBGene00000768	WBGene00000533	WBGene00000481
WBGene00000431	WBGene00000773	WBGene00000534	WBGene00000482
WBGene00000432	WBGene00000774	WBGene00000535	WBGene00000484
WBGene00000433	WBGene00000776	WBGene00000536	WBGene00000485
WBGene00000435	WBGene00000778	WBGene00000537	WBGene00000490
WBGene00000436	WBGene00000787	WBGene00000539	WBGene00000491
WBGene00000437	WBGene00000788	WBGene00000540	WBGene00000492
WBGene00000438	WBGene00000793	WBGene00000541	WBGene00000493
WBGene00000439	WBGene00000794	WBGene00000542	WBGene00000498
WBGene00000440	WBGene00000796	WBGene00000543	WBGene00000499
WBGene00000441	WBGene00000798	WBGene00000545	WBGene00000500
WBGene00000443	WBGene00000799	WBGene00000546	WBGene00000501
WBGene00000445	WBGene00000800	WBGene00000547	WBGene00000502
WBGene00000446	WBGene00000802	WBGene00000549	WBGene00000503
WBGene00000447	WBGene00000812	WBGene00000550	WBGene00000506
WBGene00000448	WBGene00000814	WBGene00000552	WBGene00000507
WBGene00000449	WBGene00000817	WBGene00000553	WBGene00000508
WBGene00000450	WBGene00000818	WBGene00000554	WBGene00000510
WBGene00000451	WBGene00000822	WBGene00000561	WBGene00000515
WBGene00000452	WBGene00000830	WBGene00000564	WBGene00000518
WBGene00000453	WBGene00000831	WBGene00000565	WBGene00000519
WBGene00000457	WBGene00000832	WBGene00000566	WBGene00000520
WBGene00000458	WBGene00000833	WBGene00000567	WBGene00000528
WBGene00000461	WBGene00000834	WBGene00000583	WBGene00000529
WBGene00000464	WBGene00000836	WBGene00000584	WBGene00000530
WBGene00000466	WBGene00000837	WBGene00000585	WBGene00000531
WBGene00000468	WBGene00000838	WBGene00000591	WBGene00000532
WBGene00000469	WBGene00000840	WBGene00000594	WBGene00000533
WBGene00000472	WBGene00000843	WBGene00000596	WBGene00000534
WBGene00000473	WBGene00000846	WBGene00000597	WBGene00000535
WBGene00000474	WBGene00000854	WBGene00000599	WBGene00000536
WBGene00000475	WBGene00000857	WBGene00000601	WBGene00000539
WBGene00000476	WBGene00000858	WBGene00000602	WBGene00000540
WBGene00000477	WBGene00000869	WBGene00000603	WBGene00000541
WBGene00000479	WBGene00000871	WBGene00000608	WBGene00000542
WBGene00000480	WBGene00000872	WBGene00000611	WBGene00000543
WBGene00000481	WBGene00000874	WBGene00000612	WBGene00000544
WBGene00000482	WBGene00000875	WBGene00000614	WBGene00000545
WBGene00000483	WBGene00000876	WBGene00000615	WBGene00000546
WBGene00000484	WBGene00000877	WBGene00000616	WBGene00000547
WBGene00000485	WBGene00000878	WBGene00000617	WBGene00000549
WBGene00000487	WBGene00000879	WBGene00000618	WBGene00000550
WBGene00000490	WBGene00000880	WBGene00000620	WBGene00000552
WBGene00000491	WBGene00000881	WBGene00000622	WBGene00000553
WBGene00000492	WBGene00000882	WBGene00000625	WBGene00000554
WBGene00000493	WBGene00000883	WBGene00000626	WBGene00000561
WBGene00000498	WBGene00000884	WBGene00000627	WBGene00000565
WBGene00000499	WBGene00000886	WBGene00000631	WBGene00000566
WBGene00000500	WBGene00000887	WBGene00000634	WBGene00000567
WBGene00000501	WBGene00000888	WBGene00000636	WBGene00000584
WBGene00000502	WBGene00000889	WBGene00000637	WBGene00000585
WBGene00000506	WBGene00000890	WBGene00000638	WBGene00000591
WBGene00000507	WBGene00000891	WBGene00000639	WBGene00000606
WBGene00000508	WBGene00000892	WBGene00000640	WBGene00000708
WBGene00000509	WBGene00000896	WBGene00000641	WBGene00000761
WBGene00000510	WBGene00000897	WBGene00000644	WBGene00000762
WBGene00000511	WBGene00000898	WBGene00000645	WBGene00000763
WBGene00000512	WBGene00000903	WBGene00000647	WBGene00000764
WBGene00000513	WBGene00000905	WBGene00000649	WBGene00000765
WBGene00000514	WBGene00000906	WBGene00000650	WBGene00000766
WBGene00000515	WBGene00000914	WBGene00000651	WBGene00000767
WBGene00000518	WBGene00000915	WBGene00000653	WBGene00000768
WBGene00000519	WBGene00000917	WBGene00000654	WBGene00000770
WBGene00000520	WBGene00000923	WBGene00000655	WBGene00000771
WBGene00000521	WBGene00000931	WBGene00000656	WBGene00000772
WBGene00000527	WBGene00000933	WBGene00000657	WBGene00000773
WBGene00000528	WBGene00000934	WBGene00000659	WBGene00000774
WBGene00000529	WBGene00000936	WBGene00000660	WBGene00000776
WBGene00000530	WBGene00000937	WBGene00000661	WBGene00000777
WBGene00000531	WBGene00000939	WBGene00000663	WBGene00000778
WBGene00000532	WBGene00000940	WBGene00000664	WBGene00000780
WBGene00000533	WBGene00000950	WBGene00000665	WBGene00000782
WBGene00000536	WBGene00000952	WBGene00000666	WBGene00000784
WBGene00000537	WBGene00000959	WBGene00000667	WBGene00000785
WBGene00000539	WBGene00000960	WBGene00000668	WBGene00000786
WBGene00000540	WBGene00000962	WBGene00000669	WBGene00000787
WBGene00000541	WBGene00000963	WBGene00000670	WBGene00000788
WBGene00000542	WBGene00000964	WBGene00000671	WBGene00000792
WBGene00000543	WBGene00000966	WBGene00000675	WBGene00000793
WBGene00000544	WBGene00000967	WBGene00000676	WBGene00000794
WBGene00000545	WBGene00000970	WBGene00000678	WBGene00000795
WBGene00000546	WBGene00000971	WBGene00000679	WBGene00000796
WBGene00000547	WBGene00000972	WBGene00000680	WBGene00000798
WBGene00000548	WBGene00000973	WBGene00000681	WBGene00000799
WBGene00000549	WBGene00000974	WBGene00000682	WBGene00000800
WBGene00000550	WBGene00000976	WBGene00000685	WBGene00000802
WBGene00000551	WBGene00000977	WBGene00000687	WBGene00000803
WBGene00000553	WBGene00000978	WBGene00000690	WBGene00000812
WBGene00000554	WBGene00000979	WBGene00000691	WBGene00000813
WBGene00000561	WBGene00000981	WBGene00000692	WBGene00000814
WBGene00000562	WBGene00000982	WBGene00000693	WBGene00000815
WBGene00000563	WBGene00000983	WBGene00000694	WBGene00000816
WBGene00000564	WBGene00000984	WBGene00000696	WBGene00000817
WBGene00000565	WBGene00000985	WBGene00000697	WBGene00000818
WBGene00000566	WBGene00000986	WBGene00000698	WBGene00000822
WBGene00000567	WBGene00000988	WBGene00000699	WBGene00000830
WBGene00000583	WBGene00000989	WBGene00000701	WBGene00000831
WBGene00000585	WBGene00000991	WBGene00000703	WBGene00000832
WBGene00000591	WBGene00000993	WBGene00000704	WBGene00000833
WBGene00000674	WBGene00000994	WBGene00000705	WBGene00000834
WBGene00000761	WBGene00000996	WBGene00000706	WBGene00000835
WBGene00000762	WBGene00001001	WBGene00000707	WBGene00000836
WBGene00000763	WBGene00001005	WBGene00000708	WBGene00000837
WBGene00000764	WBGene00001006	WBGene00000710	WBGene00000838
WBGene00000765	WBGene00001007	WBGene00000711	WBGene00000839
WBGene00000766	WBGene00001016	WBGene00000713	WBGene00000840
WBGene00000767	WBGene00001017	WBGene00000714	WBGene00000841
WBGene00000768	WBGene00001018	WBGene00000715	WBGene00000843
WBGene00000770	WBGene00001019	WBGene00000716	WBGene00000846
WBGene00000771	WBGene00001020	WBGene00000717	WBGene00000854
WBGene00000772	WBGene00001025	WBGene00000718	WBGene00000857
WBGene00000773	WBGene00001026	WBGene00000719	WBGene00000858
WBGene00000774	WBGene00001027	WBGene00000720	WBGene00000863
WBGene00000776	WBGene00001028	WBGene00000721	WBGene00000865
WBGene00000778	WBGene00001029	WBGene00000722	WBGene00000866
WBGene00000781	WBGene00001030	WBGene00000723	WBGene00000867
WBGene00000782	WBGene00001031	WBGene00000724	WBGene00000868
WBGene00000783	WBGene00001032	WBGene00000725	WBGene00000869
WBGene00000784	WBGene00001035	WBGene00000726	WBGene00000870
WBGene00000785	WBGene00001037	WBGene00000727	WBGene00000871
WBGene00000786	WBGene00001038	WBGene00000728	WBGene00000872
WBGene00000787	WBGene00001039	WBGene00000729	WBGene00000874
WBGene00000788	WBGene00001040	WBGene00000730	WBGene00000875
WBGene00000789	WBGene00001041	WBGene00000731	WBGene00000876
WBGene00000793	WBGene00001042	WBGene00000732	WBGene00000877
WBGene00000794	WBGene00001045	WBGene00000733	WBGene00000878
WBGene00000796	WBGene00001046	WBGene00000734	WBGene00000879
WBGene00000798	WBGene00001047	WBGene00000735	WBGene00000880
WBGene00000799	WBGene00001048	WBGene00000737	WBGene00000881
WBGene00000800	WBGene00001049	WBGene00000738	WBGene00000882
WBGene00000802	WBGene00001050	WBGene00000739	WBGene00000883
WBGene00000803	WBGene00001051	WBGene00000740	WBGene00000884
WBGene00000812	WBGene00001052	WBGene00000741	WBGene00000885
WBGene00000813	WBGene00001053	WBGene00000742	WBGene00000886
WBGene00000814	WBGene00001054	WBGene00000743	WBGene00000887
WBGene00000815	WBGene00001055	WBGene00000744	WBGene00000888
WBGene00000816	WBGene00001056	WBGene00000745	WBGene00000889
WBGene00000817	WBGene00001058	WBGene00000746	WBGene00000890
WBGene00000818	WBGene00001073	WBGene00000747	WBGene00000891
WBGene00000819	WBGene00001077	WBGene00000748	WBGene00000892
WBGene00000820	WBGene00001078	WBGene00000749	WBGene00000894
WBGene00000821	WBGene00001081	WBGene00000751	WBGene00000895
WBGene00000822	WBGene00001082	WBGene00000752	WBGene00000896
WBGene00000829	WBGene00001087	WBGene00000753	WBGene00000897
WBGene00000830	WBGene00001089	WBGene00000754	WBGene00000898
WBGene00000831	WBGene00001090	WBGene00000757	WBGene00000900
WBGene00000832	WBGene00001092	WBGene00000759	WBGene00000903
WBGene00000833	WBGene00001093	WBGene00000761	WBGene00000906
WBGene00000834	WBGene00001094	WBGene00000762	WBGene00000911
WBGene00000836	WBGene00001095	WBGene00000763	WBGene00000912
WBGene00000837	WBGene00001115	WBGene00000764	WBGene00000913
WBGene00000838	WBGene00001116	WBGene00000765	WBGene00000914
WBGene00000839	WBGene00001117	WBGene00000766	WBGene00000915
WBGene00000840	WBGene00001118	WBGene00000767	WBGene00000917
WBGene00000841	WBGene00001119	WBGene00000768	WBGene00000923
WBGene00000843	WBGene00001121	WBGene00000770	WBGene00000929
WBGene00000846	WBGene00001122	WBGene00000773	WBGene00000931
WBGene00000854	WBGene00001127	WBGene00000774	WBGene00000933
WBGene00000857	WBGene00001129	WBGene00000775	WBGene00000934
WBGene00000858	WBGene00001130	WBGene00000776	WBGene00000935
WBGene00000865	WBGene00001131	WBGene00000778	WBGene00000936
WBGene00000866	WBGene00001132	WBGene00000785	WBGene00000937
WBGene00000867	WBGene00001134	WBGene00000786	WBGene00000938
WBGene00000868	WBGene00001135	WBGene00000787	WBGene00000939
WBGene00000869	WBGene00001137	WBGene00000788	WBGene00000940
WBGene00000870	WBGene00001149	WBGene00000792	WBGene00000941
WBGene00000871	WBGene00001150	WBGene00000793	WBGene00000942
WBGene00000874	WBGene00001151	WBGene00000794	WBGene00000958
WBGene00000875	WBGene00001153	WBGene00000795	WBGene00000959
WBGene00000876	WBGene00001154	WBGene00000796	WBGene00000960
WBGene00000880	WBGene00001155	WBGene00000798	WBGene00000961
WBGene00000881	WBGene00001160	WBGene00000799	WBGene00000962
WBGene00000882	WBGene00001163	WBGene00000800	WBGene00000963
WBGene00000884	WBGene00001166	WBGene00000802	WBGene00000964
WBGene00000885	WBGene00001168	WBGene00000812	WBGene00000966
WBGene00000886	WBGene00001169	WBGene00000813	WBGene00000967
WBGene00000887	WBGene00001171	WBGene00000814	WBGene00000968
WBGene00000888	WBGene00001172	WBGene00000815	WBGene00000970
WBGene00000890	WBGene00001173	WBGene00000816	WBGene00000971
WBGene00000892	WBGene00001177	WBGene00000817	WBGene00000973
WBGene00000894	WBGene00001179	WBGene00000818	WBGene00000974
WBGene00000895	WBGene00001184	WBGene00000819	WBGene00000976
WBGene00000896	WBGene00001187	WBGene00000822	WBGene00000979
WBGene00000899	WBGene00001188	WBGene00000829	WBGene00000981
WBGene00000900	WBGene00001189	WBGene00000830	WBGene00000982
WBGene00000902	WBGene00001196	WBGene00000831	WBGene00000983
WBGene00000903	WBGene00001202	WBGene00000832	WBGene00000984
WBGene00000904	WBGene00001208	WBGene00000833	WBGene00000985
WBGene00000905	WBGene00001209	WBGene00000834	WBGene00000988
WBGene00000906	WBGene00001215	WBGene00000835	WBGene00000991
WBGene00000910	WBGene00001224	WBGene00000836	WBGene00000992
WBGene00000911	WBGene00001225	WBGene00000837	WBGene00000993
WBGene00000912	WBGene00001226	WBGene00000838	WBGene00000994
WBGene00000913	WBGene00001227	WBGene00000840	WBGene00000996
WBGene00000914	WBGene00001228	WBGene00000843	WBGene00001001
WBGene00000915	WBGene00001229	WBGene00000846	WBGene00001002
WBGene00000917	WBGene00001230	WBGene00000854	WBGene00001005
WBGene00000923	WBGene00001231	WBGene00000857	WBGene00001006
WBGene00000931	WBGene00001232	WBGene00000858	WBGene00001007
WBGene00000933	WBGene00001233	WBGene00000863	WBGene00001008
WBGene00000934	WBGene00001234	WBGene00000865	WBGene00001016
WBGene00000935	WBGene00001236	WBGene00000866	WBGene00001017
WBGene00000936	WBGene00001241	WBGene00000867	WBGene00001018
WBGene00000937	WBGene00001242	WBGene00000869	WBGene00001019
WBGene00000938	WBGene00001247	WBGene00000870	WBGene00001020
WBGene00000939	WBGene00001248	WBGene00000871	WBGene00001025
WBGene00000940	WBGene00001258	WBGene00000872	WBGene00001026
WBGene00000941	WBGene00001259	WBGene00000874	WBGene00001027
WBGene00000942	WBGene00001262	WBGene00000875	WBGene00001028
WBGene00000950	WBGene00001263	WBGene00000876	WBGene00001029
WBGene00000951	WBGene00001303	WBGene00000877	WBGene00001030
WBGene00000952	WBGene00001320	WBGene00000878	WBGene00001031
WBGene00000955	WBGene00001328	WBGene00000879	WBGene00001032
WBGene00000958	WBGene00001329	WBGene00000880	WBGene00001033
WBGene00000959	WBGene00001331	WBGene00000881	WBGene00001035
WBGene00000960	WBGene00001332	WBGene00000882	WBGene00001037
WBGene00000962	WBGene00001333	WBGene00000883	WBGene00001038
WBGene00000963	WBGene00001334	WBGene00000884	WBGene00001039
WBGene00000964	WBGene00001335	WBGene00000886	WBGene00001040
WBGene00000965	WBGene00001336	WBGene00000887	WBGene00001041
WBGene00000966	WBGene00001338	WBGene00000888	WBGene00001042
WBGene00000967	WBGene00001340	WBGene00000889	WBGene00001045
WBGene00000968	WBGene00001352	WBGene00000890	WBGene00001046
WBGene00000969	WBGene00001358	WBGene00000891	WBGene00001047
WBGene00000970	WBGene00001366	WBGene00000892	WBGene00001048
WBGene00000971	WBGene00001368	WBGene00000894	WBGene00001049
WBGene00000972	WBGene00001372	WBGene00000895	WBGene00001050
WBGene00000973	WBGene00001374	WBGene00000896	WBGene00001051
WBGene00000974	WBGene00001377	WBGene00000897	WBGene00001052
WBGene00000976	WBGene00001397	WBGene00000898	WBGene00001054
WBGene00000979	WBGene00001398	WBGene00000903	WBGene00001055
WBGene00000980	WBGene00001399	WBGene00000906	WBGene00001056
WBGene00000981	WBGene00001404	WBGene00000908	WBGene00001058
WBGene00000982	WBGene00001405	WBGene00000911	WBGene00001061
WBGene00000983	WBGene00001411	WBGene00000912	WBGene00001068
WBGene00000984	WBGene00001412	WBGene00000914	WBGene00001073
WBGene00000988	WBGene00001414	WBGene00000915	WBGene00001077
WBGene00000989	WBGene00001423	WBGene00000917	WBGene00001078
WBGene00000993	WBGene00001425	WBGene00000923	WBGene00001080
WBGene00000994	WBGene00001426	WBGene00000929	WBGene00001082
WBGene00000996	WBGene00001428	WBGene00000931	WBGene00001086
WBGene00001001	WBGene00001429	WBGene00000933	WBGene00001087
WBGene00001002	WBGene00001430	WBGene00000934	WBGene00001088
WBGene00001005	WBGene00001431	WBGene00000936	WBGene00001089
WBGene00001006	WBGene00001443	WBGene00000937	WBGene00001090
WBGene00001007	WBGene00001470	WBGene00000938	WBGene00001092
WBGene00001008	WBGene00001475	WBGene00000939	WBGene00001093
WBGene00001016	WBGene00001476	WBGene00000940	WBGene00001094
WBGene00001017	WBGene00001477	WBGene00000941	WBGene00001095
WBGene00001018	WBGene00001478	WBGene00000942	WBGene00001101
WBGene00001019	WBGene00001479	WBGene00000950	WBGene00001115
WBGene00001020	WBGene00001480	WBGene00000952	WBGene00001116
WBGene00001022	WBGene00001485	WBGene00000958	WBGene00001117
WBGene00001023	WBGene00001487	WBGene00000959	WBGene00001118
WBGene00001025	WBGene00001497	WBGene00000960	WBGene00001119
WBGene00001026	WBGene00001498	WBGene00000961	WBGene00001121
WBGene00001027	WBGene00001499	WBGene00000962	WBGene00001122
WBGene00001028	WBGene00001500	WBGene00000963	WBGene00001127
WBGene00001029	WBGene00001501	WBGene00000964	WBGene00001129
WBGene00001030	WBGene00001502	WBGene00000966	WBGene00001130
WBGene00001031	WBGene00001503	WBGene00000967	WBGene00001131
WBGene00001032	WBGene00001507	WBGene00000970	WBGene00001132
WBGene00001033	WBGene00001508	WBGene00000971	WBGene00001134
WBGene00001034	WBGene00001509	WBGene00000972	WBGene00001135
WBGene00001035	WBGene00001510	WBGene00000973	WBGene00001137
WBGene00001037	WBGene00001512	WBGene00000974	WBGene00001145
WBGene00001038	WBGene00001513	WBGene00000976	WBGene00001149
WBGene00001039	WBGene00001515	WBGene00000977	WBGene00001150
WBGene00001040	WBGene00001519	WBGene00000978	WBGene00001151
WBGene00001041	WBGene00001520	WBGene00000979	WBGene00001153
WBGene00001042	WBGene00001522	WBGene00000981	WBGene00001154
WBGene00001043	WBGene00001523	WBGene00000982	WBGene00001155
WBGene00001045	WBGene00001526	WBGene00000983	WBGene00001156
WBGene00001046	WBGene00001527	WBGene00000984	WBGene00001160
WBGene00001047	WBGene00001552	WBGene00000985	WBGene00001161
WBGene00001048	WBGene00001554	WBGene00000986	WBGene00001163
WBGene00001049	WBGene00001555	WBGene00000988	WBGene00001167
WBGene00001051	WBGene00001556	WBGene00000989	WBGene00001168
WBGene00001052	WBGene00001557	WBGene00000993	WBGene00001169
WBGene00001053	WBGene00001558	WBGene00000996	WBGene00001171
WBGene00001054	WBGene00001559	WBGene00001001	WBGene00001172
WBGene00001055	WBGene00001577	WBGene00001002	WBGene00001173
WBGene00001056	WBGene00001579	WBGene00001005	WBGene00001177
WBGene00001057	WBGene00001580	WBGene00001006	WBGene00001178
WBGene00001058	WBGene00001582	WBGene00001007	WBGene00001179
WBGene00001059	WBGene00001585	WBGene00001008	WBGene00001184
WBGene00001061	WBGene00001590	WBGene00001016	WBGene00001187
WBGene00001073	WBGene00001591	WBGene00001017	WBGene00001188
WBGene00001077	WBGene00001592	WBGene00001018	WBGene00001189
WBGene00001078	WBGene00001593	WBGene00001019	WBGene00001194
WBGene00001080	WBGene00001595	WBGene00001020	WBGene00001196
WBGene00001081	WBGene00001598	WBGene00001025	WBGene00001202
WBGene00001082	WBGene00001599	WBGene00001026	WBGene00001204
WBGene00001086	WBGene00001600	WBGene00001027	WBGene00001207
WBGene00001087	WBGene00001601	WBGene00001028	WBGene00001208
WBGene00001088	WBGene00001604	WBGene00001029	WBGene00001209
WBGene00001089	WBGene00001612	WBGene00001030	WBGene00001214
WBGene00001090	WBGene00001613	WBGene00001031	WBGene00001215
WBGene00001092	WBGene00001614	WBGene00001032	WBGene00001223
WBGene00001093	WBGene00001615	WBGene00001033	WBGene00001224
WBGene00001094	WBGene00001616	WBGene00001035	WBGene00001225
WBGene00001095	WBGene00001620	WBGene00001036	WBGene00001226
WBGene00001096	WBGene00001623	WBGene00001037	WBGene00001227
WBGene00001101	WBGene00001627	WBGene00001038	WBGene00001228
WBGene00001102	WBGene00001628	WBGene00001039	WBGene00001229
WBGene00001115	WBGene00001629	WBGene00001040	WBGene00001230
WBGene00001116	WBGene00001632	WBGene00001041	WBGene00001231
WBGene00001117	WBGene00001635	WBGene00001042	WBGene00001232
WBGene00001118	WBGene00001636	WBGene00001043	WBGene00001233
WBGene00001119	WBGene00001638	WBGene00001045	WBGene00001234
WBGene00001121	WBGene00001639	WBGene00001046	WBGene00001235
WBGene00001122	WBGene00001640	WBGene00001047	WBGene00001236
WBGene00001127	WBGene00001641	WBGene00001048	WBGene00001239
WBGene00001129	WBGene00001642	WBGene00001049	WBGene00001240
WBGene00001130	WBGene00001645	WBGene00001050	WBGene00001241
WBGene00001131	WBGene00001646	WBGene00001051	WBGene00001242
WBGene00001132	WBGene00001647	WBGene00001052	WBGene00001245
WBGene00001133	WBGene00001648	WBGene00001053	WBGene00001248
WBGene00001134	WBGene00001650	WBGene00001054	WBGene00001249
WBGene00001135	WBGene00001651	WBGene00001055	WBGene00001258
WBGene00001149	WBGene00001660	WBGene00001056	WBGene00001259
WBGene00001150	WBGene00001661	WBGene00001058	WBGene00001262
WBGene00001151	WBGene00001662	WBGene00001064	WBGene00001263
WBGene00001153	WBGene00001674	WBGene00001065	WBGene00001281
WBGene00001154	WBGene00001678	WBGene00001066	WBGene00001303
WBGene00001155	WBGene00001679	WBGene00001067	WBGene00001320
WBGene00001156	WBGene00001680	WBGene00001069	WBGene00001328
WBGene00001157	WBGene00001683	WBGene00001073	WBGene00001329
WBGene00001158	WBGene00001684	WBGene00001074	WBGene00001330
WBGene00001160	WBGene00001685	WBGene00001075	WBGene00001331
WBGene00001161	WBGene00001686	WBGene00001076	WBGene00001332
WBGene00001162	WBGene00001687	WBGene00001077	WBGene00001333
WBGene00001163	WBGene00001708	WBGene00001078	WBGene00001334
WBGene00001166	WBGene00001709	WBGene00001080	WBGene00001335
WBGene00001167	WBGene00001740	WBGene00001081	WBGene00001336
WBGene00001171	WBGene00001744	WBGene00001082	WBGene00001338
WBGene00001172	WBGene00001745	WBGene00001087	WBGene00001340
WBGene00001173	WBGene00001746	WBGene00001089	WBGene00001352
WBGene00001177	WBGene00001747	WBGene00001090	WBGene00001358
WBGene00001178	WBGene00001748	WBGene00001092	WBGene00001365
WBGene00001179	WBGene00001749	WBGene00001093	WBGene00001366
WBGene00001182	WBGene00001750	WBGene00001094	WBGene00001368
WBGene00001187	WBGene00001751	WBGene00001095	WBGene00001371
WBGene00001188	WBGene00001752	WBGene00001115	WBGene00001372
WBGene00001189	WBGene00001753	WBGene00001117	WBGene00001374
WBGene00001190	WBGene00001754	WBGene00001118	WBGene00001377
WBGene00001194	WBGene00001755	WBGene00001119	WBGene00001395
WBGene00001196	WBGene00001756	WBGene00001121	WBGene00001396
WBGene00001202	WBGene00001757	WBGene00001122	WBGene00001397
WBGene00001204	WBGene00001758	WBGene00001127	WBGene00001398
WBGene00001207	WBGene00001760	WBGene00001129	WBGene00001399
WBGene00001208	WBGene00001761	WBGene00001130	WBGene00001400
WBGene00001209	WBGene00001762	WBGene00001131	WBGene00001403
WBGene00001210	WBGene00001763	WBGene00001132	WBGene00001404
WBGene00001215	WBGene00001764	WBGene00001134	WBGene00001405
WBGene00001224	WBGene00001765	WBGene00001135	WBGene00001406
WBGene00001225	WBGene00001766	WBGene00001137	WBGene00001410
WBGene00001226	WBGene00001767	WBGene00001149	WBGene00001411
WBGene00001227	WBGene00001768	WBGene00001150	WBGene00001412
WBGene00001228	WBGene00001769	WBGene00001151	WBGene00001414
WBGene00001229	WBGene00001770	WBGene00001153	WBGene00001423
WBGene00001230	WBGene00001771	WBGene00001154	WBGene00001426
WBGene00001231	WBGene00001772	WBGene00001155	WBGene00001427
WBGene00001232	WBGene00001773	WBGene00001160	WBGene00001428
WBGene00001233	WBGene00001774	WBGene00001161	WBGene00001430
WBGene00001234	WBGene00001775	WBGene00001162	WBGene00001431
WBGene00001235	WBGene00001776	WBGene00001163	WBGene00001434
WBGene00001236	WBGene00001777	WBGene00001166	WBGene00001439
WBGene00001237	WBGene00001778	WBGene00001167	WBGene00001443
WBGene00001241	WBGene00001779	WBGene00001168	WBGene00001466
WBGene00001242	WBGene00001780	WBGene00001169	WBGene00001470
WBGene00001247	WBGene00001781	WBGene00001171	WBGene00001475
WBGene00001248	WBGene00001782	WBGene00001172	WBGene00001476
WBGene00001249	WBGene00001783	WBGene00001173	WBGene00001477
WBGene00001258	WBGene00001784	WBGene00001177	WBGene00001478
WBGene00001259	WBGene00001785	WBGene00001179	WBGene00001479
WBGene00001262	WBGene00001786	WBGene00001182	WBGene00001480
WBGene00001263	WBGene00001787	WBGene00001184	WBGene00001483
WBGene00001281	WBGene00001789	WBGene00001186	WBGene00001484
WBGene00001303	WBGene00001790	WBGene00001187	WBGene00001485
WBGene00001320	WBGene00001791	WBGene00001188	WBGene00001486
WBGene00001328	WBGene00001793	WBGene00001189	WBGene00001487
WBGene00001330	WBGene00001794	WBGene00001194	WBGene00001488
WBGene00001331	WBGene00001795	WBGene00001196	WBGene00001489
WBGene00001332	WBGene00001796	WBGene00001202	WBGene00001491
WBGene00001333	WBGene00001808	WBGene00001204	WBGene00001492
WBGene00001334	WBGene00001811	WBGene00001207	WBGene00001493
WBGene00001335	WBGene00001813	WBGene00001208	WBGene00001494
WBGene00001336	WBGene00001815	WBGene00001209	WBGene00001496
WBGene00001338	WBGene00001816	WBGene00001215	WBGene00001497
WBGene00001340	WBGene00001823	WBGene00001224	WBGene00001498
WBGene00001345	WBGene00001827	WBGene00001225	WBGene00001499
WBGene00001352	WBGene00001829	WBGene00001226	WBGene00001500
WBGene00001358	WBGene00001830	WBGene00001227	WBGene00001501
WBGene00001365	WBGene00001834	WBGene00001228	WBGene00001502
WBGene00001366	WBGene00001836	WBGene00001229	WBGene00001503
WBGene00001368	WBGene00001840	WBGene00001230	WBGene00001505
WBGene00001371	WBGene00001843	WBGene00001231	WBGene00001507
WBGene00001372	WBGene00001844	WBGene00001232	WBGene00001508
WBGene00001374	WBGene00001853	WBGene00001233	WBGene00001509
WBGene00001377	WBGene00001854	WBGene00001234	WBGene00001510
WBGene00001395	WBGene00001855	WBGene00001235	WBGene00001512
WBGene00001396	WBGene00001856	WBGene00001236	WBGene00001513
WBGene00001397	WBGene00001857	WBGene00001241	WBGene00001515
WBGene00001398	WBGene00001860	WBGene00001248	WBGene00001516
WBGene00001399	WBGene00001863	WBGene00001253	WBGene00001519
WBGene00001401	WBGene00001872	WBGene00001258	WBGene00001520
WBGene00001402	WBGene00001876	WBGene00001259	WBGene00001522
WBGene00001403	WBGene00001877	WBGene00001262	WBGene00001523
WBGene00001404	WBGene00001878	WBGene00001263	WBGene00001526
WBGene00001405	WBGene00001880	WBGene00001281	WBGene00001527
WBGene00001406	WBGene00001881	WBGene00001303	WBGene00001538
WBGene00001410	WBGene00001882	WBGene00001320	WBGene00001551
WBGene00001411	WBGene00001883	WBGene00001324	WBGene00001552
WBGene00001412	WBGene00001885	WBGene00001328	WBGene00001553
WBGene00001414	WBGene00001886	WBGene00001329	WBGene00001554
WBGene00001423	WBGene00001887	WBGene00001330	WBGene00001555
WBGene00001426	WBGene00001889	WBGene00001331	WBGene00001556
WBGene00001427	WBGene00001890	WBGene00001333	WBGene00001558
WBGene00001428	WBGene00001891	WBGene00001335	WBGene00001559
WBGene00001429	WBGene00001893	WBGene00001336	WBGene00001568
WBGene00001430	WBGene00001894	WBGene00001337	WBGene00001574
WBGene00001431	WBGene00001895	WBGene00001338	WBGene00001577
WBGene00001432	WBGene00001896	WBGene00001340	WBGene00001578
WBGene00001433	WBGene00001898	WBGene00001352	WBGene00001579
WBGene00001434	WBGene00001899	WBGene00001358	WBGene00001580
WBGene00001439	WBGene00001901	WBGene00001365	WBGene00001582
WBGene00001440	WBGene00001903	WBGene00001366	WBGene00001585
WBGene00001443	WBGene00001904	WBGene00001368	WBGene00001590
WBGene00001465	WBGene00001906	WBGene00001371	WBGene00001591
WBGene00001470	WBGene00001907	WBGene00001372	WBGene00001592
WBGene00001475	WBGene00001908	WBGene00001374	WBGene00001593
WBGene00001476	WBGene00001909	WBGene00001377	WBGene00001596
WBGene00001477	WBGene00001915	WBGene00001395	WBGene00001604
WBGene00001478	WBGene00001916	WBGene00001396	WBGene00001609
WBGene00001479	WBGene00001917	WBGene00001397	WBGene00001612
WBGene00001480	WBGene00001918	WBGene00001398	WBGene00001613
WBGene00001481	WBGene00001919	WBGene00001399	WBGene00001614
WBGene00001484	WBGene00001921	WBGene00001403	WBGene00001615
WBGene00001485	WBGene00001922	WBGene00001404	WBGene00001616
WBGene00001486	WBGene00001923	WBGene00001405	WBGene00001620
WBGene00001489	WBGene00001925	WBGene00001406	WBGene00001622
WBGene00001490	WBGene00001926	WBGene00001410	WBGene00001623
WBGene00001493	WBGene00001927	WBGene00001411	WBGene00001624
WBGene00001494	WBGene00001928	WBGene00001412	WBGene00001626
WBGene00001496	WBGene00001929	WBGene00001414	WBGene00001627
WBGene00001497	WBGene00001931	WBGene00001423	WBGene00001628
WBGene00001498	WBGene00001932	WBGene00001425	WBGene00001629
WBGene00001499	WBGene00001933	WBGene00001426	WBGene00001630
WBGene00001500	WBGene00001935	WBGene00001427	WBGene00001632
WBGene00001501	WBGene00001936	WBGene00001431	WBGene00001635
WBGene00001502	WBGene00001937	WBGene00001432	WBGene00001636
WBGene00001503	WBGene00001939	WBGene00001434	WBGene00001638
WBGene00001505	WBGene00001940	WBGene00001438	WBGene00001639
WBGene00001507	WBGene00001942	WBGene00001440	WBGene00001641
WBGene00001508	WBGene00001945	WBGene00001443	WBGene00001642
WBGene00001509	WBGene00001946	WBGene00001470	WBGene00001643
WBGene00001510	WBGene00001959	WBGene00001475	WBGene00001644
WBGene00001511	WBGene00001972	WBGene00001476	WBGene00001645
WBGene00001512	WBGene00001973	WBGene00001477	WBGene00001646
WBGene00001513	WBGene00001974	WBGene00001478	WBGene00001647
WBGene00001515	WBGene00001978	WBGene00001480	WBGene00001648
WBGene00001516	WBGene00001979	WBGene00001481	WBGene00001650
WBGene00001519	WBGene00001983	WBGene00001483	WBGene00001651
WBGene00001522	WBGene00001993	WBGene00001485	WBGene00001660
WBGene00001523	WBGene00001999	WBGene00001489	WBGene00001661
WBGene00001526	WBGene00002000	WBGene00001492	WBGene00001662
WBGene00001527	WBGene00002001	WBGene00001494	WBGene00001666
WBGene00001552	WBGene00002003	WBGene00001496	WBGene00001669
WBGene00001554	WBGene00002005	WBGene00001497	WBGene00001674
WBGene00001555	WBGene00002007	WBGene00001498	WBGene00001678
WBGene00001556	WBGene00002008	WBGene00001499	WBGene00001679
WBGene00001557	WBGene00002010	WBGene00001500	WBGene00001680
WBGene00001558	WBGene00002025	WBGene00001501	WBGene00001681
WBGene00001559	WBGene00002028	WBGene00001502	WBGene00001682
WBGene00001560	WBGene00002029	WBGene00001503	WBGene00001683
WBGene00001568	WBGene00002031	WBGene00001505	WBGene00001684
WBGene00001574	WBGene00002035	WBGene00001507	WBGene00001685
WBGene00001577	WBGene00002036	WBGene00001508	WBGene00001686
WBGene00001579	WBGene00002038	WBGene00001509	WBGene00001687
WBGene00001580	WBGene00002039	WBGene00001510	WBGene00001707
WBGene00001582	WBGene00002040	WBGene00001512	WBGene00001708
WBGene00001585	WBGene00002041	WBGene00001515	WBGene00001709
WBGene00001586	WBGene00002042	WBGene00001516	WBGene00001740
WBGene00001587	WBGene00002043	WBGene00001519	WBGene00001743
WBGene00001590	WBGene00002044	WBGene00001520	WBGene00001744
WBGene00001591	WBGene00002045	WBGene00001522	WBGene00001745
WBGene00001592	WBGene00002047	WBGene00001523	WBGene00001746
WBGene00001593	WBGene00002061	WBGene00001526	WBGene00001747
WBGene00001594	WBGene00002062	WBGene00001527	WBGene00001748
WBGene00001595	WBGene00002064	WBGene00001552	WBGene00001749
WBGene00001596	WBGene00002065	WBGene00001554	WBGene00001752
WBGene00001598	WBGene00002070	WBGene00001555	WBGene00001753
WBGene00001599	WBGene00002071	WBGene00001556	WBGene00001756
WBGene00001600	WBGene00002074	WBGene00001557	WBGene00001759
WBGene00001601	WBGene00002075	WBGene00001558	WBGene00001764
WBGene00001602	WBGene00002076	WBGene00001565	WBGene00001769
WBGene00001612	WBGene00002077	WBGene00001577	WBGene00001771
WBGene00001613	WBGene00002078	WBGene00001579	WBGene00001776
WBGene00001618	WBGene00002080	WBGene00001580	WBGene00001777
WBGene00001620	WBGene00002081	WBGene00001582	WBGene00001780
WBGene00001621	WBGene00002083	WBGene00001583	WBGene00001786
WBGene00001622	WBGene00002146	WBGene00001585	WBGene00001787
WBGene00001623	WBGene00002147	WBGene00001590	WBGene00001790
WBGene00001624	WBGene00002152	WBGene00001604	WBGene00001791
WBGene00001625	WBGene00002153	WBGene00001609	WBGene00001792
WBGene00001626	WBGene00002162	WBGene00001612	WBGene00001793
WBGene00001627	WBGene00002169	WBGene00001613	WBGene00001794
WBGene00001628	WBGene00002178	WBGene00001620	WBGene00001795
WBGene00001629	WBGene00002181	WBGene00001626	WBGene00001796
WBGene00001630	WBGene00002182	WBGene00001627	WBGene00001808
WBGene00001632	WBGene00002183	WBGene00001628	WBGene00001811
WBGene00001633	WBGene00002184	WBGene00001629	WBGene00001812
WBGene00001635	WBGene00002185	WBGene00001632	WBGene00001813
WBGene00001636	WBGene00002189	WBGene00001635	WBGene00001814
WBGene00001637	WBGene00002190	WBGene00001636	WBGene00001815
WBGene00001638	WBGene00002191	WBGene00001638	WBGene00001816
WBGene00001639	WBGene00002192	WBGene00001639	WBGene00001817
WBGene00001640	WBGene00002196	WBGene00001640	WBGene00001818
WBGene00001641	WBGene00002198	WBGene00001641	WBGene00001819
WBGene00001642	WBGene00002199	WBGene00001642	WBGene00001823
WBGene00001643	WBGene00002200	WBGene00001643	WBGene00001827
WBGene00001644	WBGene00002201	WBGene00001644	WBGene00001829
WBGene00001645	WBGene00002202	WBGene00001645	WBGene00001830
WBGene00001646	WBGene00002203	WBGene00001646	WBGene00001833
WBGene00001647	WBGene00002205	WBGene00001648	WBGene00001834
WBGene00001648	WBGene00002207	WBGene00001650	WBGene00001836
WBGene00001650	WBGene00002211	WBGene00001651	WBGene00001837
WBGene00001653	WBGene00002213	WBGene00001653	WBGene00001840
WBGene00001660	WBGene00002215	WBGene00001660	WBGene00001843
WBGene00001661	WBGene00002217	WBGene00001661	WBGene00001844
WBGene00001662	WBGene00002218	WBGene00001662	WBGene00001851
WBGene00001674	WBGene00002219	WBGene00001674	WBGene00001853
WBGene00001679	WBGene00002222	WBGene00001679	WBGene00001854
WBGene00001680	WBGene00002223	WBGene00001680	WBGene00001855
WBGene00001682	WBGene00002228	WBGene00001681	WBGene00001856
WBGene00001683	WBGene00002229	WBGene00001682	WBGene00001857
WBGene00001684	WBGene00002230	WBGene00001683	WBGene00001860
WBGene00001685	WBGene00002232	WBGene00001684	WBGene00001862
WBGene00001686	WBGene00002233	WBGene00001685	WBGene00001863
WBGene00001687	WBGene00002235	WBGene00001686	WBGene00001865
WBGene00001707	WBGene00002238	WBGene00001687	WBGene00001872
WBGene00001708	WBGene00002239	WBGene00001707	WBGene00001875
WBGene00001709	WBGene00002242	WBGene00001708	WBGene00001876
WBGene00001726	WBGene00002243	WBGene00001709	WBGene00001877
WBGene00001732	WBGene00002244	WBGene00001740	WBGene00001878
WBGene00001740	WBGene00002245	WBGene00001743	WBGene00001879
WBGene00001743	WBGene00002247	WBGene00001744	WBGene00001880
WBGene00001744	WBGene00002248	WBGene00001745	WBGene00001881
WBGene00001745	WBGene00002249	WBGene00001746	WBGene00001882
WBGene00001746	WBGene00002251	WBGene00001747	WBGene00001883
WBGene00001747	WBGene00002257	WBGene00001748	WBGene00001884
WBGene00001749	WBGene00002258	WBGene00001749	WBGene00001885
WBGene00001758	WBGene00002259	WBGene00001758	WBGene00001886
WBGene00001771	WBGene00002260	WBGene00001759	WBGene00001887
WBGene00001773	WBGene00002261	WBGene00001771	WBGene00001888
WBGene00001789	WBGene00002262	WBGene00001773	WBGene00001889
WBGene00001790	WBGene00002264	WBGene00001790	WBGene00001890
WBGene00001791	WBGene00002265	WBGene00001791	WBGene00001891
WBGene00001792	WBGene00002266	WBGene00001792	WBGene00001892
WBGene00001793	WBGene00002267	WBGene00001793	WBGene00001893
WBGene00001794	WBGene00002268	WBGene00001794	WBGene00001894
WBGene00001808	WBGene00002280	WBGene00001808	WBGene00001895
WBGene00001811	WBGene00002282	WBGene00001811	WBGene00001896
WBGene00001812	WBGene00002297	WBGene00001813	WBGene00001898
WBGene00001813	WBGene00002324	WBGene00001814	WBGene00001899
WBGene00001814	WBGene00002335	WBGene00001815	WBGene00001900
WBGene00001815	WBGene00002344	WBGene00001816	WBGene00001901
WBGene00001816	WBGene00002348	WBGene00001819	WBGene00001902
WBGene00001817	WBGene00002363	WBGene00001823	WBGene00001903
WBGene00001818	WBGene00002497	WBGene00001827	WBGene00001904
WBGene00001819	WBGene00002632	WBGene00001833	WBGene00001905
WBGene00001823	WBGene00002637	WBGene00001834	WBGene00001906
WBGene00001824	WBGene00002694	WBGene00001837	WBGene00001907
WBGene00001827	WBGene00002696	WBGene00001840	WBGene00001908
WBGene00001829	WBGene00002717	WBGene00001843	WBGene00001909
WBGene00001830	WBGene00002845	WBGene00001844	WBGene00001911
WBGene00001833	WBGene00002855	WBGene00001853	WBGene00001912
WBGene00001834	WBGene00002879	WBGene00001854	WBGene00001915
WBGene00001836	WBGene00002889	WBGene00001855	WBGene00001916
WBGene00001837	WBGene00002891	WBGene00001856	WBGene00001917
WBGene00001840	WBGene00002957	WBGene00001857	WBGene00001918
WBGene00001843	WBGene00002978	WBGene00001860	WBGene00001919
WBGene00001844	WBGene00002980	WBGene00001862	WBGene00001920
WBGene00001851	WBGene00002981	WBGene00001863	WBGene00001921
WBGene00001852	WBGene00002985	WBGene00001865	WBGene00001922
WBGene00001853	WBGene00002988	WBGene00001872	WBGene00001923
WBGene00001854	WBGene00002989	WBGene00001875	WBGene00001924
WBGene00001855	WBGene00002990	WBGene00001876	WBGene00001925
WBGene00001856	WBGene00002991	WBGene00001877	WBGene00001926
WBGene00001857	WBGene00002996	WBGene00001878	WBGene00001927
WBGene00001860	WBGene00002998	WBGene00001879	WBGene00001928
WBGene00001863	WBGene00003000	WBGene00001880	WBGene00001929
WBGene00001865	WBGene00003007	WBGene00001881	WBGene00001930
WBGene00001869	WBGene00003009	WBGene00001882	WBGene00001931
WBGene00001872	WBGene00003014	WBGene00001883	WBGene00001932
WBGene00001875	WBGene00003017	WBGene00001884	WBGene00001933
WBGene00001876	WBGene00003020	WBGene00001885	WBGene00001934
WBGene00001877	WBGene00003024	WBGene00001886	WBGene00001935
WBGene00001878	WBGene00003025	WBGene00001887	WBGene00001936
WBGene00001879	WBGene00003026	WBGene00001888	WBGene00001937
WBGene00001880	WBGene00003030	WBGene00001889	WBGene00001938
WBGene00001881	WBGene00003036	WBGene00001890	WBGene00001939
WBGene00001882	WBGene00003041	WBGene00001891	WBGene00001940
WBGene00001883	WBGene00003043	WBGene00001892	WBGene00001941
WBGene00001884	WBGene00003047	WBGene00001893	WBGene00001942
WBGene00001885	WBGene00003048	WBGene00001894	WBGene00001943
WBGene00001886	WBGene00003052	WBGene00001895	WBGene00001945
WBGene00001887	WBGene00003059	WBGene00001896	WBGene00001946
WBGene00001888	WBGene00003060	WBGene00001898	WBGene00001948
WBGene00001889	WBGene00003061	WBGene00001899	WBGene00001949
WBGene00001890	WBGene00003062	WBGene00001900	WBGene00001950
WBGene00001891	WBGene00003063	WBGene00001901	WBGene00001952
WBGene00001892	WBGene00003064	WBGene00001902	WBGene00001953
WBGene00001893	WBGene00003066	WBGene00001903	WBGene00001955
WBGene00001894	WBGene00003071	WBGene00001904	WBGene00001958
WBGene00001895	WBGene00003073	WBGene00001905	WBGene00001959
WBGene00001896	WBGene00003074	WBGene00001906	WBGene00001961
WBGene00001898	WBGene00003076	WBGene00001907	WBGene00001972
WBGene00001899	WBGene00003077	WBGene00001908	WBGene00001973
WBGene00001900	WBGene00003078	WBGene00001909	WBGene00001974
WBGene00001901	WBGene00003079	WBGene00001911	WBGene00001975
WBGene00001902	WBGene00003080	WBGene00001912	WBGene00001978
WBGene00001903	WBGene00003081	WBGene00001915	WBGene00001979
WBGene00001904	WBGene00003082	WBGene00001916	WBGene00001980
WBGene00001905	WBGene00003085	WBGene00001917	WBGene00001983
WBGene00001906	WBGene00003086	WBGene00001918	WBGene00001993
WBGene00001907	WBGene00003102	WBGene00001919	WBGene00001994
WBGene00001908	WBGene00003112	WBGene00001920	WBGene00001995
WBGene00001909	WBGene00003119	WBGene00001921	WBGene00001996
WBGene00001911	WBGene00003123	WBGene00001922	WBGene00001997
WBGene00001912	WBGene00003129	WBGene00001923	WBGene00001998
WBGene00001913	WBGene00003136	WBGene00001924	WBGene00001999
WBGene00001915	WBGene00003142	WBGene00001925	WBGene00002000
WBGene00001916	WBGene00003143	WBGene00001926	WBGene00002001
WBGene00001917	WBGene00003148	WBGene00001927	WBGene00002002
WBGene00001918	WBGene00003150	WBGene00001928	WBGene00002003
WBGene00001919	WBGene00003153	WBGene00001929	WBGene00002004
WBGene00001920	WBGene00003154	WBGene00001930	WBGene00002005
WBGene00001921	WBGene00003156	WBGene00001931	WBGene00002007
WBGene00001922	WBGene00003157	WBGene00001932	WBGene00002008
WBGene00001923	WBGene00003158	WBGene00001933	WBGene00002010
WBGene00001924	WBGene00003159	WBGene00001934	WBGene00002015
WBGene00001925	WBGene00003161	WBGene00001935	WBGene00002016
WBGene00001926	WBGene00003162	WBGene00001936	WBGene00002017
WBGene00001927	WBGene00003164	WBGene00001937	WBGene00002021
WBGene00001928	WBGene00003168	WBGene00001938	WBGene00002025
WBGene00001929	WBGene00003171	WBGene00001939	WBGene00002026
WBGene00001930	WBGene00003174	WBGene00001940	WBGene00002028
WBGene00001931	WBGene00003175	WBGene00001941	WBGene00002029
WBGene00001932	WBGene00003177	WBGene00001942	WBGene00002030
WBGene00001933	WBGene00003182	WBGene00001945	WBGene00002031
WBGene00001934	WBGene00003185	WBGene00001948	WBGene00002035
WBGene00001935	WBGene00003186	WBGene00001949	WBGene00002036
WBGene00001936	WBGene00003196	WBGene00001950	WBGene00002038
WBGene00001937	WBGene00003214	WBGene00001952	WBGene00002039
WBGene00001938	WBGene00003232	WBGene00001953	WBGene00002040
WBGene00001939	WBGene00003233	WBGene00001954	WBGene00002041
WBGene00001940	WBGene00003243	WBGene00001955	WBGene00002042
WBGene00001941	WBGene00003246	WBGene00001959	WBGene00002043
WBGene00001942	WBGene00003247	WBGene00001972	WBGene00002044
WBGene00001943	WBGene00003253	WBGene00001973	WBGene00002045
WBGene00001944	WBGene00003254	WBGene00001974	WBGene00002046
WBGene00001948	WBGene00003368	WBGene00001975	WBGene00002047
WBGene00001949	WBGene00003369	WBGene00001978	WBGene00002048
WBGene00001952	WBGene00003370	WBGene00001979	WBGene00002050
WBGene00001953	WBGene00003371	WBGene00001983	WBGene00002051
WBGene00001954	WBGene00003372	WBGene00001993	WBGene00002052
WBGene00001955	WBGene00003375	WBGene00001994	WBGene00002061
WBGene00001957	WBGene00003376	WBGene00001995	WBGene00002062
WBGene00001959	WBGene00003378	WBGene00001997	WBGene00002064
WBGene00001960	WBGene00003389	WBGene00001998	WBGene00002065
WBGene00001961	WBGene00003390	WBGene00001999	WBGene00002066
WBGene00001971	WBGene00003391	WBGene00002000	WBGene00002070
WBGene00001973	WBGene00003392	WBGene00002001	WBGene00002071
WBGene00001974	WBGene00003393	WBGene00002002	WBGene00002074
WBGene00001975	WBGene00003396	WBGene00002003	WBGene00002075
WBGene00001978	WBGene00003397	WBGene00002004	WBGene00002076
WBGene00001979	WBGene00003400	WBGene00002005	WBGene00002077
WBGene00001983	WBGene00003401	WBGene00002007	WBGene00002078
WBGene00001985	WBGene00003405	WBGene00002008	WBGene00002079
WBGene00001993	WBGene00003406	WBGene00002010	WBGene00002080
WBGene00001994	WBGene00003407	WBGene00002011	WBGene00002081
WBGene00001997	WBGene00003408	WBGene00002012	WBGene00002083
WBGene00001998	WBGene00003409	WBGene00002013	WBGene00002146
WBGene00001999	WBGene00003410	WBGene00002023	WBGene00002147
WBGene00002000	WBGene00003411	WBGene00002025	WBGene00002149
WBGene00002001	WBGene00003412	WBGene00002027	WBGene00002150
WBGene00002002	WBGene00003415	WBGene00002028	WBGene00002152
WBGene00002003	WBGene00003417	WBGene00002029	WBGene00002153
WBGene00002004	WBGene00003421	WBGene00002031	WBGene00002162
WBGene00002005	WBGene00003422	WBGene00002032	WBGene00002169
WBGene00002007	WBGene00003423	WBGene00002033	WBGene00002173
WBGene00002008	WBGene00003475	WBGene00002035	WBGene00002175
WBGene00002010	WBGene00003477	WBGene00002036	WBGene00002176
WBGene00002011	WBGene00003478	WBGene00002038	WBGene00002178
WBGene00002012	WBGene00003479	WBGene00002039	WBGene00002179
WBGene00002013	WBGene00003514	WBGene00002040	WBGene00002180
WBGene00002015	WBGene00003515	WBGene00002041	WBGene00002181
WBGene00002016	WBGene00003517	WBGene00002042	WBGene00002182
WBGene00002017	WBGene00003518	WBGene00002043	WBGene00002183
WBGene00002018	WBGene00003519	WBGene00002044	WBGene00002184
WBGene00002019	WBGene00003555	WBGene00002045	WBGene00002185
WBGene00002020	WBGene00003558	WBGene00002046	WBGene00002189
WBGene00002021	WBGene00003561	WBGene00002047	WBGene00002190
WBGene00002023	WBGene00003562	WBGene00002048	WBGene00002191
WBGene00002024	WBGene00003563	WBGene00002050	WBGene00002192
WBGene00002025	WBGene00003566	WBGene00002051	WBGene00002196
WBGene00002028	WBGene00003567	WBGene00002052	WBGene00002198
WBGene00002029	WBGene00003569	WBGene00002053	WBGene00002201
WBGene00002030	WBGene00003570	WBGene00002054	WBGene00002202
WBGene00002031	WBGene00003571	WBGene00002061	WBGene00002203
WBGene00002035	WBGene00003572	WBGene00002062	WBGene00002207
WBGene00002036	WBGene00003573	WBGene00002064	WBGene00002213
WBGene00002037	WBGene00003574	WBGene00002065	WBGene00002215
WBGene00002038	WBGene00003575	WBGene00002066	WBGene00002216
WBGene00002039	WBGene00003576	WBGene00002069	WBGene00002217
WBGene00002040	WBGene00003579	WBGene00002070	WBGene00002218
WBGene00002041	WBGene00003580	WBGene00002071	WBGene00002219
WBGene00002042	WBGene00003581	WBGene00002074	WBGene00002222
WBGene00002043	WBGene00003583	WBGene00002075	WBGene00002223
WBGene00002044	WBGene00003584	WBGene00002076	WBGene00002227
WBGene00002045	WBGene00003586	WBGene00002077	WBGene00002228
WBGene00002046	WBGene00003587	WBGene00002078	WBGene00002229
WBGene00002047	WBGene00003588	WBGene00002079	WBGene00002230
WBGene00002048	WBGene00003589	WBGene00002080	WBGene00002232
WBGene00002050	WBGene00003596	WBGene00002081	WBGene00002233
WBGene00002051	WBGene00003622	WBGene00002083	WBGene00002235
WBGene00002052	WBGene00003654	WBGene00002146	WBGene00002238
WBGene00002053	WBGene00003657	WBGene00002147	WBGene00002239
WBGene00002054	WBGene00003659	WBGene00002150	WBGene00002243
WBGene00002055	WBGene00003730	WBGene00002152	WBGene00002245
WBGene00002056	WBGene00003731	WBGene00002153	WBGene00002247
WBGene00002057	WBGene00003733	WBGene00002162	WBGene00002248
WBGene00002058	WBGene00003734	WBGene00002169	WBGene00002249
WBGene00002059	WBGene00003735	WBGene00002173	WBGene00002251
WBGene00002060	WBGene00003736	WBGene00002175	WBGene00002252
WBGene00002061	WBGene00003772	WBGene00002176	WBGene00002257
WBGene00002062	WBGene00003774	WBGene00002178	WBGene00002258
WBGene00002063	WBGene00003775	WBGene00002179	WBGene00002261
WBGene00002064	WBGene00003776	WBGene00002180	WBGene00002262
WBGene00002065	WBGene00003778	WBGene00002181	WBGene00002264
WBGene00002066	WBGene00003787	WBGene00002182	WBGene00002276
WBGene00002069	WBGene00003788	WBGene00002183	WBGene00002280
WBGene00002070	WBGene00003789	WBGene00002184	WBGene00002295
WBGene00002071	WBGene00003794	WBGene00002185	WBGene00002297
WBGene00002073	WBGene00003798	WBGene00002189	WBGene00002299
WBGene00002074	WBGene00003799	WBGene00002190	WBGene00002324
WBGene00002075	WBGene00003800	WBGene00002191	WBGene00002335
WBGene00002076	WBGene00003803	WBGene00002192	WBGene00002344
WBGene00002077	WBGene00003804	WBGene00002196	WBGene00002348
WBGene00002078	WBGene00003806	WBGene00002201	WBGene00002363
WBGene00002079	WBGene00003807	WBGene00002202	WBGene00002497
WBGene00002080	WBGene00003808	WBGene00002203	WBGene00002583
WBGene00002081	WBGene00003815	WBGene00002207	WBGene00002601
WBGene00002083	WBGene00003816	WBGene00002213	WBGene00002632
WBGene00002146	WBGene00003818	WBGene00002215	WBGene00002637
WBGene00002147	WBGene00003821	WBGene00002216	WBGene00002694
WBGene00002149	WBGene00003826	WBGene00002217	WBGene00002696
WBGene00002150	WBGene00003828	WBGene00002219	WBGene00002717
WBGene00002151	WBGene00003829	WBGene00002222	WBGene00002804
WBGene00002152	WBGene00003831	WBGene00002223	WBGene00002845
WBGene00002153	WBGene00003834	WBGene00002225	WBGene00002850
WBGene00002162	WBGene00003835	WBGene00002226	WBGene00002855
WBGene00002169	WBGene00003844	WBGene00002227	WBGene00002879
WBGene00002173	WBGene00003858	WBGene00002228	WBGene00002889
WBGene00002174	WBGene00003862	WBGene00002229	WBGene00002891
WBGene00002175	WBGene00003863	WBGene00002230	WBGene00002957
WBGene00002176	WBGene00003870	WBGene00002232	WBGene00002978
WBGene00002177	WBGene00003876	WBGene00002233	WBGene00002979
WBGene00002178	WBGene00003877	WBGene00002235	WBGene00002980
WBGene00002179	WBGene00003878	WBGene00002238	WBGene00002982
WBGene00002181	WBGene00003882	WBGene00002239	WBGene00002985
WBGene00002182	WBGene00003883	WBGene00002242	WBGene00002986
WBGene00002183	WBGene00003884	WBGene00002243	WBGene00002987
WBGene00002184	WBGene00003885	WBGene00002244	WBGene00002988
WBGene00002185	WBGene00003886	WBGene00002245	WBGene00002989
WBGene00002189	WBGene00003892	WBGene00002247	WBGene00002990
WBGene00002190	WBGene00003893	WBGene00002248	WBGene00002991
WBGene00002191	WBGene00003898	WBGene00002249	WBGene00002996
WBGene00002192	WBGene00003901	WBGene00002251	WBGene00002998
WBGene00002196	WBGene00003902	WBGene00002252	WBGene00002999
WBGene00002201	WBGene00003903	WBGene00002257	WBGene00003000
WBGene00002202	WBGene00003904	WBGene00002258	WBGene00003001
WBGene00002203	WBGene00003905	WBGene00002259	WBGene00003007
WBGene00002207	WBGene00003906	WBGene00002260	WBGene00003008
WBGene00002213	WBGene00003907	WBGene00002261	WBGene00003009
WBGene00002214	WBGene00003911	WBGene00002262	WBGene00003014
WBGene00002215	WBGene00003914	WBGene00002263	WBGene00003017
WBGene00002216	WBGene00003916	WBGene00002264	WBGene00003018
WBGene00002217	WBGene00003919	WBGene00002266	WBGene00003020
WBGene00002219	WBGene00003920	WBGene00002267	WBGene00003024
WBGene00002220	WBGene00003921	WBGene00002268	WBGene00003025
WBGene00002222	WBGene00003922	WBGene00002269	WBGene00003026
WBGene00002223	WBGene00003923	WBGene00002270	WBGene00003030
WBGene00002225	WBGene00003924	WBGene00002271	WBGene00003033
WBGene00002226	WBGene00003925	WBGene00002272	WBGene00003034
WBGene00002227	WBGene00003926	WBGene00002273	WBGene00003036
WBGene00002228	WBGene00003927	WBGene00002275	WBGene00003037
WBGene00002229	WBGene00003928	WBGene00002276	WBGene00003040
WBGene00002230	WBGene00003929	WBGene00002278	WBGene00003041
WBGene00002233	WBGene00003930	WBGene00002280	WBGene00003043
WBGene00002235	WBGene00003931	WBGene00002295	WBGene00003047
WBGene00002238	WBGene00003932	WBGene00002297	WBGene00003048
WBGene00002242	WBGene00003941	WBGene00002324	WBGene00003052
WBGene00002243	WBGene00003947	WBGene00002335	WBGene00003058
WBGene00002245	WBGene00003949	WBGene00002344	WBGene00003059
WBGene00002247	WBGene00003950	WBGene00002348	WBGene00003060
WBGene00002249	WBGene00003951	WBGene00002363	WBGene00003061
WBGene00002251	WBGene00003952	WBGene00002497	WBGene00003062
WBGene00002252	WBGene00003954	WBGene00002583	WBGene00003063
WBGene00002257	WBGene00003956	WBGene00002601	WBGene00003064
WBGene00002258	WBGene00003961	WBGene00002632	WBGene00003066
WBGene00002259	WBGene00003963	WBGene00002637	WBGene00003068
WBGene00002260	WBGene00003964	WBGene00002694	WBGene00003071
WBGene00002261	WBGene00003965	WBGene00002696	WBGene00003072
WBGene00002262	WBGene00003966	WBGene00002717	WBGene00003073
WBGene00002264	WBGene00003967	WBGene00002804	WBGene00003074
WBGene00002265	WBGene00003969	WBGene00002845	WBGene00003076
WBGene00002266	WBGene00003970	WBGene00002850	WBGene00003077
WBGene00002267	WBGene00003975	WBGene00002855	WBGene00003078
WBGene00002268	WBGene00003978	WBGene00002879	WBGene00003079
WBGene00002269	WBGene00003986	WBGene00002889	WBGene00003080
WBGene00002270	WBGene00003995	WBGene00002891	WBGene00003081
WBGene00002271	WBGene00004003	WBGene00002915	WBGene00003082
WBGene00002272	WBGene00004014	WBGene00002957	WBGene00003084
WBGene00002273	WBGene00004015	WBGene00002976	WBGene00003085
WBGene00002275	WBGene00004016	WBGene00002978	WBGene00003086
WBGene00002276	WBGene00004025	WBGene00002979	WBGene00003089
WBGene00002278	WBGene00004028	WBGene00002980	WBGene00003102
WBGene00002280	WBGene00004032	WBGene00002981	WBGene00003106
WBGene00002295	WBGene00004033	WBGene00002982	WBGene00003107
WBGene00002297	WBGene00004034	WBGene00002985	WBGene00003112
WBGene00002299	WBGene00004035	WBGene00002986	WBGene00003119
WBGene00002324	WBGene00004036	WBGene00002987	WBGene00003123
WBGene00002335	WBGene00004038	WBGene00002988	WBGene00003129
WBGene00002348	WBGene00004039	WBGene00002989	WBGene00003130
WBGene00002363	WBGene00004040	WBGene00002990	WBGene00003132
WBGene00002497	WBGene00004042	WBGene00002991	WBGene00003133
WBGene00002583	WBGene00004043	WBGene00002996	WBGene00003134
WBGene00002601	WBGene00004045	WBGene00002998	WBGene00003136
WBGene00002632	WBGene00004046	WBGene00003000	WBGene00003142
WBGene00002637	WBGene00004047	WBGene00003001	WBGene00003143
WBGene00002694	WBGene00004049	WBGene00003002	WBGene00003144
WBGene00002696	WBGene00004055	WBGene00003007	WBGene00003148
WBGene00002717	WBGene00004058	WBGene00003009	WBGene00003149
WBGene00002783	WBGene00004059	WBGene00003014	WBGene00003150
WBGene00002804	WBGene00004060	WBGene00003017	WBGene00003151
WBGene00002827	WBGene00004061	WBGene00003020	WBGene00003153
WBGene00002845	WBGene00004063	WBGene00003024	WBGene00003154
WBGene00002850	WBGene00004064	WBGene00003025	WBGene00003155
WBGene00002855	WBGene00004075	WBGene00003026	WBGene00003156
WBGene00002879	WBGene00004085	WBGene00003030	WBGene00003157
WBGene00002881	WBGene00004087	WBGene00003033	WBGene00003158
WBGene00002889	WBGene00004088	WBGene00003034	WBGene00003159
WBGene00002915	WBGene00004089	WBGene00003035	WBGene00003161
WBGene00002957	WBGene00004090	WBGene00003036	WBGene00003162
WBGene00002974	WBGene00004091	WBGene00003037	WBGene00003163
WBGene00002976	WBGene00004092	WBGene00003041	WBGene00003164
WBGene00002978	WBGene00004101	WBGene00003043	WBGene00003166
WBGene00002980	WBGene00004109	WBGene00003047	WBGene00003171
WBGene00002981	WBGene00004121	WBGene00003048	WBGene00003172
WBGene00002982	WBGene00004131	WBGene00003052	WBGene00003175
WBGene00002985	WBGene00004134	WBGene00003057	WBGene00003177
WBGene00002986	WBGene00004135	WBGene00003058	WBGene00003178
WBGene00002987	WBGene00004136	WBGene00003059	WBGene00003182
WBGene00002988	WBGene00004151	WBGene00003060	WBGene00003183
WBGene00002989	WBGene00004178	WBGene00003061	WBGene00003185
WBGene00002991	WBGene00004179	WBGene00003062	WBGene00003186
WBGene00002996	WBGene00004180	WBGene00003063	WBGene00003196
WBGene00002998	WBGene00004181	WBGene00003064	WBGene00003214
WBGene00002999	WBGene00004183	WBGene00003066	WBGene00003220
WBGene00003000	WBGene00004184	WBGene00003068	WBGene00003222
WBGene00003002	WBGene00004185	WBGene00003071	WBGene00003225
WBGene00003007	WBGene00004186	WBGene00003073	WBGene00003229
WBGene00003008	WBGene00004187	WBGene00003074	WBGene00003232
WBGene00003009	WBGene00004188	WBGene00003076	WBGene00003233
WBGene00003014	WBGene00004190	WBGene00003077	WBGene00003234
WBGene00003015	WBGene00004194	WBGene00003078	WBGene00003235
WBGene00003017	WBGene00004197	WBGene00003079	WBGene00003239
WBGene00003018	WBGene00004198	WBGene00003080	WBGene00003243
WBGene00003020	WBGene00004201	WBGene00003081	WBGene00003246
WBGene00003024	WBGene00004203	WBGene00003082	WBGene00003247
WBGene00003025	WBGene00004204	WBGene00003084	WBGene00003253
WBGene00003026	WBGene00004205	WBGene00003085	WBGene00003254
WBGene00003030	WBGene00004206	WBGene00003086	WBGene00003367
WBGene00003031	WBGene00004207	WBGene00003089	WBGene00003368
WBGene00003033	WBGene00004208	WBGene00003102	WBGene00003369
WBGene00003034	WBGene00004209	WBGene00003106	WBGene00003370
WBGene00003036	WBGene00004210	WBGene00003112	WBGene00003372
WBGene00003037	WBGene00004211	WBGene00003119	WBGene00003373
WBGene00003040	WBGene00004212	WBGene00003123	WBGene00003374
WBGene00003041	WBGene00004213	WBGene00003124	WBGene00003375
WBGene00003043	WBGene00004214	WBGene00003129	WBGene00003376
WBGene00003047	WBGene00004215	WBGene00003130	WBGene00003377
WBGene00003048	WBGene00004248	WBGene00003132	WBGene00003378
WBGene00003052	WBGene00004254	WBGene00003134	WBGene00003384
WBGene00003055	WBGene00004255	WBGene00003136	WBGene00003387
WBGene00003058	WBGene00004256	WBGene00003142	WBGene00003389
WBGene00003059	WBGene00004257	WBGene00003143	WBGene00003390
WBGene00003061	WBGene00004258	WBGene00003148	WBGene00003391
WBGene00003062	WBGene00004259	WBGene00003149	WBGene00003392
WBGene00003063	WBGene00004266	WBGene00003150	WBGene00003393
WBGene00003064	WBGene00004267	WBGene00003153	WBGene00003394
WBGene00003068	WBGene00004268	WBGene00003154	WBGene00003396
WBGene00003071	WBGene00004269	WBGene00003155	WBGene00003397
WBGene00003073	WBGene00004270	WBGene00003156	WBGene00003400
WBGene00003074	WBGene00004272	WBGene00003157	WBGene00003401
WBGene00003076	WBGene00004273	WBGene00003158	WBGene00003404
WBGene00003077	WBGene00004274	WBGene00003159	WBGene00003405
WBGene00003078	WBGene00004276	WBGene00003161	WBGene00003406
WBGene00003079	WBGene00004277	WBGene00003162	WBGene00003407
WBGene00003080	WBGene00004278	WBGene00003164	WBGene00003408
WBGene00003081	WBGene00004279	WBGene00003166	WBGene00003409
WBGene00003082	WBGene00004281	WBGene00003168	WBGene00003410
WBGene00003084	WBGene00004282	WBGene00003172	WBGene00003411
WBGene00003085	WBGene00004283	WBGene00003174	WBGene00003412
WBGene00003086	WBGene00004284	WBGene00003175	WBGene00003413
WBGene00003087	WBGene00004285	WBGene00003177	WBGene00003414
WBGene00003089	WBGene00004286	WBGene00003182	WBGene00003415
WBGene00003106	WBGene00004287	WBGene00003183	WBGene00003417
WBGene00003107	WBGene00004297	WBGene00003185	WBGene00003418
WBGene00003111	WBGene00004298	WBGene00003186	WBGene00003421
WBGene00003112	WBGene00004302	WBGene00003196	WBGene00003422
WBGene00003119	WBGene00004304	WBGene00003210	WBGene00003423
WBGene00003123	WBGene00004305	WBGene00003214	WBGene00003472
WBGene00003124	WBGene00004307	WBGene00003220	WBGene00003475
WBGene00003129	WBGene00004308	WBGene00003224	WBGene00003476
WBGene00003130	WBGene00004310	WBGene00003225	WBGene00003477
WBGene00003132	WBGene00004311	WBGene00003232	WBGene00003478
WBGene00003133	WBGene00004313	WBGene00003233	WBGene00003479
WBGene00003134	WBGene00004314	WBGene00003234	WBGene00003482
WBGene00003136	WBGene00004315	WBGene00003242	WBGene00003485
WBGene00003143	WBGene00004316	WBGene00003243	WBGene00003495
WBGene00003148	WBGene00004319	WBGene00003246	WBGene00003497
WBGene00003149	WBGene00004320	WBGene00003247	WBGene00003504
WBGene00003150	WBGene00004321	WBGene00003253	WBGene00003510
WBGene00003151	WBGene00004322	WBGene00003254	WBGene00003511
WBGene00003153	WBGene00004337	WBGene00003258	WBGene00003514
WBGene00003154	WBGene00004338	WBGene00003367	WBGene00003515
WBGene00003155	WBGene00004339	WBGene00003368	WBGene00003516
WBGene00003156	WBGene00004341	WBGene00003372	WBGene00003517
WBGene00003157	WBGene00004344	WBGene00003373	WBGene00003519
WBGene00003158	WBGene00004345	WBGene00003374	WBGene00003532
WBGene00003159	WBGene00004348	WBGene00003375	WBGene00003555
WBGene00003161	WBGene00004350	WBGene00003377	WBGene00003558
WBGene00003162	WBGene00004355	WBGene00003378	WBGene00003559
WBGene00003163	WBGene00004356	WBGene00003387	WBGene00003561
WBGene00003164	WBGene00004357	WBGene00003388	WBGene00003563
WBGene00003166	WBGene00004358	WBGene00003389	WBGene00003566
WBGene00003168	WBGene00004359	WBGene00003390	WBGene00003567
WBGene00003170	WBGene00004360	WBGene00003391	WBGene00003568
WBGene00003171	WBGene00004361	WBGene00003392	WBGene00003569
WBGene00003172	WBGene00004367	WBGene00003393	WBGene00003570
WBGene00003174	WBGene00004368	WBGene00003394	WBGene00003571
WBGene00003175	WBGene00004371	WBGene00003396	WBGene00003572
WBGene00003177	WBGene00004373	WBGene00003397	WBGene00003576
WBGene00003178	WBGene00004377	WBGene00003400	WBGene00003578
WBGene00003182	WBGene00004378	WBGene00003401	WBGene00003579
WBGene00003183	WBGene00004381	WBGene00003404	WBGene00003580
WBGene00003185	WBGene00004382	WBGene00003405	WBGene00003581
WBGene00003186	WBGene00004383	WBGene00003406	WBGene00003582
WBGene00003209	WBGene00004385	WBGene00003407	WBGene00003583
WBGene00003214	WBGene00004386	WBGene00003408	WBGene00003584
WBGene00003220	WBGene00004387	WBGene00003411	WBGene00003585
WBGene00003224	WBGene00004388	WBGene00003415	WBGene00003586
WBGene00003225	WBGene00004389	WBGene00003417	WBGene00003587
WBGene00003229	WBGene00004390	WBGene00003418	WBGene00003589
WBGene00003232	WBGene00004391	WBGene00003421	WBGene00003592
WBGene00003234	WBGene00004392	WBGene00003422	WBGene00003594
WBGene00003235	WBGene00004393	WBGene00003423	WBGene00003595
WBGene00003236	WBGene00004400	WBGene00003472	WBGene00003596
WBGene00003239	WBGene00004402	WBGene00003475	WBGene00003597
WBGene00003241	WBGene00004405	WBGene00003476	WBGene00003605
WBGene00003242	WBGene00004408	WBGene00003477	WBGene00003622
WBGene00003243	WBGene00004409	WBGene00003478	WBGene00003623
WBGene00003246	WBGene00004411	WBGene00003479	WBGene00003639
WBGene00003247	WBGene00004412	WBGene00003480	WBGene00003654
WBGene00003253	WBGene00004413	WBGene00003482	WBGene00003657
WBGene00003254	WBGene00004414	WBGene00003485	WBGene00003659
WBGene00003367	WBGene00004415	WBGene00003504	WBGene00003681
WBGene00003368	WBGene00004416	WBGene00003509	WBGene00003729
WBGene00003373	WBGene00004417	WBGene00003510	WBGene00003730
WBGene00003374	WBGene00004418	WBGene00003514	WBGene00003731
WBGene00003375	WBGene00004419	WBGene00003515	WBGene00003733
WBGene00003376	WBGene00004420	WBGene00003516	WBGene00003734
WBGene00003377	WBGene00004421	WBGene00003517	WBGene00003735
WBGene00003378	WBGene00004422	WBGene00003519	WBGene00003736
WBGene00003384	WBGene00004423	WBGene00003523	WBGene00003738
WBGene00003385	WBGene00004425	WBGene00003526	WBGene00003772
WBGene00003387	WBGene00004426	WBGene00003527	WBGene00003774
WBGene00003389	WBGene00004427	WBGene00003555	WBGene00003775
WBGene00003390	WBGene00004428	WBGene00003558	WBGene00003776
WBGene00003391	WBGene00004429	WBGene00003561	WBGene00003777
WBGene00003392	WBGene00004430	WBGene00003563	WBGene00003778
WBGene00003393	WBGene00004431	WBGene00003567	WBGene00003787
WBGene00003394	WBGene00004432	WBGene00003569	WBGene00003788
WBGene00003395	WBGene00004433	WBGene00003572	WBGene00003789
WBGene00003400	WBGene00004434	WBGene00003573	WBGene00003793
WBGene00003401	WBGene00004435	WBGene00003574	WBGene00003794
WBGene00003402	WBGene00004436	WBGene00003575	WBGene00003795
WBGene00003404	WBGene00004437	WBGene00003576	WBGene00003796
WBGene00003405	WBGene00004438	WBGene00003579	WBGene00003797
WBGene00003407	WBGene00004439	WBGene00003580	WBGene00003798
WBGene00003408	WBGene00004440	WBGene00003581	WBGene00003799
WBGene00003409	WBGene00004441	WBGene00003582	WBGene00003800
WBGene00003410	WBGene00004444	WBGene00003583	WBGene00003802
WBGene00003411	WBGene00004445	WBGene00003584	WBGene00003803
WBGene00003412	WBGene00004446	WBGene00003585	WBGene00003804
WBGene00003413	WBGene00004447	WBGene00003586	WBGene00003805
WBGene00003414	WBGene00004448	WBGene00003587	WBGene00003806
WBGene00003415	WBGene00004449	WBGene00003589	WBGene00003815
WBGene00003417	WBGene00004451	WBGene00003592	WBGene00003816
WBGene00003418	WBGene00004452	WBGene00003594	WBGene00003818
WBGene00003421	WBGene00004454	WBGene00003595	WBGene00003821
WBGene00003422	WBGene00004456	WBGene00003596	WBGene00003822
WBGene00003423	WBGene00004457	WBGene00003597	WBGene00003825
WBGene00003472	WBGene00004458	WBGene00003605	WBGene00003826
WBGene00003475	WBGene00004460	WBGene00003607	WBGene00003827
WBGene00003476	WBGene00004461	WBGene00003622	WBGene00003828
WBGene00003477	WBGene00004462	WBGene00003623	WBGene00003829
WBGene00003478	WBGene00004463	WBGene00003654	WBGene00003830
WBGene00003480	WBGene00004464	WBGene00003675	WBGene00003831
WBGene00003485	WBGene00004465	WBGene00003681	WBGene00003834
WBGene00003495	WBGene00004466	WBGene00003731	WBGene00003836
WBGene00003499	WBGene00004467	WBGene00003733	WBGene00003844
WBGene00003504	WBGene00004468	WBGene00003735	WBGene00003846
WBGene00003507	WBGene00004470	WBGene00003736	WBGene00003847
WBGene00003509	WBGene00004471	WBGene00003738	WBGene00003850
WBGene00003510	WBGene00004472	WBGene00003772	WBGene00003858
WBGene00003511	WBGene00004473	WBGene00003773	WBGene00003870
WBGene00003514	WBGene00004474	WBGene00003774	WBGene00003876
WBGene00003515	WBGene00004475	WBGene00003775	WBGene00003877
WBGene00003516	WBGene00004476	WBGene00003776	WBGene00003878
WBGene00003517	WBGene00004477	WBGene00003778	WBGene00003882
WBGene00003518	WBGene00004478	WBGene00003779	WBGene00003883
WBGene00003519	WBGene00004479	WBGene00003787	WBGene00003884
WBGene00003520	WBGene00004480	WBGene00003788	WBGene00003885
WBGene00003521	WBGene00004481	WBGene00003789	WBGene00003886
WBGene00003522	WBGene00004482	WBGene00003792	WBGene00003889
WBGene00003524	WBGene00004483	WBGene00003794	WBGene00003892
WBGene00003525	WBGene00004484	WBGene00003796	WBGene00003893
WBGene00003526	WBGene00004485	WBGene00003797	WBGene00003898
WBGene00003527	WBGene00004486	WBGene00003798	WBGene00003901
WBGene00003531	WBGene00004487	WBGene00003799	WBGene00003902
WBGene00003555	WBGene00004488	WBGene00003800	WBGene00003903
WBGene00003558	WBGene00004489	WBGene00003801	WBGene00003904
WBGene00003561	WBGene00004490	WBGene00003803	WBGene00003905
WBGene00003562	WBGene00004491	WBGene00003804	WBGene00003906
WBGene00003563	WBGene00004492	WBGene00003806	WBGene00003907
WBGene00003564	WBGene00004494	WBGene00003815	WBGene00003909
WBGene00003566	WBGene00004495	WBGene00003816	WBGene00003911
WBGene00003567	WBGene00004496	WBGene00003818	WBGene00003912
WBGene00003569	WBGene00004497	WBGene00003821	WBGene00003914
WBGene00003570	WBGene00004498	WBGene00003822	WBGene00003916
WBGene00003571	WBGene00004499	WBGene00003825	WBGene00003918
WBGene00003572	WBGene00004501	WBGene00003826	WBGene00003919
WBGene00003573	WBGene00004502	WBGene00003827	WBGene00003920
WBGene00003574	WBGene00004503	WBGene00003829	WBGene00003921
WBGene00003575	WBGene00004504	WBGene00003830	WBGene00003922
WBGene00003576	WBGene00004505	WBGene00003831	WBGene00003923
WBGene00003578	WBGene00004506	WBGene00003834	WBGene00003924
WBGene00003579	WBGene00004507	WBGene00003835	WBGene00003925
WBGene00003580	WBGene00004679	WBGene00003836	WBGene00003926
WBGene00003581	WBGene00004682	WBGene00003838	WBGene00003927
WBGene00003582	WBGene00004698	WBGene00003839	WBGene00003928
WBGene00003583	WBGene00004699	WBGene00003840	WBGene00003929
WBGene00003584	WBGene00004700	WBGene00003841	WBGene00003930
WBGene00003585	WBGene00004703	WBGene00003842	WBGene00003931
WBGene00003586	WBGene00004704	WBGene00003844	WBGene00003932
WBGene00003587	WBGene00004705	WBGene00003846	WBGene00003937
WBGene00003588	WBGene00004706	WBGene00003847	WBGene00003938
WBGene00003589	WBGene00004727	WBGene00003851	WBGene00003939
WBGene00003590	WBGene00004728	WBGene00003858	WBGene00003943
WBGene00003591	WBGene00004729	WBGene00003864	WBGene00003947
WBGene00003592	WBGene00004735	WBGene00003865	WBGene00003948
WBGene00003593	WBGene00004736	WBGene00003870	WBGene00003949
WBGene00003594	WBGene00004738	WBGene00003876	WBGene00003950
WBGene00003595	WBGene00004740	WBGene00003877	WBGene00003951
WBGene00003596	WBGene00004742	WBGene00003882	WBGene00003952
WBGene00003599	WBGene00004743	WBGene00003883	WBGene00003953
WBGene00003605	WBGene00004744	WBGene00003884	WBGene00003954
WBGene00003613	WBGene00004752	WBGene00003885	WBGene00003955
WBGene00003622	WBGene00004753	WBGene00003886	WBGene00003956
WBGene00003628	WBGene00004754	WBGene00003889	WBGene00003957
WBGene00003639	WBGene00004755	WBGene00003892	WBGene00003958
WBGene00003654	WBGene00004756	WBGene00003893	WBGene00003959
WBGene00003657	WBGene00004758	WBGene00003898	WBGene00003961
WBGene00003659	WBGene00004759	WBGene00003901	WBGene00003963
WBGene00003675	WBGene00004760	WBGene00003902	WBGene00003964
WBGene00003681	WBGene00004766	WBGene00003903	WBGene00003965
WBGene00003729	WBGene00004767	WBGene00003904	WBGene00003966
WBGene00003730	WBGene00004768	WBGene00003905	WBGene00003967
WBGene00003731	WBGene00004769	WBGene00003906	WBGene00003969
WBGene00003732	WBGene00004774	WBGene00003907	WBGene00003970
WBGene00003733	WBGene00004776	WBGene00003911	WBGene00003975
WBGene00003734	WBGene00004777	WBGene00003914	WBGene00003978
WBGene00003735	WBGene00004779	WBGene00003915	WBGene00003980
WBGene00003736	WBGene00004780	WBGene00003916	WBGene00003982
WBGene00003738	WBGene00004781	WBGene00003918	WBGene00003989
WBGene00003774	WBGene00004782	WBGene00003919	WBGene00003991
WBGene00003775	WBGene00004787	WBGene00003920	WBGene00003995
WBGene00003778	WBGene00004788	WBGene00003921	WBGene00003996
WBGene00003779	WBGene00004789	WBGene00003922	WBGene00003997
WBGene00003785	WBGene00004790	WBGene00003923	WBGene00003998
WBGene00003787	WBGene00004800	WBGene00003924	WBGene00003999
WBGene00003788	WBGene00004801	WBGene00003925	WBGene00004000
WBGene00003789	WBGene00004802	WBGene00003926	WBGene00004001
WBGene00003790	WBGene00004806	WBGene00003927	WBGene00004002
WBGene00003793	WBGene00004807	WBGene00003928	WBGene00004003
WBGene00003794	WBGene00004808	WBGene00003929	WBGene00004004
WBGene00003796	WBGene00004829	WBGene00003930	WBGene00004005
WBGene00003798	WBGene00004830	WBGene00003931	WBGene00004006
WBGene00003799	WBGene00004831	WBGene00003932	WBGene00004007
WBGene00003800	WBGene00004854	WBGene00003938	WBGene00004008
WBGene00003801	WBGene00004855	WBGene00003947	WBGene00004011
WBGene00003802	WBGene00004856	WBGene00003948	WBGene00004013
WBGene00003803	WBGene00004860	WBGene00003949	WBGene00004014
WBGene00003804	WBGene00004873	WBGene00003950	WBGene00004015
WBGene00003805	WBGene00004875	WBGene00003951	WBGene00004016
WBGene00003806	WBGene00004876	WBGene00003952	WBGene00004017
WBGene00003807	WBGene00004877	WBGene00003953	WBGene00004024
WBGene00003808	WBGene00004878	WBGene00003954	WBGene00004025
WBGene00003815	WBGene00004880	WBGene00003955	WBGene00004028
WBGene00003816	WBGene00004882	WBGene00003961	WBGene00004031
WBGene00003818	WBGene00004888	WBGene00003963	WBGene00004032
WBGene00003821	WBGene00004891	WBGene00003964	WBGene00004033
WBGene00003822	WBGene00004892	WBGene00003965	WBGene00004034
WBGene00003825	WBGene00004895	WBGene00003966	WBGene00004035
WBGene00003826	WBGene00004896	WBGene00003967	WBGene00004036
WBGene00003827	WBGene00004897	WBGene00003969	WBGene00004038
WBGene00003828	WBGene00004905	WBGene00003970	WBGene00004039
WBGene00003829	WBGene00004910	WBGene00003975	WBGene00004040
WBGene00003830	WBGene00004912	WBGene00003976	WBGene00004042
WBGene00003831	WBGene00004913	WBGene00003978	WBGene00004043
WBGene00003834	WBGene00004914	WBGene00003980	WBGene00004044
WBGene00003835	WBGene00004916	WBGene00003986	WBGene00004045
WBGene00003836	WBGene00004917	WBGene00003995	WBGene00004046
WBGene00003838	WBGene00004918	WBGene00004003	WBGene00004047
WBGene00003839	WBGene00004919	WBGene00004014	WBGene00004048
WBGene00003840	WBGene00004920	WBGene00004015	WBGene00004049
WBGene00003841	WBGene00004921	WBGene00004016	WBGene00004051
WBGene00003843	WBGene00004927	WBGene00004024	WBGene00004052
WBGene00003846	WBGene00004929	WBGene00004025	WBGene00004055
WBGene00003847	WBGene00004930	WBGene00004028	WBGene00004058
WBGene00003851	WBGene00004931	WBGene00004029	WBGene00004059
WBGene00003858	WBGene00004932	WBGene00004031	WBGene00004060
WBGene00003870	WBGene00004947	WBGene00004032	WBGene00004061
WBGene00003876	WBGene00004951	WBGene00004033	WBGene00004063
WBGene00003877	WBGene00004959	WBGene00004034	WBGene00004064
WBGene00003878	WBGene00004969	WBGene00004035	WBGene00004068
WBGene00003882	WBGene00004975	WBGene00004036	WBGene00004075
WBGene00003883	WBGene00004978	WBGene00004038	WBGene00004076
WBGene00003884	WBGene00004980	WBGene00004039	WBGene00004077
WBGene00003885	WBGene00005007	WBGene00004040	WBGene00004083
WBGene00003886	WBGene00005010	WBGene00004042	WBGene00004085
WBGene00003889	WBGene00005014	WBGene00004043	WBGene00004086
WBGene00003892	WBGene00005015	WBGene00004045	WBGene00004087
WBGene00003893	WBGene00005019	WBGene00004046	WBGene00004088
WBGene00003898	WBGene00005020	WBGene00004047	WBGene00004089
WBGene00003901	WBGene00005021	WBGene00004049	WBGene00004090
WBGene00003904	WBGene00005022	WBGene00004051	WBGene00004091
WBGene00003905	WBGene00005023	WBGene00004052	WBGene00004092
WBGene00003906	WBGene00005025	WBGene00004055	WBGene00004095
WBGene00003907	WBGene00005026	WBGene00004058	WBGene00004101
WBGene00003909	WBGene00005077	WBGene00004059	WBGene00004109
WBGene00003911	WBGene00005078	WBGene00004060	WBGene00004114
WBGene00003912	WBGene00005662	WBGene00004061	WBGene00004117
WBGene00003914	WBGene00005663	WBGene00004063	WBGene00004121
WBGene00003915	WBGene00006059	WBGene00004064	WBGene00004130
WBGene00003916	WBGene00006061	WBGene00004068	WBGene00004131
WBGene00003918	WBGene00006062	WBGene00004075	WBGene00004134
WBGene00003919	WBGene00006064	WBGene00004076	WBGene00004136
WBGene00003920	WBGene00006307	WBGene00004077	WBGene00004140
WBGene00003921	WBGene00006308	WBGene00004085	WBGene00004147
WBGene00003922	WBGene00006309	WBGene00004087	WBGene00004151
WBGene00003923	WBGene00006310	WBGene00004088	WBGene00004166
WBGene00003924	WBGene00006318	WBGene00004089	WBGene00004178
WBGene00003925	WBGene00006321	WBGene00004090	WBGene00004179
WBGene00003926	WBGene00006349	WBGene00004091	WBGene00004180
WBGene00003927	WBGene00006351	WBGene00004092	WBGene00004181
WBGene00003928	WBGene00006352	WBGene00004095	WBGene00004183
WBGene00003929	WBGene00006359	WBGene00004101	WBGene00004184
WBGene00003930	WBGene00006364	WBGene00004109	WBGene00004185
WBGene00003931	WBGene00006366	WBGene00004117	WBGene00004186
WBGene00003932	WBGene00006367	WBGene00004121	WBGene00004187
WBGene00003937	WBGene00006368	WBGene00004130	WBGene00004188
WBGene00003938	WBGene00006369	WBGene00004131	WBGene00004189
WBGene00003939	WBGene00006373	WBGene00004132	WBGene00004190
WBGene00003941	WBGene00006382	WBGene00004134	WBGene00004191
WBGene00003943	WBGene00006383	WBGene00004136	WBGene00004192
WBGene00003947	WBGene00006386	WBGene00004140	WBGene00004193
WBGene00003948	WBGene00006387	WBGene00004143	WBGene00004194
WBGene00003949	WBGene00006388	WBGene00004151	WBGene00004195
WBGene00003950	WBGene00006389	WBGene00004166	WBGene00004196
WBGene00003951	WBGene00006394	WBGene00004178	WBGene00004197
WBGene00003952	WBGene00006397	WBGene00004179	WBGene00004198
WBGene00003953	WBGene00006402	WBGene00004180	WBGene00004199
WBGene00003954	WBGene00006405	WBGene00004181	WBGene00004201
WBGene00003955	WBGene00006407	WBGene00004183	WBGene00004203
WBGene00003956	WBGene00006410	WBGene00004184	WBGene00004204
WBGene00003957	WBGene00006412	WBGene00004185	WBGene00004205
WBGene00003958	WBGene00006414	WBGene00004186	WBGene00004206
WBGene00003959	WBGene00006415	WBGene00004187	WBGene00004207
WBGene00003961	WBGene00006416	WBGene00004188	WBGene00004208
WBGene00003962	WBGene00006418	WBGene00004190	WBGene00004209
WBGene00003963	WBGene00006424	WBGene00004191	WBGene00004210
WBGene00003964	WBGene00006432	WBGene00004192	WBGene00004211
WBGene00003965	WBGene00006433	WBGene00004193	WBGene00004212
WBGene00003966	WBGene00006434	WBGene00004194	WBGene00004213
WBGene00003967	WBGene00006435	WBGene00004195	WBGene00004214
WBGene00003969	WBGene00006437	WBGene00004196	WBGene00004215
WBGene00003970	WBGene00006438	WBGene00004197	WBGene00004217
WBGene00003975	WBGene00006439	WBGene00004198	WBGene00004224
WBGene00003978	WBGene00006442	WBGene00004199	WBGene00004233
WBGene00003980	WBGene00006443	WBGene00004201	WBGene00004244
WBGene00003982	WBGene00006444	WBGene00004203	WBGene00004245
WBGene00003986	WBGene00006446	WBGene00004204	WBGene00004248
WBGene00003996	WBGene00006447	WBGene00004205	WBGene00004254
WBGene00004011	WBGene00006448	WBGene00004206	WBGene00004255
WBGene00004013	WBGene00006460	WBGene00004207	WBGene00004256
WBGene00004014	WBGene00006461	WBGene00004208	WBGene00004257
WBGene00004015	WBGene00006463	WBGene00004210	WBGene00004258
WBGene00004016	WBGene00006465	WBGene00004213	WBGene00004259
WBGene00004020	WBGene00006467	WBGene00004214	WBGene00004264
WBGene00004023	WBGene00006470	WBGene00004215	WBGene00004266
WBGene00004024	WBGene00006472	WBGene00004217	WBGene00004267
WBGene00004025	WBGene00006473	WBGene00004224	WBGene00004268
WBGene00004028	WBGene00006474	WBGene00004233	WBGene00004269
WBGene00004029	WBGene00006477	WBGene00004245	WBGene00004270
WBGene00004031	WBGene00006478	WBGene00004248	WBGene00004271
WBGene00004032	WBGene00006479	WBGene00004249	WBGene00004272
WBGene00004033	WBGene00006481	WBGene00004254	WBGene00004273
WBGene00004034	WBGene00006483	WBGene00004255	WBGene00004274
WBGene00004035	WBGene00006486	WBGene00004256	WBGene00004276
WBGene00004036	WBGene00006490	WBGene00004257	WBGene00004277
WBGene00004038	WBGene00006491	WBGene00004258	WBGene00004278
WBGene00004039	WBGene00006493	WBGene00004259	WBGene00004279
WBGene00004040	WBGene00006494	WBGene00004266	WBGene00004281
WBGene00004042	WBGene00006497	WBGene00004267	WBGene00004282
WBGene00004043	WBGene00006498	WBGene00004268	WBGene00004283
WBGene00004044	WBGene00006503	WBGene00004270	WBGene00004284
WBGene00004045	WBGene00006504	WBGene00004271	WBGene00004285
WBGene00004046	WBGene00006505	WBGene00004272	WBGene00004286
WBGene00004047	WBGene00006510	WBGene00004273	WBGene00004287
WBGene00004048	WBGene00006512	WBGene00004274	WBGene00004296
WBGene00004049	WBGene00006515	WBGene00004276	WBGene00004297
WBGene00004051	WBGene00006517	WBGene00004277	WBGene00004298
WBGene00004052	WBGene00006518	WBGene00004278	WBGene00004302
WBGene00004055	WBGene00006520	WBGene00004279	WBGene00004303
WBGene00004056	WBGene00006525	WBGene00004281	WBGene00004304
WBGene00004057	WBGene00006526	WBGene00004282	WBGene00004305
WBGene00004058	WBGene00006527	WBGene00004283	WBGene00004306
WBGene00004059	WBGene00006528	WBGene00004284	WBGene00004307
WBGene00004060	WBGene00006529	WBGene00004285	WBGene00004308
WBGene00004061	WBGene00006530	WBGene00004286	WBGene00004309
WBGene00004062	WBGene00006531	WBGene00004287	WBGene00004310
WBGene00004063	WBGene00006533	WBGene00004296	WBGene00004311
WBGene00004064	WBGene00006535	WBGene00004297	WBGene00004312
WBGene00004068	WBGene00006536	WBGene00004298	WBGene00004313
WBGene00004075	WBGene00006537	WBGene00004300	WBGene00004314
WBGene00004076	WBGene00006538	WBGene00004302	WBGene00004315
WBGene00004077	WBGene00006541	WBGene00004304	WBGene00004316
WBGene00004085	WBGene00006542	WBGene00004305	WBGene00004317
WBGene00004086	WBGene00006543	WBGene00004307	WBGene00004318
WBGene00004087	WBGene00006563	WBGene00004308	WBGene00004319
WBGene00004088	WBGene00006565	WBGene00004310	WBGene00004320
WBGene00004089	WBGene00006566	WBGene00004311	WBGene00004321
WBGene00004090	WBGene00006567	WBGene00004314	WBGene00004322
WBGene00004091	WBGene00006568	WBGene00004315	WBGene00004335
WBGene00004092	WBGene00006573	WBGene00004317	WBGene00004336
WBGene00004095	WBGene00006575	WBGene00004318	WBGene00004337
WBGene00004101	WBGene00006577	WBGene00004319	WBGene00004338
WBGene00004109	WBGene00006578	WBGene00004320	WBGene00004339
WBGene00004115	WBGene00006579	WBGene00004321	WBGene00004340
WBGene00004117	WBGene00006590	WBGene00004322	WBGene00004341
WBGene00004121	WBGene00006594	WBGene00004335	WBGene00004343
WBGene00004130	WBGene00006595	WBGene00004336	WBGene00004344
WBGene00004131	WBGene00006596	WBGene00004337	WBGene00004345
WBGene00004134	WBGene00006597	WBGene00004338	WBGene00004348
WBGene00004135	WBGene00006598	WBGene00004339	WBGene00004350
WBGene00004136	WBGene00006599	WBGene00004340	WBGene00004355
WBGene00004140	WBGene00006600	WBGene00004341	WBGene00004356
WBGene00004143	WBGene00006606	WBGene00004343	WBGene00004357
WBGene00004146	WBGene00006607	WBGene00004344	WBGene00004358
WBGene00004147	WBGene00006612	WBGene00004345	WBGene00004359
WBGene00004151	WBGene00006613	WBGene00004348	WBGene00004360
WBGene00004166	WBGene00006614	WBGene00004355	WBGene00004361
WBGene00004178	WBGene00006615	WBGene00004356	WBGene00004364
WBGene00004179	WBGene00006617	WBGene00004357	WBGene00004367
WBGene00004180	WBGene00006619	WBGene00004358	WBGene00004368
WBGene00004181	WBGene00006620	WBGene00004361	WBGene00004371
WBGene00004183	WBGene00006626	WBGene00004363	WBGene00004372
WBGene00004184	WBGene00006633	WBGene00004364	WBGene00004373
WBGene00004185	WBGene00006634	WBGene00004367	WBGene00004375
WBGene00004186	WBGene00006635	WBGene00004368	WBGene00004377
WBGene00004187	WBGene00006638	WBGene00004371	WBGene00004378
WBGene00004188	WBGene00006647	WBGene00004372	WBGene00004381
WBGene00004189	WBGene00006648	WBGene00004373	WBGene00004383
WBGene00004190	WBGene00006654	WBGene00004375	WBGene00004385
WBGene00004191	WBGene00006655	WBGene00004377	WBGene00004386
WBGene00004192	WBGene00006656	WBGene00004378	WBGene00004387
WBGene00004193	WBGene00006657	WBGene00004381	WBGene00004388
WBGene00004194	WBGene00006658	WBGene00004382	WBGene00004389
WBGene00004195	WBGene00006662	WBGene00004383	WBGene00004390
WBGene00004197	WBGene00006663	WBGene00004385	WBGene00004391
WBGene00004198	WBGene00006665	WBGene00004386	WBGene00004392
WBGene00004199	WBGene00006668	WBGene00004387	WBGene00004393
WBGene00004201	WBGene00006669	WBGene00004388	WBGene00004395
WBGene00004203	WBGene00006671	WBGene00004389	WBGene00004400
WBGene00004204	WBGene00006672	WBGene00004390	WBGene00004401
WBGene00004205	WBGene00006675	WBGene00004391	WBGene00004402
WBGene00004206	WBGene00006677	WBGene00004392	WBGene00004403
WBGene00004207	WBGene00006678	WBGene00004393	WBGene00004404
WBGene00004208	WBGene00006680	WBGene00004395	WBGene00004405
WBGene00004209	WBGene00006682	WBGene00004397	WBGene00004408
WBGene00004210	WBGene00006683	WBGene00004398	WBGene00004409
WBGene00004211	WBGene00006684	WBGene00004400	WBGene00004410
WBGene00004213	WBGene00006691	WBGene00004402	WBGene00004411
WBGene00004214	WBGene00006692	WBGene00004403	WBGene00004412
WBGene00004215	WBGene00006696	WBGene00004404	WBGene00004413
WBGene00004216	WBGene00006697	WBGene00004405	WBGene00004414
WBGene00004217	WBGene00006698	WBGene00004408	WBGene00004415
WBGene00004218	WBGene00006699	WBGene00004409	WBGene00004416
WBGene00004219	WBGene00006700	WBGene00004411	WBGene00004417
WBGene00004220	WBGene00006701	WBGene00004412	WBGene00004418
WBGene00004221	WBGene00006702	WBGene00004413	WBGene00004419
WBGene00004222	WBGene00006703	WBGene00004414	WBGene00004420
WBGene00004223	WBGene00006707	WBGene00004415	WBGene00004421
WBGene00004224	WBGene00006708	WBGene00004416	WBGene00004422
WBGene00004225	WBGene00006709	WBGene00004417	WBGene00004423
WBGene00004226	WBGene00006711	WBGene00004418	WBGene00004424
WBGene00004227	WBGene00006713	WBGene00004419	WBGene00004425
WBGene00004228	WBGene00006715	WBGene00004420	WBGene00004426
WBGene00004229	WBGene00006716	WBGene00004421	WBGene00004427
WBGene00004230	WBGene00006720	WBGene00004422	WBGene00004428
WBGene00004231	WBGene00006724	WBGene00004423	WBGene00004429
WBGene00004232	WBGene00006727	WBGene00004424	WBGene00004430
WBGene00004233	WBGene00006728	WBGene00004425	WBGene00004431
WBGene00004234	WBGene00006729	WBGene00004426	WBGene00004432
WBGene00004235	WBGene00006730	WBGene00004427	WBGene00004433
WBGene00004236	WBGene00006733	WBGene00004428	WBGene00004434
WBGene00004237	WBGene00006734	WBGene00004429	WBGene00004435
WBGene00004239	WBGene00006742	WBGene00004430	WBGene00004436
WBGene00004241	WBGene00006743	WBGene00004431	WBGene00004437
WBGene00004242	WBGene00006745	WBGene00004432	WBGene00004438
WBGene00004243	WBGene00006746	WBGene00004433	WBGene00004439
WBGene00004248	WBGene00006748	WBGene00004434	WBGene00004440
WBGene00004254	WBGene00006750	WBGene00004435	WBGene00004441
WBGene00004255	WBGene00006751	WBGene00004436	WBGene00004442
WBGene00004256	WBGene00006755	WBGene00004437	WBGene00004443
WBGene00004257	WBGene00006756	WBGene00004438	WBGene00004444
WBGene00004258	WBGene00006757	WBGene00004439	WBGene00004445
WBGene00004259	WBGene00006759	WBGene00004440	WBGene00004446
WBGene00004264	WBGene00006760	WBGene00004441	WBGene00004447
WBGene00004266	WBGene00006761	WBGene00004442	WBGene00004448
WBGene00004267	WBGene00006762	WBGene00004444	WBGene00004449
WBGene00004268	WBGene00006763	WBGene00004445	WBGene00004450
WBGene00004269	WBGene00006766	WBGene00004446	WBGene00004451
WBGene00004270	WBGene00006767	WBGene00004447	WBGene00004452
WBGene00004271	WBGene00006768	WBGene00004448	WBGene00004453
WBGene00004272	WBGene00006770	WBGene00004449	WBGene00004454
WBGene00004273	WBGene00006771	WBGene00004450	WBGene00004456
WBGene00004274	WBGene00006772	WBGene00004451	WBGene00004457
WBGene00004275	WBGene00006774	WBGene00004452	WBGene00004458
WBGene00004276	WBGene00006776	WBGene00004453	WBGene00004459
WBGene00004277	WBGene00006779	WBGene00004454	WBGene00004460
WBGene00004278	WBGene00006780	WBGene00004456	WBGene00004461
WBGene00004279	WBGene00006781	WBGene00004457	WBGene00004462
WBGene00004281	WBGene00006783	WBGene00004458	WBGene00004463
WBGene00004282	WBGene00006785	WBGene00004459	WBGene00004464
WBGene00004283	WBGene00006786	WBGene00004460	WBGene00004465
WBGene00004285	WBGene00006787	WBGene00004461	WBGene00004466
WBGene00004286	WBGene00006788	WBGene00004462	WBGene00004467
WBGene00004287	WBGene00006789	WBGene00004463	WBGene00004468
WBGene00004296	WBGene00006790	WBGene00004464	WBGene00004469
WBGene00004297	WBGene00006791	WBGene00004465	WBGene00004470
WBGene00004298	WBGene00006792	WBGene00004466	WBGene00004471
WBGene00004302	WBGene00006793	WBGene00004467	WBGene00004472
WBGene00004303	WBGene00006795	WBGene00004468	WBGene00004473
WBGene00004304	WBGene00006796	WBGene00004469	WBGene00004474
WBGene00004305	WBGene00006797	WBGene00004470	WBGene00004475
WBGene00004306	WBGene00006798	WBGene00004471	WBGene00004476
WBGene00004307	WBGene00006801	WBGene00004472	WBGene00004477
WBGene00004308	WBGene00006803	WBGene00004473	WBGene00004478
WBGene00004310	WBGene00006804	WBGene00004474	WBGene00004479
WBGene00004311	WBGene00006805	WBGene00004475	WBGene00004480
WBGene00004312	WBGene00006807	WBGene00004476	WBGene00004481
WBGene00004313	WBGene00006808	WBGene00004477	WBGene00004482
WBGene00004314	WBGene00006809	WBGene00004478	WBGene00004483
WBGene00004315	WBGene00006810	WBGene00004479	WBGene00004484
WBGene00004316	WBGene00006817	WBGene00004480	WBGene00004485
WBGene00004317	WBGene00006818	WBGene00004481	WBGene00004486
WBGene00004318	WBGene00006822	WBGene00004482	WBGene00004487
WBGene00004319	WBGene00006823	WBGene00004483	WBGene00004488
WBGene00004320	WBGene00006826	WBGene00004484	WBGene00004489
WBGene00004321	WBGene00006829	WBGene00004485	WBGene00004490
WBGene00004322	WBGene00006830	WBGene00004486	WBGene00004491
WBGene00004335	WBGene00006831	WBGene00004487	WBGene00004492
WBGene00004336	WBGene00006832	WBGene00004488	WBGene00004493
WBGene00004337	WBGene00006833	WBGene00004489	WBGene00004494
WBGene00004338	WBGene00006836	WBGene00004491	WBGene00004495
WBGene00004339	WBGene00006839	WBGene00004492	WBGene00004496
WBGene00004340	WBGene00006840	WBGene00004493	WBGene00004497
WBGene00004341	WBGene00006843	WBGene00004494	WBGene00004498
WBGene00004343	WBGene00006853	WBGene00004495	WBGene00004499
WBGene00004344	WBGene00006856	WBGene00004496	WBGene00004501
WBGene00004345	WBGene00006862	WBGene00004498	WBGene00004502
WBGene00004348	WBGene00006863	WBGene00004499	WBGene00004503
WBGene00004349	WBGene00006864	WBGene00004501	WBGene00004504
WBGene00004350	WBGene00006870	WBGene00004502	WBGene00004505
WBGene00004355	WBGene00006876	WBGene00004503	WBGene00004506
WBGene00004356	WBGene00006886	WBGene00004504	WBGene00004507
WBGene00004357	WBGene00006887	WBGene00004505	WBGene00004508
WBGene00004358	WBGene00006888	WBGene00004506	WBGene00004509
WBGene00004359	WBGene00006889	WBGene00004507	WBGene00004510
WBGene00004360	WBGene00006890	WBGene00004679	WBGene00004679
WBGene00004361	WBGene00006894	WBGene00004680	WBGene00004680
WBGene00004364	WBGene00006896	WBGene00004682	WBGene00004682
WBGene00004367	WBGene00006897	WBGene00004698	WBGene00004698
WBGene00004368	WBGene00006910	WBGene00004700	WBGene00004700
WBGene00004371	WBGene00006913	WBGene00004701	WBGene00004701
WBGene00004372	WBGene00006917	WBGene00004703	WBGene00004703
WBGene00004373	WBGene00006918	WBGene00004704	WBGene00004704
WBGene00004375	WBGene00006919	WBGene00004705	WBGene00004705
WBGene00004377	WBGene00006921	WBGene00004706	WBGene00004706
WBGene00004378	WBGene00006923	WBGene00004719	WBGene00004719
WBGene00004381	WBGene00006924	WBGene00004723	WBGene00004723
WBGene00004382	WBGene00006931	WBGene00004727	WBGene00004727
WBGene00004383	WBGene00006932	WBGene00004728	WBGene00004728
WBGene00004384	WBGene00006933	WBGene00004729	WBGene00004729
WBGene00004385	WBGene00006934	WBGene00004732	WBGene00004732
WBGene00004386	WBGene00006936	WBGene00004735	WBGene00004735
WBGene00004387	WBGene00006937	WBGene00004736	WBGene00004736
WBGene00004388	WBGene00006944	WBGene00004738	WBGene00004737
WBGene00004389	WBGene00006945	WBGene00004740	WBGene00004738
WBGene00004390	WBGene00006946	WBGene00004742	WBGene00004740
WBGene00004391	WBGene00006957	WBGene00004743	WBGene00004742
WBGene00004393	WBGene00006958	WBGene00004744	WBGene00004743
WBGene00004400	WBGene00006960	WBGene00004749	WBGene00004744
WBGene00004401	WBGene00006961	WBGene00004752	WBGene00004749
WBGene00004402	WBGene00006963	WBGene00004753	WBGene00004752
WBGene00004403	WBGene00006964	WBGene00004754	WBGene00004753
WBGene00004404	WBGene00006968	WBGene00004755	WBGene00004754
WBGene00004405	WBGene00006974	WBGene00004756	WBGene00004755
WBGene00004408	WBGene00006987	WBGene00004758	WBGene00004756
WBGene00004409	WBGene00006993	WBGene00004759	WBGene00004758
WBGene00004410	WBGene00006994	WBGene00004760	WBGene00004759
WBGene00004411	WBGene00006996	WBGene00004762	WBGene00004760
WBGene00004412	WBGene00006997	WBGene00004766	WBGene00004762
WBGene00004413	WBGene00007000	WBGene00004767	WBGene00004766
WBGene00004414	WBGene00007007	WBGene00004768	WBGene00004767
WBGene00004415	WBGene00007008	WBGene00004769	WBGene00004769
WBGene00004416	WBGene00007009	WBGene00004771	WBGene00004771
WBGene00004417	WBGene00007010	WBGene00004773	WBGene00004773
WBGene00004418	WBGene00007013	WBGene00004774	WBGene00004774
WBGene00004419	WBGene00007014	WBGene00004777	WBGene00004776
WBGene00004420	WBGene00007018	WBGene00004778	WBGene00004777
WBGene00004421	WBGene00007020	WBGene00004781	WBGene00004779
WBGene00004422	WBGene00007021	WBGene00004782	WBGene00004780
WBGene00004423	WBGene00007026	WBGene00004787	WBGene00004781
WBGene00004424	WBGene00007028	WBGene00004788	WBGene00004782
WBGene00004425	WBGene00007029	WBGene00004789	WBGene00004786
WBGene00004426	WBGene00007030	WBGene00004790	WBGene00004787
WBGene00004427	WBGene00007036	WBGene00004793	WBGene00004788
WBGene00004428	WBGene00007042	WBGene00004800	WBGene00004789
WBGene00004429	WBGene00007045	WBGene00004801	WBGene00004790
WBGene00004430	WBGene00007048	WBGene00004802	WBGene00004793
WBGene00004431	WBGene00007050	WBGene00004803	WBGene00004798
WBGene00004432	WBGene00007053	WBGene00004804	WBGene00004800
WBGene00004433	WBGene00007054	WBGene00004806	WBGene00004801
WBGene00004434	WBGene00007055	WBGene00004807	WBGene00004802
WBGene00004435	WBGene00007056	WBGene00004808	WBGene00004803
WBGene00004436	WBGene00007057	WBGene00004829	WBGene00004806
WBGene00004437	WBGene00007059	WBGene00004830	WBGene00004807
WBGene00004438	WBGene00007080	WBGene00004831	WBGene00004808
WBGene00004439	WBGene00007099	WBGene00004854	WBGene00004829
WBGene00004440	WBGene00007102	WBGene00004855	WBGene00004830
WBGene00004441	WBGene00007103	WBGene00004856	WBGene00004831
WBGene00004442	WBGene00007105	WBGene00004858	WBGene00004854
WBGene00004443	WBGene00007106	WBGene00004860	WBGene00004855
WBGene00004444	WBGene00007110	WBGene00004873	WBGene00004856
WBGene00004445	WBGene00007111	WBGene00004874	WBGene00004857
WBGene00004446	WBGene00007114	WBGene00004875	WBGene00004860
WBGene00004447	WBGene00007117	WBGene00004876	WBGene00004873
WBGene00004448	WBGene00007122	WBGene00004877	WBGene00004874
WBGene00004449	WBGene00007128	WBGene00004878	WBGene00004875
WBGene00004450	WBGene00007129	WBGene00004879	WBGene00004876
WBGene00004451	WBGene00007135	WBGene00004880	WBGene00004877
WBGene00004452	WBGene00007137	WBGene00004881	WBGene00004878
WBGene00004453	WBGene00007138	WBGene00004882	WBGene00004879
WBGene00004454	WBGene00007143	WBGene00004884	WBGene00004880
WBGene00004456	WBGene00007144	WBGene00004886	WBGene00004881
WBGene00004457	WBGene00007145	WBGene00004887	WBGene00004882
WBGene00004458	WBGene00007150	WBGene00004888	WBGene00004884
WBGene00004459	WBGene00007167	WBGene00004889	WBGene00004886
WBGene00004460	WBGene00007174	WBGene00004891	WBGene00004887
WBGene00004461	WBGene00007175	WBGene00004892	WBGene00004888
WBGene00004462	WBGene00007184	WBGene00004895	WBGene00004889
WBGene00004463	WBGene00007188	WBGene00004896	WBGene00004891
WBGene00004464	WBGene00007189	WBGene00004897	WBGene00004892
WBGene00004465	WBGene00007194	WBGene00004910	WBGene00004895
WBGene00004466	WBGene00007197	WBGene00004912	WBGene00004896
WBGene00004467	WBGene00007201	WBGene00004913	WBGene00004897
WBGene00004468	WBGene00007202	WBGene00004914	WBGene00004898
WBGene00004469	WBGene00007203	WBGene00004915	WBGene00004905
WBGene00004470	WBGene00007204	WBGene00004916	WBGene00004910
WBGene00004471	WBGene00007210	WBGene00004917	WBGene00004912
WBGene00004472	WBGene00007215	WBGene00004918	WBGene00004913
WBGene00004473	WBGene00007216	WBGene00004919	WBGene00004914
WBGene00004474	WBGene00007217	WBGene00004920	WBGene00004915
WBGene00004475	WBGene00007226	WBGene00004921	WBGene00004916
WBGene00004476	WBGene00007234	WBGene00004927	WBGene00004917
WBGene00004477	WBGene00007235	WBGene00004928	WBGene00004918
WBGene00004478	WBGene00007236	WBGene00004929	WBGene00004919
WBGene00004479	WBGene00007237	WBGene00004930	WBGene00004920
WBGene00004480	WBGene00007245	WBGene00004931	WBGene00004921
WBGene00004481	WBGene00007256	WBGene00004932	WBGene00004922
WBGene00004482	WBGene00007267	WBGene00004947	WBGene00004923
WBGene00004483	WBGene00007277	WBGene00004949	WBGene00004924
WBGene00004484	WBGene00007287	WBGene00004950	WBGene00004927
WBGene00004485	WBGene00007302	WBGene00004951	WBGene00004929
WBGene00004486	WBGene00007330	WBGene00004952	WBGene00004930
WBGene00004487	WBGene00007339	WBGene00004959	WBGene00004931
WBGene00004488	WBGene00007347	WBGene00004963	WBGene00004932
WBGene00004489	WBGene00007350	WBGene00004969	WBGene00004933
WBGene00004490	WBGene00007351	WBGene00004975	WBGene00004947
WBGene00004491	WBGene00007352	WBGene00004978	WBGene00004949
WBGene00004492	WBGene00007355	WBGene00004979	WBGene00004950
WBGene00004493	WBGene00007363	WBGene00004980	WBGene00004951
WBGene00004494	WBGene00007364	WBGene00004981	WBGene00004952
WBGene00004495	WBGene00007384	WBGene00004985	WBGene00004959
WBGene00004496	WBGene00007387	WBGene00004993	WBGene00004969
WBGene00004497	WBGene00007388	WBGene00004995	WBGene00004975
WBGene00004498	WBGene00007400	WBGene00005006	WBGene00004978
WBGene00004501	WBGene00007404	WBGene00005007	WBGene00004979
WBGene00004502	WBGene00007409	WBGene00005009	WBGene00004980
WBGene00004503	WBGene00007412	WBGene00005013	WBGene00004981
WBGene00004504	WBGene00007413	WBGene00005014	WBGene00004985
WBGene00004505	WBGene00007419	WBGene00005015	WBGene00004995
WBGene00004506	WBGene00007428	WBGene00005016	WBGene00004996
WBGene00004507	WBGene00007429	WBGene00005017	WBGene00005007
WBGene00004679	WBGene00007435	WBGene00005019	WBGene00005010
WBGene00004680	WBGene00007436	WBGene00005020	WBGene00005013
WBGene00004682	WBGene00007438	WBGene00005021	WBGene00005014
WBGene00004700	WBGene00007444	WBGene00005022	WBGene00005015
WBGene00004701	WBGene00007446	WBGene00005023	WBGene00005019
WBGene00004702	WBGene00007463	WBGene00005024	WBGene00005020
WBGene00004703	WBGene00007480	WBGene00005025	WBGene00005021
WBGene00004704	WBGene00007490	WBGene00005026	WBGene00005022
WBGene00004705	WBGene00007500	WBGene00005077	WBGene00005023
WBGene00004706	WBGene00007505	WBGene00005078	WBGene00005024
WBGene00004719	WBGene00007514	WBGene00005642	WBGene00005025
WBGene00004723	WBGene00007516	WBGene00005643	WBGene00005026
WBGene00004727	WBGene00007517	WBGene00005644	WBGene00005077
WBGene00004728	WBGene00007528	WBGene00005647	WBGene00005078
WBGene00004729	WBGene00007531	WBGene00005648	WBGene00005153
WBGene00004732	WBGene00007534	WBGene00005649	WBGene00005226
WBGene00004735	WBGene00007548	WBGene00005662	WBGene00005642
WBGene00004736	WBGene00007549	WBGene00005663	WBGene00005643
WBGene00004737	WBGene00007554	WBGene00006050	WBGene00005647
WBGene00004738	WBGene00007555	WBGene00006051	WBGene00005648
WBGene00004740	WBGene00007556	WBGene00006052	WBGene00005662
WBGene00004743	WBGene00007561	WBGene00006053	WBGene00005663
WBGene00004744	WBGene00007564	WBGene00006055	WBGene00005895
WBGene00004752	WBGene00007576	WBGene00006059	WBGene00006059
WBGene00004753	WBGene00007581	WBGene00006061	WBGene00006061
WBGene00004754	WBGene00007584	WBGene00006062	WBGene00006062
WBGene00004755	WBGene00007591	WBGene00006066	WBGene00006063
WBGene00004756	WBGene00007593	WBGene00006068	WBGene00006064
WBGene00004758	WBGene00007595	WBGene00006307	WBGene00006307
WBGene00004759	WBGene00007606	WBGene00006308	WBGene00006308
WBGene00004760	WBGene00007617	WBGene00006309	WBGene00006309
WBGene00004762	WBGene00007620	WBGene00006310	WBGene00006310
WBGene00004765	WBGene00007621	WBGene00006318	WBGene00006318
WBGene00004766	WBGene00007622	WBGene00006321	WBGene00006321
WBGene00004767	WBGene00007623	WBGene00006324	WBGene00006324
WBGene00004768	WBGene00007626	WBGene00006349	WBGene00006331
WBGene00004769	WBGene00007627	WBGene00006351	WBGene00006349
WBGene00004771	WBGene00007628	WBGene00006352	WBGene00006351
WBGene00004773	WBGene00007630	WBGene00006359	WBGene00006352
WBGene00004774	WBGene00007635	WBGene00006363	WBGene00006359
WBGene00004775	WBGene00007646	WBGene00006364	WBGene00006363
WBGene00004776	WBGene00007664	WBGene00006365	WBGene00006364
WBGene00004777	WBGene00007666	WBGene00006367	WBGene00006365
WBGene00004778	WBGene00007683	WBGene00006368	WBGene00006367
WBGene00004779	WBGene00007686	WBGene00006369	WBGene00006368
WBGene00004780	WBGene00007694	WBGene00006373	WBGene00006369
WBGene00004781	WBGene00007696	WBGene00006382	WBGene00006373
WBGene00004782	WBGene00007703	WBGene00006383	WBGene00006382
WBGene00004786	WBGene00007705	WBGene00006385	WBGene00006383
WBGene00004787	WBGene00007706	WBGene00006386	WBGene00006385
WBGene00004788	WBGene00007707	WBGene00006387	WBGene00006386
WBGene00004789	WBGene00007711	WBGene00006388	WBGene00006387
WBGene00004790	WBGene00007712	WBGene00006389	WBGene00006388
WBGene00004793	WBGene00007718	WBGene00006390	WBGene00006389
WBGene00004795	WBGene00007730	WBGene00006391	WBGene00006390
WBGene00004798	WBGene00007750	WBGene00006393	WBGene00006391
WBGene00004800	WBGene00007753	WBGene00006394	WBGene00006392
WBGene00004801	WBGene00007755	WBGene00006396	WBGene00006393
WBGene00004802	WBGene00007784	WBGene00006397	WBGene00006396
WBGene00004803	WBGene00007787	WBGene00006405	WBGene00006397
WBGene00004806	WBGene00007799	WBGene00006406	WBGene00006402
WBGene00004807	WBGene00007801	WBGene00006410	WBGene00006405
WBGene00004808	WBGene00007808	WBGene00006411	WBGene00006406
WBGene00004809	WBGene00007812	WBGene00006414	WBGene00006407
WBGene00004810	WBGene00007836	WBGene00006415	WBGene00006410
WBGene00004811	WBGene00007846	WBGene00006416	WBGene00006411
WBGene00004812	WBGene00007847	WBGene00006423	WBGene00006412
WBGene00004829	WBGene00007848	WBGene00006424	WBGene00006414
WBGene00004830	WBGene00007857	WBGene00006432	WBGene00006415
WBGene00004831	WBGene00007860	WBGene00006433	WBGene00006416
WBGene00004854	WBGene00007862	WBGene00006434	WBGene00006418
WBGene00004855	WBGene00007878	WBGene00006435	WBGene00006423
WBGene00004856	WBGene00007880	WBGene00006436	WBGene00006424
WBGene00004857	WBGene00007882	WBGene00006437	WBGene00006431
WBGene00004858	WBGene00007886	WBGene00006438	WBGene00006432
WBGene00004859	WBGene00007912	WBGene00006439	WBGene00006433
WBGene00004873	WBGene00007917	WBGene00006442	WBGene00006434
WBGene00004874	WBGene00007918	WBGene00006443	WBGene00006435
WBGene00004875	WBGene00007922	WBGene00006446	WBGene00006437
WBGene00004878	WBGene00007924	WBGene00006447	WBGene00006438
WBGene00004879	WBGene00007927	WBGene00006448	WBGene00006439
WBGene00004880	WBGene00007941	WBGene00006450	WBGene00006442
WBGene00004881	WBGene00007942	WBGene00006460	WBGene00006443
WBGene00004882	WBGene00007952	WBGene00006461	WBGene00006444
WBGene00004884	WBGene00007953	WBGene00006462	WBGene00006446
WBGene00004886	WBGene00007954	WBGene00006463	WBGene00006447
WBGene00004887	WBGene00007956	WBGene00006465	WBGene00006448
WBGene00004888	WBGene00007959	WBGene00006466	WBGene00006452
WBGene00004889	WBGene00007963	WBGene00006467	WBGene00006461
WBGene00004890	WBGene00007964	WBGene00006468	WBGene00006463
WBGene00004891	WBGene00007967	WBGene00006470	WBGene00006465
WBGene00004892	WBGene00007969	WBGene00006472	WBGene00006467
WBGene00004893	WBGene00007971	WBGene00006473	WBGene00006468
WBGene00004894	WBGene00007972	WBGene00006474	WBGene00006470
WBGene00004895	WBGene00007974	WBGene00006476	WBGene00006472
WBGene00004896	WBGene00007980	WBGene00006477	WBGene00006473
WBGene00004897	WBGene00007982	WBGene00006478	WBGene00006474
WBGene00004898	WBGene00007983	WBGene00006479	WBGene00006475
WBGene00004905	WBGene00007988	WBGene00006481	WBGene00006476
WBGene00004910	WBGene00007993	WBGene00006483	WBGene00006477
WBGene00004912	WBGene00008000	WBGene00006489	WBGene00006478
WBGene00004913	WBGene00008006	WBGene00006490	WBGene00006479
WBGene00004914	WBGene00008018	WBGene00006491	WBGene00006481
WBGene00004915	WBGene00008019	WBGene00006493	WBGene00006483
WBGene00004916	WBGene00008027	WBGene00006494	WBGene00006487
WBGene00004917	WBGene00008028	WBGene00006497	WBGene00006489
WBGene00004918	WBGene00008029	WBGene00006498	WBGene00006490
WBGene00004919	WBGene00008030	WBGene00006503	WBGene00006491
WBGene00004920	WBGene00008033	WBGene00006508	WBGene00006493
WBGene00004921	WBGene00008041	WBGene00006510	WBGene00006494
WBGene00004923	WBGene00008052	WBGene00006512	WBGene00006496
WBGene00004924	WBGene00008053	WBGene00006513	WBGene00006497
WBGene00004926	WBGene00008078	WBGene00006514	WBGene00006498
WBGene00004927	WBGene00008093	WBGene00006515	WBGene00006503
WBGene00004929	WBGene00008117	WBGene00006516	WBGene00006504
WBGene00004930	WBGene00008119	WBGene00006518	WBGene00006505
WBGene00004931	WBGene00008121	WBGene00006519	WBGene00006508
WBGene00004932	WBGene00008122	WBGene00006520	WBGene00006510
WBGene00004933	WBGene00008123	WBGene00006524	WBGene00006512
WBGene00004947	WBGene00008131	WBGene00006525	WBGene00006513
WBGene00004950	WBGene00008132	WBGene00006526	WBGene00006514
WBGene00004951	WBGene00008133	WBGene00006527	WBGene00006515
WBGene00004952	WBGene00008136	WBGene00006538	WBGene00006516
WBGene00004958	WBGene00008137	WBGene00006540	WBGene00006517
WBGene00004959	WBGene00008143	WBGene00006541	WBGene00006518
WBGene00004969	WBGene00008151	WBGene00006542	WBGene00006519
WBGene00004975	WBGene00008164	WBGene00006543	WBGene00006520
WBGene00004979	WBGene00008165	WBGene00006556	WBGene00006524
WBGene00004980	WBGene00008167	WBGene00006557	WBGene00006525
WBGene00004981	WBGene00008185	WBGene00006562	WBGene00006526
WBGene00004984	WBGene00008186	WBGene00006563	WBGene00006527
WBGene00004985	WBGene00008205	WBGene00006565	WBGene00006528
WBGene00005007	WBGene00008218	WBGene00006566	WBGene00006529
WBGene00005010	WBGene00008225	WBGene00006567	WBGene00006530
WBGene00005013	WBGene00008236	WBGene00006568	WBGene00006531
WBGene00005014	WBGene00008237	WBGene00006571	WBGene00006532
WBGene00005015	WBGene00008238	WBGene00006572	WBGene00006533
WBGene00005019	WBGene00008239	WBGene00006573	WBGene00006534
WBGene00005020	WBGene00008258	WBGene00006574	WBGene00006535
WBGene00005021	WBGene00008263	WBGene00006575	WBGene00006536
WBGene00005022	WBGene00008273	WBGene00006578	WBGene00006537
WBGene00005023	WBGene00008274	WBGene00006579	WBGene00006538
WBGene00005024	WBGene00008278	WBGene00006580	WBGene00006540
WBGene00005025	WBGene00008288	WBGene00006584	WBGene00006541
WBGene00005026	WBGene00008311	WBGene00006585	WBGene00006542
WBGene00005077	WBGene00008316	WBGene00006586	WBGene00006543
WBGene00005078	WBGene00008320	WBGene00006590	WBGene00006562
WBGene00005642	WBGene00008331	WBGene00006594	WBGene00006563
WBGene00005643	WBGene00008338	WBGene00006595	WBGene00006565
WBGene00005644	WBGene00008339	WBGene00006596	WBGene00006566
WBGene00005647	WBGene00008345	WBGene00006598	WBGene00006567
WBGene00005648	WBGene00008354	WBGene00006599	WBGene00006568
WBGene00005649	WBGene00008362	WBGene00006601	WBGene00006571
WBGene00005662	WBGene00008364	WBGene00006606	WBGene00006572
WBGene00005663	WBGene00008366	WBGene00006607	WBGene00006573
WBGene00006050	WBGene00008370	WBGene00006612	WBGene00006574
WBGene00006051	WBGene00008371	WBGene00006613	WBGene00006575
WBGene00006052	WBGene00008379	WBGene00006615	WBGene00006577
WBGene00006053	WBGene00008380	WBGene00006616	WBGene00006578
WBGene00006059	WBGene00008386	WBGene00006617	WBGene00006579
WBGene00006061	WBGene00008398	WBGene00006619	WBGene00006584
WBGene00006062	WBGene00008400	WBGene00006620	WBGene00006585
WBGene00006063	WBGene00008402	WBGene00006626	WBGene00006586
WBGene00006064	WBGene00008405	WBGene00006633	WBGene00006587
WBGene00006065	WBGene00008408	WBGene00006634	WBGene00006588
WBGene00006066	WBGene00008410	WBGene00006638	WBGene00006589
WBGene00006067	WBGene00008411	WBGene00006647	WBGene00006590
WBGene00006068	WBGene00008414	WBGene00006648	WBGene00006594
WBGene00006307	WBGene00008415	WBGene00006652	WBGene00006595
WBGene00006308	WBGene00008422	WBGene00006654	WBGene00006596
WBGene00006309	WBGene00008425	WBGene00006655	WBGene00006597
WBGene00006318	WBGene00008430	WBGene00006662	WBGene00006598
WBGene00006321	WBGene00008431	WBGene00006669	WBGene00006599
WBGene00006324	WBGene00008439	WBGene00006671	WBGene00006600
WBGene00006331	WBGene00008443	WBGene00006690	WBGene00006601
WBGene00006349	WBGene00008452	WBGene00006696	WBGene00006605
WBGene00006351	WBGene00008455	WBGene00006697	WBGene00006606
WBGene00006352	WBGene00008456	WBGene00006698	WBGene00006607
WBGene00006359	WBGene00008480	WBGene00006699	WBGene00006608
WBGene00006363	WBGene00008502	WBGene00006700	WBGene00006609
WBGene00006364	WBGene00008504	WBGene00006701	WBGene00006611
WBGene00006365	WBGene00008505	WBGene00006702	WBGene00006612
WBGene00006367	WBGene00008510	WBGene00006703	WBGene00006613
WBGene00006368	WBGene00008514	WBGene00006704	WBGene00006614
WBGene00006369	WBGene00008516	WBGene00006705	WBGene00006615
WBGene00006373	WBGene00008519	WBGene00006706	WBGene00006617
WBGene00006375	WBGene00008531	WBGene00006707	WBGene00006619
WBGene00006380	WBGene00008532	WBGene00006708	WBGene00006620
WBGene00006382	WBGene00008538	WBGene00006709	WBGene00006626
WBGene00006383	WBGene00008546	WBGene00006711	WBGene00006633
WBGene00006384	WBGene00008564	WBGene00006713	WBGene00006634
WBGene00006385	WBGene00008565	WBGene00006714	WBGene00006635
WBGene00006386	WBGene00008566	WBGene00006715	WBGene00006637
WBGene00006387	WBGene00008567	WBGene00006720	WBGene00006638
WBGene00006388	WBGene00008570	WBGene00006721	WBGene00006647
WBGene00006389	WBGene00008571	WBGene00006722	WBGene00006648
WBGene00006390	WBGene00008585	WBGene00006723	WBGene00006649
WBGene00006391	WBGene00008586	WBGene00006724	WBGene00006652
WBGene00006392	WBGene00008598	WBGene00006725	WBGene00006654
WBGene00006393	WBGene00008606	WBGene00006726	WBGene00006655
WBGene00006394	WBGene00008621	WBGene00006727	WBGene00006669
WBGene00006395	WBGene00008624	WBGene00006728	WBGene00006680
WBGene00006396	WBGene00008625	WBGene00006729	WBGene00006696
WBGene00006397	WBGene00008639	WBGene00006730	WBGene00006697
WBGene00006402	WBGene00008641	WBGene00006733	WBGene00006698
WBGene00006405	WBGene00008642	WBGene00006734	WBGene00006699
WBGene00006406	WBGene00008643	WBGene00006735	WBGene00006700
WBGene00006407	WBGene00008645	WBGene00006738	WBGene00006701
WBGene00006410	WBGene00008646	WBGene00006742	WBGene00006702
WBGene00006411	WBGene00008654	WBGene00006743	WBGene00006703
WBGene00006412	WBGene00008664	WBGene00006744	WBGene00006704
WBGene00006414	WBGene00008666	WBGene00006745	WBGene00006705
WBGene00006415	WBGene00008670	WBGene00006746	WBGene00006706
WBGene00006416	WBGene00008678	WBGene00006748	WBGene00006707
WBGene00006418	WBGene00008681	WBGene00006750	WBGene00006708
WBGene00006423	WBGene00008682	WBGene00006751	WBGene00006709
WBGene00006424	WBGene00008683	WBGene00006752	WBGene00006711
WBGene00006432	WBGene00008684	WBGene00006754	WBGene00006712
WBGene00006433	WBGene00008685	WBGene00006755	WBGene00006713
WBGene00006434	WBGene00008686	WBGene00006756	WBGene00006714
WBGene00006436	WBGene00008687	WBGene00006757	WBGene00006715
WBGene00006437	WBGene00008688	WBGene00006761	WBGene00006716
WBGene00006439	WBGene00008693	WBGene00006762	WBGene00006718
WBGene00006442	WBGene00008694	WBGene00006763	WBGene00006720
WBGene00006443	WBGene00008706	WBGene00006764	WBGene00006721
WBGene00006444	WBGene00008711	WBGene00006766	WBGene00006722
WBGene00006446	WBGene00008729	WBGene00006767	WBGene00006723
WBGene00006447	WBGene00008733	WBGene00006768	WBGene00006724
[truncated: 4,405 more rows]

## Sheet: B) Results Distribution
Ensembl Uniques (859)	HoGe Uniques (67)	InP Uniques (476)	OrthoMCL Uniques (248)		Ensembl/HoGe (100)	Ensembl/InP (250)	Ensembl/OrthoMCL (422)	HoGe/InP (48)	HoGe/OrthoMCL (50)	InP/OrthoMCL (139)		Ensembl/HoGe/InP (106)	Ensembl/HoGe/OrthoMCL (232)	Ensembl/InP/OrthoMCL (1048)	HoGe/InP/OrthoMCL (137)		All Programs (3387)
WBGene00000037	WBGene00001750	WBGene00000120	WBGene00000073		WBGene00000169	WBGene00000139	WBGene00000023	WBGene00000241	WBGene00000105	WBGene00000121		WBGene00000058	WBGene00000003	WBGene00000018	WBGene00000071		WBGene00000001
WBGene00000038	WBGene00001751	WBGene00000178	WBGene00000216		WBGene00000173	WBGene00000145	WBGene00000036	WBGene00000977	WBGene00000296	WBGene00000122		WBGene00000279	WBGene00000067	WBGene00000096	WBGene00000106		WBGene00000002
WBGene00000042	WBGene00001754	WBGene00000223	WBGene00000606		WBGene00000190	WBGene00000441	WBGene00000055	WBGene00000978	WBGene00000396	WBGene00000177		WBGene00000424	WBGene00000069	WBGene00000143	WBGene00000180		WBGene00000004
WBGene00000043	WBGene00001755	WBGene00000251	WBGene00000777		WBGene00000373	WBGene00000448	WBGene00000093	WBGene00000986	WBGene00000991	WBGene00000265		WBGene00000583	WBGene00000090	WBGene00000200	WBGene00000269		WBGene00000020
WBGene00000044	WBGene00001757	WBGene00000252	WBGene00000780		WBGene00000551	WBGene00000449	WBGene00000176	WBGene00001425	WBGene00001487	WBGene00000274		WBGene00000950	WBGene00000118	WBGene00000205	WBGene00000289		WBGene00000022
WBGene00000046	WBGene00001760	WBGene00000256	WBGene00000992		WBGene00000674	WBGene00000473	WBGene00000202	WBGene00002244	WBGene00001614	WBGene00000414		WBGene00000952	WBGene00000150	WBGene00000206	WBGene00000382		WBGene00000035
WBGene00000048	WBGene00001761	WBGene00000399	WBGene00001068		WBGene00000905	WBGene00000475	WBGene00000226	WBGene00006774	WBGene00001615	WBGene00000534		WBGene00000972	WBGene00000163	WBGene00000207	WBGene00000415		WBGene00000039
WBGene00000049	WBGene00001762	WBGene00000517	WBGene00001145		WBGene00001247	WBGene00000483	WBGene00000249	WBGene00006894	WBGene00001616	WBGene00000535		WBGene00000989	WBGene00000204	WBGene00000209	WBGene00000454		WBGene00000040
WBGene00000050	WBGene00001763	WBGene00000594	WBGene00001214		WBGene00001429	WBGene00000521	WBGene00000259	WBGene00006896	WBGene00001678	WBGene00000584		WBGene00001053	WBGene00000211	WBGene00000210	WBGene00000463		WBGene00000041
WBGene00000053	WBGene00001765	WBGene00000596	WBGene00001223		WBGene00001595	WBGene00000527	WBGene00000262	WBGene00007245	WBGene00001752	WBGene00000708		WBGene00001081	WBGene00000213	WBGene00000222	WBGene00000478		WBGene00000060
WBGene00000054	WBGene00001766	WBGene00000597	WBGene00001239		WBGene00001598	WBGene00000537	WBGene00000282	WBGene00007363	WBGene00001753	WBGene00000792		WBGene00001166	WBGene00000227	WBGene00000231	WBGene00000503		WBGene00000063
WBGene00000056	WBGene00001767	WBGene00000599	WBGene00001240		WBGene00001599	WBGene00000564	WBGene00000386	WBGene00007364	WBGene00001756	WBGene00000795		WBGene00001557	WBGene00000232	WBGene00000236	WBGene00000552		WBGene00000064
WBGene00000057	WBGene00001768	WBGene00000601	WBGene00001245		WBGene00001600	WBGene00000819	WBGene00000411	WBGene00007436	WBGene00001764	WBGene00000835		WBGene00001640	WBGene00000233	WBGene00000246	WBGene00000872		WBGene00000065
WBGene00000059	WBGene00001770	WBGene00000602	WBGene00001400		WBGene00001601	WBGene00000829	WBGene00000421	WBGene00008027	WBGene00001769	WBGene00000863		WBGene00001758	WBGene00000248	WBGene00000270	WBGene00000877		WBGene00000066
WBGene00000061	WBGene00001772	WBGene00000603	WBGene00001466		WBGene00001789	WBGene00001043	WBGene00000429	WBGene00008028	WBGene00001776	WBGene00000929		WBGene00001773	WBGene00000254	WBGene00000277	WBGene00000878		WBGene00000068
WBGene00000062	WBGene00001774	WBGene00000608	WBGene00001488		WBGene00002265	WBGene00001162	WBGene00000430	WBGene00008029	WBGene00001777	WBGene00000961		WBGene00002242	WBGene00000281	WBGene00000301	WBGene00000879		WBGene00000072
WBGene00000070	WBGene00001775	WBGene00000611	WBGene00001491		WBGene00003518	WBGene00001182	WBGene00000433	WBGene00008030	WBGene00001780	WBGene00001483		WBGene00002259	WBGene00000406	WBGene00000367	WBGene00000883		WBGene00000074
WBGene00000098	WBGene00001778	WBGene00000612	WBGene00001538		WBGene00003562	WBGene00001432	WBGene00000453	WBGene00008516	WBGene00001786	WBGene00001492		WBGene00002260	WBGene00000485	WBGene00000371	WBGene00000889		WBGene00000075
WBGene00000100	WBGene00001779	WBGene00000614	WBGene00001551		WBGene00003588	WBGene00001440	WBGene00000458	WBGene00008625	WBGene00001787	WBGene00001609		WBGene00002266	WBGene00000531	WBGene00000387	WBGene00000891		WBGene00000080
WBGene00000144	WBGene00001781	WBGene00000615	WBGene00001553		WBGene00003807	WBGene00001481	WBGene00000468	WBGene00008678	WBGene00001795	WBGene00001681		WBGene00002267	WBGene00000544	WBGene00000388	WBGene00000897		WBGene00000081
WBGene00000146	WBGene00001782	WBGene00000616	WBGene00001578		WBGene00003808	WBGene00001653	WBGene00000469	WBGene00009153	WBGene00001796	WBGene00001759		WBGene00002268	WBGene00000994	WBGene00000391	WBGene00000898		WBGene00000086
WBGene00000156	WBGene00001783	WBGene00000617	WBGene00001666		WBGene00003941	WBGene00001954	WBGene00000472	WBGene00009890	WBGene00001946	WBGene00001862		WBGene00002981	WBGene00001116	WBGene00000392	WBGene00000985		WBGene00000089
WBGene00000196	WBGene00001784	WBGene00000618	WBGene00001669		WBGene00004135	WBGene00002011	WBGene00000474	WBGene00009891	WBGene00002198	WBGene00001950		WBGene00003168	WBGene00001242	WBGene00000397	WBGene00001050		WBGene00000092
WBGene00000214	WBGene00001785	WBGene00000620	WBGene00001958		WBGene00006486	WBGene00002012	WBGene00000528	WBGene00009895	WBGene00002218	WBGene00001995		WBGene00003174	WBGene00001332	WBGene00000413	WBGene00001137		WBGene00000095
WBGene00000215	WBGene00002199	WBGene00000622	WBGene00001980		WBGene00006657	WBGene00002013	WBGene00000529	WBGene00009896	WBGene00003369	WBGene00002180		WBGene00003573	WBGene00001334	WBGene00000420	WBGene00001168		WBGene00000097
WBGene00000218	WBGene00002200	WBGene00000625	WBGene00001996		WBGene00006658	WBGene00002023	WBGene00000771	WBGene00010857	WBGene00003370	WBGene00002979		WBGene00003574	WBGene00001428	WBGene00000428	WBGene00001169		WBGene00000099
WBGene00000219	WBGene00002205	WBGene00000626	WBGene00002026		WBGene00006663	WBGene00002053	WBGene00000772	WBGene00011724	WBGene00004212	WBGene00003001		WBGene00003575	WBGene00001430	WBGene00000431	WBGene00001184		WBGene00000101
WBGene00000220	WBGene00002211	WBGene00000627	WBGene00003072		WBGene00006665	WBGene00002054	WBGene00000782	WBGene00011966	WBGene00006504	WBGene00003482		WBGene00003835	WBGene00001479	WBGene00000438	WBGene00001329		WBGene00000102
WBGene00000238	WBGene00002282	WBGene00000631	WBGene00003144		WBGene00006668	WBGene00002069	WBGene00000784	WBGene00012693	WBGene00006528	WBGene00003597		WBGene00003986	WBGene00001513	WBGene00000439	WBGene00001520		WBGene00000103
WBGene00000250	WBGene00003371	WBGene00000634	WBGene00003222		WBGene00006672	WBGene00002225	WBGene00000803	WBGene00014200	WBGene00006529	WBGene00003623		WBGene00004382	WBGene00001559	WBGene00000445	WBGene00001604		WBGene00000107
WBGene00000267	WBGene00003862	WBGene00000636	WBGene00003497		WBGene00006675	WBGene00002226	WBGene00000839	WBGene00015162	WBGene00006530	WBGene00003797		WBGene00004768	WBGene00001591	WBGene00000447	WBGene00001651		WBGene00000108
WBGene00000275	WBGene00003863	WBGene00000637	WBGene00003532		WBGene00006677	WBGene00002269	WBGene00000841	WBGene00015246	WBGene00006531	WBGene00004196		WBGene00006394	WBGene00001592	WBGene00000493	WBGene00001748		WBGene00000109
WBGene00000389	WBGene00004699	WBGene00000638	WBGene00003559		WBGene00006682	WBGene00002270	WBGene00000868	WBGene00015437	WBGene00006533	WBGene00004245		WBGene00006460	WBGene00001593	WBGene00000507	WBGene00001945		WBGene00000110
WBGene00000412	WBGene00006366	WBGene00000639	WBGene00003568		WBGene00006683	WBGene00002271	WBGene00000885	WBGene00017179	WBGene00006535	WBGene00004395		WBGene00006662	WBGene00001623	WBGene00000520	WBGene00001972		WBGene00000111
WBGene00000425	WBGene00006656	WBGene00000640	WBGene00003777		WBGene00006684	WBGene00002272	WBGene00000900	WBGene00017183	WBGene00006888	WBGene00004749		WBGene00006671	WBGene00001647	WBGene00000770	WBGene00002232		WBGene00000112
WBGene00000432	WBGene00006678	WBGene00000641	WBGene00003795		WBGene00006691	WBGene00002273	WBGene00000913	WBGene00018002	WBGene00008510	WBGene00004949		WBGene00006748	WBGene00001829	WBGene00000785	WBGene00002239		WBGene00000113
WBGene00000436	WBGene00006886	WBGene00000644	WBGene00003850		WBGene00006692	WBGene00002275	WBGene00000935	WBGene00018853	WBGene00008711	WBGene00004995		WBGene00006779	WBGene00001830	WBGene00000786	WBGene00002248		WBGene00000114
WBGene00000440	WBGene00006897	WBGene00000645	WBGene00003989		WBGene00006864	WBGene00002915	WBGene00000968	WBGene00019178	WBGene00009678	WBGene00006562		WBGene00006792	WBGene00001836	WBGene00000813	WBGene00002344		WBGene00000115
WBGene00000446	WBGene00007846	WBGene00000647	WBGene00003991		WBGene00007080	WBGene00002976	WBGene00001061	WBGene00019179	WBGene00009958	WBGene00006754		WBGene00006832	WBGene00003171	WBGene00000815	WBGene00002891		WBGene00000116
WBGene00000450	WBGene00007847	WBGene00000649	WBGene00003997		WBGene00007204	WBGene00003002	WBGene00001086	WBGene00019364	WBGene00011193	WBGene00006777		WBGene00007203	WBGene00003376	WBGene00000816	WBGene00002990		WBGene00000117
WBGene00000457	WBGene00007880	WBGene00000650	WBGene00003998		WBGene00007584	WBGene00003124	WBGene00001088	WBGene00019885	WBGene00011972	WBGene00006881		WBGene00007347	WBGene00003409	WBGene00000865	WBGene00003060		WBGene00000123
WBGene00000461	WBGene00008093	WBGene00000651	WBGene00003999		WBGene00007635	WBGene00003224	WBGene00001101	WBGene00019886	WBGene00012768	WBGene00006976		WBGene00007384	WBGene00003410	WBGene00000866	WBGene00003066		WBGene00000137
WBGene00000477	WBGene00008681	WBGene00000653	WBGene00004000		WBGene00007988	WBGene00003242	WBGene00001156	WBGene00021003	WBGene00013711	WBGene00007015		WBGene00007404	WBGene00003412	WBGene00000867	WBGene00003102		WBGene00000140
WBGene00000487	WBGene00008746	WBGene00000654	WBGene00004001		WBGene00008137	WBGene00003480	WBGene00001178	WBGene00021780	WBGene00014028	WBGene00007060		WBGene00007808	WBGene00003566	WBGene00000870	WBGene00003142		WBGene00000142
WBGene00000509	WBGene00008897	WBGene00000655	WBGene00004002		WBGene00008185	WBGene00003509	WBGene00001249	WBGene00022207	WBGene00017464	WBGene00007268		WBGene00007862	WBGene00003570	WBGene00000894	WBGene00003196		WBGene00000147
WBGene00000511	WBGene00009455	WBGene00000656	WBGene00004004		WBGene00008186	WBGene00003526	WBGene00001439	WBGene00022377	WBGene00018513	WBGene00007513		WBGene00007954	WBGene00003571	WBGene00000895	WBGene00003233		WBGene00000148
WBGene00000512	WBGene00011168	WBGene00000657	WBGene00004005		WBGene00008278	WBGene00003527	WBGene00001484	WBGene00022787	WBGene00019289	WBGene00007631		WBGene00008123	WBGene00003657	WBGene00000911	WBGene00003372		WBGene00000149
WBGene00000513	WBGene00011169	WBGene00000659	WBGene00004006		WBGene00008821	WBGene00003675	WBGene00001486	WBGene00044811	WBGene00020931	WBGene00007697		WBGene00008519	WBGene00003659	WBGene00000912	WBGene00003396		WBGene00000155
WBGene00000514	WBGene00011291	WBGene00000660	WBGene00004007		WBGene00008910	WBGene00003779	WBGene00001493		WBGene00021022	WBGene00008375		WBGene00008598	WBGene00003730	WBGene00000938	WBGene00003397		WBGene00000157
WBGene00000548	WBGene00011339	WBGene00000661	WBGene00004008		WBGene00009513	WBGene00003801	WBGene00001568		WBGene00022434	WBGene00008459		WBGene00008808	WBGene00003734	WBGene00000941	WBGene00003406		WBGene00000158
WBGene00000562	WBGene00012206	WBGene00000663	WBGene00004017		WBGene00010663	WBGene00003838	WBGene00001574			WBGene00008768		WBGene00009221	WBGene00003828	WBGene00000942	WBGene00003479		WBGene00000159
WBGene00000563	WBGene00012207	WBGene00000664	WBGene00004083		WBGene00010705	WBGene00003839	WBGene00001596			WBGene00008780		WBGene00009316	WBGene00003878	WBGene00000958	WBGene00003772		WBGene00000160
WBGene00000781	WBGene00012270	WBGene00000665	WBGene00004114		WBGene00010706	WBGene00003840	WBGene00001622			WBGene00008996		WBGene00009485	WBGene00003956	WBGene00001002	WBGene00003776		WBGene00000161
WBGene00000783	WBGene00012664	WBGene00000666	WBGene00004244		WBGene00010707	WBGene00003841	WBGene00001624			WBGene00009236		WBGene00009735	WBGene00004209	WBGene00001008	WBGene00003844		WBGene00000162
WBGene00000789	WBGene00012816	WBGene00000667	WBGene00004309		WBGene00011009	WBGene00003851	WBGene00001630			WBGene00009505		WBGene00010510	WBGene00004211	WBGene00001033	WBGene00003902		WBGene00000164
WBGene00000820	WBGene00013700	WBGene00000668	WBGene00004508		WBGene00011094	WBGene00003915	WBGene00001812			WBGene00009556		WBGene00010606	WBGene00004269	WBGene00001080	WBGene00003903		WBGene00000165
WBGene00000821	WBGene00016160	WBGene00000669	WBGene00004509		WBGene00012116	WBGene00004029	WBGene00001817			WBGene00009636		WBGene00010762	WBGene00004313	WBGene00001161	WBGene00003995		WBGene00000166
WBGene00000899	WBGene00016354	WBGene00000670	WBGene00004510		WBGene00012137	WBGene00004143	WBGene00001818			WBGene00009739		WBGene00010803	WBGene00004316	WBGene00001167	WBGene00004003		WBGene00000170
WBGene00000902	WBGene00017157	WBGene00000671	WBGene00004922		WBGene00012168	WBGene00004778	WBGene00001851			WBGene00009881		WBGene00011235	WBGene00004350	WBGene00001194	WBGene00004284		WBGene00000171
WBGene00000904	WBGene00019248	WBGene00000675	WBGene00004996		WBGene00012259	WBGene00004858	WBGene00001943			WBGene00009940		WBGene00011258	WBGene00004359	WBGene00001204	WBGene00004392		WBGene00000172
WBGene00000910	WBGene00020659	WBGene00000676	WBGene00005153		WBGene00012275	WBGene00005644	WBGene00001961			WBGene00010062		WBGene00011416	WBGene00004360	WBGene00001207	WBGene00004499		WBGene00000174
WBGene00000951	WBGene00020681	WBGene00000678	WBGene00005226		WBGene00012402	WBGene00005649	WBGene00002015			WBGene00010306		WBGene00011419	WBGene00004490	WBGene00001235	WBGene00004698		WBGene00000175
WBGene00000955	WBGene00021110	WBGene00000679	WBGene00005895		WBGene00012489	WBGene00006050	WBGene00002016			WBGene00010403		WBGene00011673	WBGene00004497	WBGene00001281	WBGene00004742		WBGene00000181
WBGene00000965	WBGene00021745	WBGene00000680	WBGene00006431		WBGene00013520	WBGene00006051	WBGene00002017			WBGene00010439		WBGene00011676	WBGene00004776	WBGene00001330	WBGene00004860		WBGene00000182
WBGene00000969	WBGene00022467	WBGene00000681	WBGene00006452		WBGene00013883	WBGene00006052	WBGene00002021			WBGene00010458		WBGene00011868	WBGene00004779	WBGene00001365	WBGene00004876		WBGene00000183
WBGene00000980	WBGene00022789	WBGene00000682	WBGene00006532		WBGene00014102	WBGene00006053	WBGene00002030			WBGene00010904		WBGene00011926	WBGene00004780	WBGene00001371	WBGene00004877		WBGene00000184
WBGene00001022	WBGene00044903	WBGene00000685	WBGene00006534		WBGene00014103	WBGene00006066	WBGene00002149			WBGene00010922		WBGene00012162	WBGene00004905	WBGene00001395	WBGene00004978		WBGene00000187
WBGene00001023		WBGene00000687	WBGene00006605		WBGene00014989	WBGene00006068	WBGene00002299			WBGene00010993		WBGene00012315	WBGene00005010	WBGene00001396	WBGene00006310		WBGene00000188
WBGene00001034		WBGene00000690	WBGene00006637		WBGene00015628	WBGene00006436	WBGene00002999			WBGene00011269		WBGene00012967	WBGene00006064	WBGene00001403	WBGene00006435		WBGene00000189
WBGene00001057		WBGene00000691	WBGene00006649		WBGene00015889	WBGene00006450	WBGene00003008			WBGene00011340		WBGene00013587	WBGene00006402	WBGene00001406	WBGene00006438		WBGene00000192
WBGene00001059		WBGene00000692	WBGene00006873		WBGene00016110	WBGene00006462	WBGene00003018			WBGene00011528		WBGene00013835	WBGene00006407	WBGene00001410	WBGene00006463		WBGene00000193
WBGene00001096		WBGene00000693	WBGene00007068		WBGene00016350	WBGene00006466	WBGene00003040			WBGene00011630		WBGene00013926	WBGene00006412	WBGene00001427	WBGene00006498		WBGene00000195
WBGene00001102		WBGene00000694	WBGene00007228		WBGene00016664	WBGene00006778	WBGene00003107			WBGene00011705		WBGene00015592	WBGene00006418	WBGene00001434	WBGene00006541		WBGene00000197
WBGene00001133		WBGene00000696	WBGene00007248		WBGene00017944	WBGene00006845	WBGene00003133			WBGene00012198		WBGene00015676	WBGene00006444	WBGene00001489	WBGene00006619		WBGene00000198
WBGene00001157		WBGene00000697	WBGene00007254		WBGene00017950	WBGene00006874	WBGene00003151			WBGene00012483		WBGene00016092	WBGene00006505	WBGene00001494	WBGene00006620		WBGene00000199
WBGene00001158		WBGene00000698	WBGene00007282		WBGene00018885	WBGene00006938	WBGene00003163			WBGene00012807		WBGene00016174	WBGene00006517	WBGene00001496	WBGene00006727		WBGene00000201
WBGene00001190		WBGene00000699	WBGene00007284		WBGene00018911	WBGene00007062	WBGene00003178			WBGene00012908		WBGene00016489	WBGene00006536	WBGene00001505	WBGene00006791		WBGene00000203
WBGene00001210		WBGene00000701	WBGene00007385		WBGene00018912	WBGene00007089	WBGene00003229			WBGene00012925		WBGene00017532	WBGene00006537	WBGene00001516	WBGene00006797		WBGene00000208
WBGene00001237		WBGene00000703	WBGene00007398		WBGene00018963	WBGene00007261	WBGene00003235			WBGene00012977		WBGene00017945	WBGene00006577	WBGene00001626	WBGene00007215		WBGene00000212
WBGene00001345		WBGene00000704	WBGene00007448		WBGene00019438	WBGene00007357	WBGene00003239			WBGene00013004		WBGene00017971	WBGene00006597	WBGene00001643	WBGene00007339		WBGene00000217
WBGene00001401		WBGene00000705	WBGene00007493		WBGene00019692	WBGene00007565	WBGene00003384			WBGene00013041		WBGene00018283	WBGene00006600	WBGene00001644	WBGene00007516		WBGene00000224
WBGene00001402		WBGene00000706	WBGene00007533		WBGene00020046	WBGene00007776	WBGene00003413			WBGene00013150		WBGene00018317	WBGene00006614	WBGene00001682	WBGene00007517		WBGene00000225
WBGene00001433		WBGene00000707	WBGene00007545		WBGene00020506	WBGene00007877	WBGene00003414			WBGene00013422		WBGene00018402	WBGene00006635	WBGene00001707	WBGene00007750		WBGene00000228
WBGene00001465		WBGene00000710	WBGene00007684		WBGene00020559	WBGene00007914	WBGene00003495			WBGene00015008		WBGene00018656	WBGene00006680	WBGene00001743	WBGene00007848		WBGene00000229
WBGene00001490		WBGene00000711	WBGene00007710		WBGene00020689	WBGene00007944	WBGene00003511			WBGene00015025		WBGene00018901	WBGene00006716	WBGene00001792	WBGene00008000		WBGene00000230
WBGene00001511		WBGene00000713	WBGene00007760		WBGene00020914	WBGene00007994	WBGene00003578			WBGene00015035		WBGene00019108	WBGene00006759	WBGene00001814	WBGene00008624		WBGene00000235
WBGene00001560		WBGene00000714	WBGene00007849		WBGene00020936	WBGene00008166	WBGene00003639			WBGene00015062		WBGene00019109	WBGene00006760	WBGene00001819	WBGene00008805		WBGene00000240
WBGene00001586		WBGene00000715	WBGene00007859		WBGene00021121	WBGene00008396	WBGene00003729			WBGene00015327		WBGene00019609	WBGene00006770	WBGene00001833	WBGene00008832		WBGene00000242
WBGene00001587		WBGene00000716	WBGene00008230		WBGene00021368	WBGene00008404	WBGene00003793			WBGene00015479		WBGene00019979	WBGene00006801	WBGene00001837	WBGene00008950		WBGene00000244
WBGene00001594		WBGene00000717	WBGene00008314		WBGene00021537	WBGene00008407	WBGene00003802			WBGene00015513		WBGene00020168	WBGene00006804	WBGene00001865	WBGene00009450		WBGene00000247
WBGene00001602		WBGene00000718	WBGene00008444		WBGene00021566	WBGene00008593	WBGene00003805			WBGene00015693		WBGene00020258	WBGene00006924	WBGene00001875	WBGene00009892		WBGene00000253
WBGene00001618		WBGene00000719	WBGene00008669		WBGene00021797	WBGene00008594	WBGene00003909			WBGene00015776		WBGene00020295	WBGene00006961	WBGene00001879	WBGene00010370		WBGene00000257
WBGene00001621		WBGene00000720	WBGene00008934		WBGene00021983	WBGene00008595	WBGene00003912			WBGene00016002		WBGene00021213	WBGene00007138	WBGene00001884	WBGene00010488		WBGene00000266
WBGene00001625		WBGene00000721	WBGene00008980		WBGene00022223	WBGene00008596	WBGene00003937			WBGene00016057		WBGene00021215	WBGene00007202	WBGene00001888	WBGene00010785		WBGene00000271
WBGene00001633		WBGene00000722	WBGene00009106		WBGene00022235	WBGene00008597	WBGene00003939			WBGene00016074		WBGene00021555	WBGene00007351	WBGene00001892	WBGene00010856		WBGene00000276
WBGene00001637		WBGene00000723	WBGene00009219		WBGene00022499	WBGene00008793	WBGene00003943			WBGene00016118		WBGene00021661	WBGene00007480	WBGene00001900	WBGene00010858		WBGene00000280
WBGene00001726		WBGene00000724	WBGene00009257		WBGene00022780	WBGene00008990	WBGene00003957			WBGene00016790		WBGene00021818	WBGene00007490	WBGene00001902	WBGene00011935		WBGene00000283
WBGene00001732		WBGene00000725	WBGene00009364		WBGene00044121	WBGene00009337	WBGene00003958			WBGene00016849		WBGene00021948	WBGene00007591	WBGene00001905	WBGene00012225		WBGene00000292
WBGene00001824		WBGene00000726	WBGene00009576		WBGene00044631	WBGene00009579	WBGene00003959			WBGene00016937		WBGene00022129	WBGene00007711	WBGene00001911	WBGene00012316		WBGene00000293
WBGene00001852		WBGene00000727	WBGene00009673		WBGene00044794	WBGene00009852	WBGene00003982			WBGene00017013		WBGene00022372	WBGene00007784	WBGene00001912	WBGene00012722		WBGene00000294
WBGene00001869		WBGene00000728	WBGene00009691			WBGene00010012	WBGene00003996			WBGene00017071		WBGene00022646	WBGene00007956	WBGene00001920	WBGene00012896		WBGene00000295
WBGene00001913		WBGene00000729	WBGene00009692			WBGene00010093	WBGene00004011			WBGene00017159		WBGene00022664	WBGene00007963	WBGene00001924	WBGene00013042		WBGene00000298
WBGene00001944		WBGene00000730	WBGene00009740			WBGene00010554	WBGene00004013			WBGene00017269		WBGene00022738	WBGene00007964	WBGene00001930	WBGene00013177		WBGene00000366
WBGene00001957		WBGene00000731	WBGene00009932			WBGene00010730	WBGene00004044			WBGene00017289		WBGene00022797	WBGene00007967	WBGene00001934	WBGene00013416		WBGene00000368
WBGene00001960		WBGene00000732	WBGene00009980			WBGene00010763	WBGene00004048			WBGene00017812		WBGene00022815	WBGene00008018	WBGene00001938	WBGene00013643		WBGene00000369
WBGene00001971		WBGene00000733	WBGene00010109			WBGene00010867	WBGene00004086			WBGene00017909		WBGene00043705	WBGene00008238	WBGene00001941	WBGene00013668		WBGene00000372
WBGene00001985		WBGene00000734	WBGene00010192			WBGene00010936	WBGene00004147			WBGene00017954			WBGene00008274	WBGene00001948	WBGene00013855		WBGene00000375
WBGene00002018		WBGene00000735	WBGene00010199			WBGene00010959	WBGene00004189			WBGene00018206			WBGene00008316	WBGene00001949	WBGene00013971		WBGene00000376
WBGene00002019		WBGene00000737	WBGene00010302			WBGene00010960	WBGene00004264			WBGene00018269			WBGene00008400	WBGene00001952	WBGene00013972		WBGene00000377
WBGene00002020		WBGene00000738	WBGene00010345			WBGene00010962	WBGene00004303			WBGene00018527			WBGene00008430	WBGene00001953	WBGene00014261		WBGene00000378
WBGene00002024		WBGene00000739	WBGene00010349			WBGene00010963	WBGene00004306			WBGene00018564			WBGene00008443	WBGene00001955	WBGene00015356		WBGene00000379
WBGene00002037		WBGene00000740	WBGene00010456			WBGene00010964	WBGene00004312			WBGene00019087			WBGene00008504	WBGene00001975	WBGene00015581		WBGene00000380
WBGene00002055		WBGene00000741	WBGene00010498			WBGene00010965	WBGene00004401			WBGene00019478			WBGene00008565	WBGene00001994	WBGene00015815		WBGene00000381
WBGene00002056		WBGene00000742	WBGene00010619			WBGene00010967	WBGene00004410			WBGene00019667			WBGene00008621	WBGene00001997	WBGene00016245		WBGene00000383
WBGene00002057		WBGene00000743	WBGene00010783			WBGene00011052	WBGene00004443			WBGene00019730			WBGene00008683	WBGene00001998	WBGene00016283		WBGene00000390
WBGene00002058		WBGene00000744	WBGene00011130			WBGene00011054	WBGene00004737			WBGene00019767			WBGene00008694	WBGene00002002	WBGene00016655		WBGene00000393
WBGene00002059		WBGene00000745	WBGene00011173			WBGene00011059	WBGene00004786			WBGene00019808			WBGene00008750	WBGene00002004	WBGene00016848		WBGene00000403
WBGene00002060		WBGene00000746	WBGene00011205			WBGene00011181	WBGene00004798			WBGene00019831			WBGene00009064	WBGene00002046	WBGene00016879		WBGene00000405
WBGene00002063		WBGene00000747	WBGene00011273			WBGene00011218	WBGene00004857			WBGene00019895			WBGene00009126	WBGene00002048	WBGene00017025		WBGene00000407
WBGene00002073		WBGene00000748	WBGene00011330			WBGene00011333	WBGene00004898			WBGene00019937			WBGene00009127	WBGene00002050	WBGene00017103		WBGene00000408
WBGene00002151		WBGene00000749	WBGene00011424			WBGene00011444	WBGene00004923			WBGene00019940			WBGene00009165	WBGene00002051	WBGene00018017		WBGene00000409
WBGene00002174		WBGene00000751	WBGene00011635			WBGene00011486	WBGene00004924			WBGene00020016			WBGene00009286	WBGene00002052	WBGene00018319		WBGene00000410
WBGene00002177		WBGene00000752	WBGene00011730			WBGene00011755	WBGene00004933			WBGene00020037			WBGene00009292	WBGene00002066	WBGene00018398		WBGene00000416
WBGene00002214		WBGene00000753	WBGene00011739			WBGene00011776	WBGene00006063			WBGene00020094			WBGene00009435	WBGene00002079	WBGene00019240		WBGene00000417
WBGene00002220		WBGene00000754	WBGene00011859			WBGene00011807	WBGene00006331			WBGene00020299			WBGene00009475	WBGene00002150	WBGene00019770		WBGene00000419
WBGene00002783		WBGene00000757	WBGene00011866			WBGene00011835	WBGene00006392			WBGene00020516			WBGene00009622	WBGene00002173	WBGene00019893		WBGene00000422
WBGene00002827		WBGene00000759	WBGene00011883			WBGene00011906	WBGene00006475			WBGene00020556			WBGene00009654	WBGene00002175	WBGene00020107		WBGene00000426
WBGene00002881		WBGene00000775	WBGene00011932			WBGene00011994	WBGene00006487			WBGene00020901			WBGene00009781	WBGene00002176	WBGene00021461		WBGene00000435
WBGene00002974		WBGene00000908	WBGene00011953			WBGene00012016	WBGene00006496			WBGene00021041			WBGene00009793	WBGene00002179	WBGene00021515		WBGene00000437
WBGene00003015		WBGene00001036	WBGene00012013			WBGene00012170	WBGene00006587			WBGene00021093			WBGene00009801	WBGene00002216	WBGene00021752		WBGene00000443
WBGene00003031		WBGene00001064	WBGene00012352			WBGene00012251	WBGene00006588			WBGene00021406			WBGene00009831	WBGene00002227	WBGene00021914		WBGene00000451
WBGene00003055		WBGene00001065	WBGene00012437			WBGene00012253	WBGene00006589			WBGene00021421			WBGene00009865	WBGene00002252	WBGene00021963		WBGene00000452
WBGene00003087		WBGene00001066	WBGene00012466			WBGene00012280	WBGene00006608			WBGene00021709			WBGene00010013	WBGene00002276	WBGene00022076		WBGene00000464
WBGene00003111		WBGene00001067	WBGene00012549			WBGene00012467	WBGene00006609			WBGene00021931			WBGene00010045	WBGene00002295	WBGene00022162		WBGene00000466
WBGene00003170		WBGene00001069	WBGene00012560			WBGene00012531	WBGene00006611			WBGene00022170			WBGene00010139	WBGene00002583	WBGene00022242		WBGene00000476
WBGene00003209		WBGene00001074	WBGene00012738			WBGene00012626	WBGene00006712			WBGene00022180			WBGene00010286	WBGene00002601	WBGene00022593		WBGene00000479
WBGene00003236		WBGene00001075	WBGene00012889			WBGene00012648	WBGene00006718			WBGene00022642			WBGene00010296	WBGene00002804	WBGene00044236		WBGene00000480
WBGene00003241		WBGene00001076	WBGene00013030			WBGene00012767	WBGene00006736			WBGene00022816			WBGene00010364	WBGene00002850			WBGene00000481
WBGene00003385		WBGene00001186	WBGene00013138			WBGene00012811	WBGene00006802			WBGene00044201			WBGene00010609	WBGene00002982			WBGene00000482
WBGene00003395		WBGene00001253	WBGene00013161			WBGene00012826	WBGene00006814						WBGene00010638	WBGene00002986			WBGene00000484
WBGene00003402		WBGene00001324	WBGene00013231			WBGene00012994	WBGene00006816						WBGene00010875	WBGene00002987			WBGene00000490
WBGene00003499		WBGene00001337	WBGene00013353			WBGene00013075	WBGene00006820						WBGene00010915	WBGene00003033			WBGene00000491
WBGene00003507		WBGene00001438	WBGene00013440			WBGene00013106	WBGene00006844						WBGene00011035	WBGene00003034			WBGene00000492
WBGene00003520		WBGene00001565	WBGene00013603			WBGene00013147	WBGene00006914						WBGene00011123	WBGene00003037			WBGene00000498
WBGene00003521		WBGene00001583	WBGene00013604			WBGene00013207	WBGene00006915						WBGene00011436	WBGene00003058			WBGene00000499
WBGene00003522		WBGene00002027	WBGene00013672			WBGene00013290	WBGene00006916						WBGene00011437	WBGene00003068			WBGene00000500
WBGene00003524		WBGene00002032	WBGene00013715			WBGene00013308	WBGene00006940						WBGene00011532	WBGene00003084			WBGene00000501
WBGene00003525		WBGene00002033	WBGene00013807			WBGene00013703	WBGene00006971						WBGene00011580	WBGene00003089			WBGene00000502
WBGene00003531		WBGene00002263	WBGene00013866			WBGene00013857	WBGene00007100						WBGene00011615	WBGene00003106			WBGene00000506
WBGene00003564		WBGene00003035	WBGene00013896			WBGene00013877	WBGene00007140						WBGene00011732	WBGene00003130			WBGene00000508
WBGene00003590		WBGene00003057	WBGene00014300			WBGene00013996	WBGene00007223						WBGene00011878	WBGene00003132			WBGene00000510
WBGene00003591		WBGene00003210	WBGene00015049			WBGene00014220	WBGene00007258						WBGene00011980	WBGene00003134			WBGene00000515
WBGene00003593		WBGene00003258	WBGene00015057			WBGene00014669	WBGene00007303						WBGene00012184	WBGene00003149			WBGene00000518
WBGene00003599		WBGene00003388	WBGene00015307			WBGene00015050	WBGene00007643						WBGene00012276	WBGene00003155			WBGene00000519
WBGene00003613		WBGene00003523	WBGene00015338			WBGene00015112	WBGene00007668						WBGene00012348	WBGene00003166			WBGene00000530
WBGene00003628		WBGene00003607	WBGene00015471			WBGene00015113	WBGene00007680						WBGene00012360	WBGene00003172			WBGene00000532
WBGene00003732		WBGene00003773	WBGene00015565			WBGene00015190	WBGene00007774						WBGene00012739	WBGene00003183			WBGene00000533
WBGene00003785		WBGene00003792	WBGene00015660			WBGene00015287	WBGene00007786						WBGene00013002	WBGene00003220			WBGene00000536
WBGene00003790		WBGene00003842	WBGene00015691			WBGene00015501	WBGene00007913						WBGene00013132	WBGene00003225			WBGene00000539
WBGene00003843		WBGene00003864	WBGene00015965			WBGene00015564	WBGene00007955						WBGene00013139	WBGene00003234			WBGene00000540
WBGene00003962		WBGene00003865	WBGene00015994			WBGene00015673	WBGene00008092						WBGene00013215	WBGene00003367			WBGene00000541
WBGene00004020		WBGene00003976	WBGene00016247			WBGene00015865	WBGene00008127						WBGene00013312	WBGene00003373			WBGene00000542
WBGene00004023		WBGene00004132	WBGene00016343			WBGene00015914	WBGene00008275						WBGene00013446	WBGene00003374			WBGene00000543
WBGene00004056		WBGene00004249	WBGene00016348			WBGene00015942	WBGene00008283						WBGene00013650	WBGene00003377			WBGene00000545
WBGene00004057		WBGene00004300	WBGene00016413			WBGene00015993	WBGene00008297						WBGene00013739	WBGene00003387			WBGene00000546
WBGene00004062		WBGene00004363	WBGene00016427			WBGene00016060	WBGene00008330						WBGene00013847	WBGene00003394			WBGene00000547
WBGene00004115		WBGene00004397	WBGene00016443			WBGene00016061	WBGene00008346						WBGene00013869	WBGene00003404			WBGene00000549
WBGene00004146		WBGene00004398	WBGene00016558			WBGene00016134	WBGene00008387						WBGene00013914	WBGene00003418			WBGene00000550
WBGene00004216		WBGene00004804	WBGene00016721			WBGene00016196	WBGene00008441						WBGene00014001	WBGene00003472			WBGene00000553
WBGene00004218		WBGene00004928	WBGene00016728			WBGene00016202	WBGene00008521						WBGene00014058	WBGene00003476			WBGene00000554
WBGene00004219		WBGene00004963	WBGene00016764			WBGene00016265	WBGene00008551						WBGene00014076	WBGene00003485			WBGene00000561
WBGene00004220		WBGene00004993	WBGene00016868			WBGene00016375	WBGene00008592						WBGene00014139	WBGene00003504			WBGene00000565
WBGene00004221		WBGene00005006	WBGene00016991			WBGene00016545	WBGene00008601						WBGene00014232	WBGene00003510			WBGene00000566
WBGene00004222		WBGene00005009	WBGene00016996			WBGene00016546	WBGene00008607						WBGene00014697	WBGene00003516			WBGene00000567
WBGene00004223		WBGene00005016	WBGene00017064			WBGene00016547	WBGene00008690						WBGene00015135	WBGene00003582			WBGene00000585
WBGene00004225		WBGene00005017	WBGene00017135			WBGene00016549	WBGene00008785						WBGene00015188	WBGene00003585			WBGene00000591
WBGene00004226		WBGene00006055	WBGene00017140			WBGene00016550	WBGene00008890						WBGene00015251	WBGene00003592			WBGene00000761
WBGene00004227		WBGene00006556	WBGene00017219			WBGene00016729	WBGene00008936						WBGene00015516	WBGene00003594			WBGene00000762
WBGene00004228		WBGene00006557	WBGene00017240			WBGene00016987	WBGene00009058						WBGene00015777	WBGene00003595			WBGene00000763
WBGene00004229		WBGene00006580	WBGene00017285			WBGene00017039	WBGene00009059						WBGene00015887	WBGene00003605			WBGene00000764
WBGene00004230		WBGene00006616	WBGene00017369			WBGene00017045	WBGene00009146						WBGene00016397	WBGene00003681			WBGene00000765
WBGene00004231		WBGene00006690	WBGene00017487			WBGene00017078	WBGene00009178						WBGene00016540	WBGene00003738			WBGene00000766
WBGene00004232		WBGene00006852	WBGene00017513			WBGene00017170	WBGene00009226						WBGene00016739	WBGene00003796			WBGene00000767
WBGene00004234		WBGene00006947	WBGene00017515			WBGene00017419	WBGene00009245						WBGene00016907	WBGene00003822			WBGene00000768
WBGene00004235		WBGene00006948	WBGene00017800			WBGene00017482	WBGene00009271						WBGene00017166	WBGene00003825			WBGene00000773
WBGene00004236		WBGene00006950	WBGene00017916			WBGene00017705	WBGene00009326						WBGene00017389	WBGene00003827			WBGene00000774
WBGene00004237		WBGene00006952	WBGene00017982			WBGene00017707	WBGene00009370						WBGene00017733	WBGene00003830			WBGene00000776
WBGene00004239		WBGene00006953	WBGene00018074			WBGene00017760	WBGene00009484						WBGene00017771	WBGene00003836			WBGene00000778
WBGene00004241		WBGene00006954	WBGene00018301			WBGene00017967	WBGene00009540						WBGene00017973	WBGene00003846			WBGene00000787
WBGene00004242		WBGene00006955	WBGene00018350			WBGene00018006	WBGene00009558						WBGene00017996	WBGene00003847			WBGene00000788
WBGene00004243		WBGene00006978	WBGene00018361			WBGene00018061	WBGene00009584						WBGene00018042	WBGene00003889			WBGene00000793
WBGene00004275		WBGene00006982	WBGene00018405			WBGene00018354	WBGene00009648						WBGene00018051	WBGene00003918			WBGene00000794
WBGene00004349		WBGene00007016	WBGene00018481			WBGene00018566	WBGene00009730						WBGene00018138	WBGene00003938			WBGene00000796
WBGene00004384		WBGene00007064	WBGene00018516			WBGene00018568	WBGene00009824						WBGene00018181	WBGene00003948			WBGene00000798
WBGene00004702		WBGene00007072	WBGene00018531			WBGene00018572	WBGene00009880						WBGene00018370	WBGene00003953			WBGene00000799
WBGene00004765		WBGene00007073	WBGene00018716			WBGene00018611	WBGene00009899						WBGene00018431	WBGene00003955			WBGene00000800
WBGene00004775		WBGene00007153	WBGene00018783			WBGene00018661	WBGene00009924						WBGene00018609	WBGene00003980			WBGene00000802
WBGene00004795		WBGene00007369	WBGene00018867			WBGene00018812	WBGene00009929						WBGene00018738	WBGene00004024			WBGene00000812
WBGene00004809		WBGene00007422	WBGene00019055			WBGene00018900	WBGene00009939						WBGene00018739	WBGene00004031			WBGene00000814
WBGene00004810		WBGene00007455	WBGene00019146			WBGene00019096	WBGene00009993						WBGene00018998	WBGene00004051			WBGene00000817
WBGene00004811		WBGene00007587	WBGene00019272			WBGene00019185	WBGene00010063						WBGene00019395	WBGene00004052			WBGene00000818
WBGene00004812		WBGene00007650	WBGene00019274			WBGene00019225	WBGene00010067						WBGene00019510	WBGene00004068			WBGene00000822
WBGene00004859		WBGene00007670	WBGene00019407			WBGene00019328	WBGene00010120						WBGene00019616	WBGene00004076			WBGene00000830
WBGene00004890		WBGene00007702	WBGene00019677			WBGene00019339	WBGene00010204						WBGene00019693	WBGene00004077			WBGene00000831
WBGene00004893		WBGene00007709	WBGene00019920			WBGene00019342	WBGene00010230						WBGene00020190	WBGene00004095			WBGene00000832
WBGene00004894		WBGene00007740	WBGene00020089			WBGene00019349	WBGene00010339						WBGene00020230	WBGene00004117			WBGene00000833
WBGene00004926		WBGene00007820	WBGene00020130			WBGene00019612	WBGene00010380						WBGene00020256	WBGene00004130			WBGene00000834
WBGene00004958		WBGene00007885	WBGene00020300			WBGene00019686	WBGene00010383						WBGene00020262	WBGene00004140			WBGene00000836
WBGene00004984		WBGene00007946	WBGene00020369			WBGene00019782	WBGene00010423						WBGene00020273	WBGene00004166			WBGene00000837
WBGene00006065		WBGene00007966	WBGene00020380			WBGene00019792	WBGene00010593						WBGene00020389	WBGene00004191			WBGene00000838
WBGene00006067		WBGene00008097	WBGene00020563			WBGene00019959	WBGene00010614						WBGene00020426	WBGene00004192			WBGene00000840
WBGene00006375		WBGene00008222	WBGene00020823			WBGene00019980	WBGene00010616						WBGene00020866	WBGene00004193			WBGene00000843
WBGene00006380		WBGene00008290	WBGene00021021			WBGene00020017	WBGene00010671						WBGene00020955	WBGene00004195			WBGene00000846
WBGene00006384		WBGene00008294	WBGene00021348			WBGene00020208	WBGene00010709						WBGene00021152	WBGene00004199			WBGene00000854
WBGene00006395		WBGene00008304	WBGene00021367			WBGene00020283	WBGene00010716						WBGene00021316	WBGene00004217			WBGene00000857
WBGene00006454		WBGene00008477	WBGene00021640			WBGene00020307	WBGene00010731						WBGene00021423	WBGene00004224			WBGene00000858
WBGene00006484		WBGene00008485	WBGene00021689			WBGene00020498	WBGene00010755						WBGene00021486	WBGene00004233			WBGene00000869
WBGene00006499		WBGene00008486	WBGene00021692			WBGene00020646	WBGene00010767						WBGene00021528	WBGene00004271			WBGene00000871
WBGene00006544		WBGene00008491	WBGene00021750			WBGene00020694	WBGene00010768						WBGene00021597	WBGene00004296			WBGene00000874
WBGene00006570		WBGene00008512	WBGene00021785			WBGene00020827	WBGene00010812						WBGene00021715	WBGene00004317			WBGene00000875
WBGene00006576		WBGene00008549	WBGene00021787			WBGene00020875	WBGene00010909						WBGene00021741	WBGene00004318			WBGene00000876
WBGene00006582		WBGene00008604	WBGene00021935			WBGene00020888	WBGene00011067						WBGene00022158	WBGene00004335			WBGene00000880
WBGene00006593		WBGene00008652	WBGene00021984			WBGene00020889	WBGene00011230						WBGene00022256	WBGene00004336			WBGene00000881
WBGene00006604		WBGene00008748	WBGene00022004			WBGene00020954	WBGene00011242						WBGene00022435	WBGene00004340			WBGene00000882
WBGene00006610		WBGene00008891	WBGene00022048			WBGene00021209	WBGene00011283						WBGene00022519	WBGene00004343			WBGene00000884
WBGene00006621		WBGene00008957	WBGene00022300			WBGene00021249	WBGene00011318						WBGene00022536	WBGene00004364			WBGene00000886
WBGene00006640		WBGene00009001	WBGene00022367			WBGene00021304	WBGene00011401						WBGene00022721	WBGene00004372			WBGene00000887
WBGene00006659		WBGene00009009	WBGene00022511			WBGene00021332	WBGene00011439						WBGene00022759	WBGene00004375			WBGene00000888
WBGene00006664		WBGene00009032	WBGene00022554			WBGene00021457	WBGene00011522						WBGene00022853	WBGene00004403			WBGene00000890
WBGene00006666		WBGene00009110	WBGene00022647			WBGene00021613	WBGene00011556						WBGene00044144	WBGene00004404			WBGene00000892
WBGene00006667		WBGene00009113	WBGene00022672			WBGene00021645	WBGene00011587						WBGene00044233	WBGene00004424			WBGene00000896
WBGene00006670		WBGene00009156	WBGene00022682			WBGene00021778	WBGene00011589						WBGene00044738	WBGene00004442			WBGene00000903
WBGene00006673		WBGene00009255	WBGene00022783			WBGene00021796	WBGene00011688							WBGene00004450			WBGene00000906
WBGene00006674		WBGene00009306	WBGene00022854			WBGene00021994	WBGene00011824							WBGene00004453			WBGene00000914
WBGene00006676		WBGene00009314	WBGene00022881			WBGene00022077	WBGene00011828							WBGene00004459			WBGene00000915
WBGene00006681		WBGene00009362	WBGene00022887			WBGene00022138	WBGene00011830							WBGene00004469			WBGene00000917
WBGene00006687		WBGene00009384	WBGene00023491			WBGene00022313	WBGene00011871							WBGene00004493			WBGene00000923
WBGene00006693		WBGene00009386	WBGene00044067			WBGene00022454	WBGene00011882							WBGene00004680			WBGene00000931
WBGene00006694		WBGene00009445	WBGene00044260			WBGene00022567	WBGene00011936							WBGene00004701			WBGene00000933
WBGene00006710		WBGene00009492	WBGene00044330			WBGene00022568	WBGene00011955							WBGene00004719			WBGene00000934
WBGene00006717		WBGene00009587	WBGene00044568			WBGene00022570	WBGene00011965							WBGene00004723			WBGene00000936
WBGene00006719		WBGene00009661	WBGene00045237			WBGene00022572	WBGene00012073							WBGene00004732			WBGene00000937
WBGene00006737		WBGene00009663	WBGene00045407			WBGene00022573	WBGene00012131							WBGene00004762			WBGene00000939
WBGene00006739		WBGene00009773	WBGene00045433			WBGene00022574	WBGene00012150							WBGene00004771			WBGene00000940
WBGene00006741		WBGene00009796	WBGene00045484			WBGene00022631	WBGene00012186							WBGene00004773			WBGene00000959
WBGene00006765		WBGene00009854	WBGene00009325			WBGene00022663	WBGene00012201							WBGene00004793			WBGene00000960
WBGene00006784		WBGene00009855	WBGene00013730			WBGene00022773	WBGene00012302							WBGene00004803			WBGene00000962
WBGene00006827		WBGene00009856	WBGene00019884			WBGene00022808	WBGene00012356							WBGene00004874			WBGene00000963
WBGene00006861		WBGene00009857				WBGene00044608	WBGene00012389							WBGene00004879			WBGene00000964
WBGene00006959		WBGene00009859				WBGene00045063	WBGene00012445							WBGene00004881			WBGene00000966
WBGene00006988		WBGene00009860					WBGene00012558							WBGene00004884			WBGene00000967
WBGene00007006		WBGene00009897					WBGene00012712							WBGene00004886			WBGene00000970
WBGene00007041		WBGene00010155					WBGene00012794							WBGene00004887			WBGene00000971
WBGene00007067		WBGene00010167					WBGene00012813							WBGene00004889			WBGene00000973
WBGene00007071		WBGene00010169					WBGene00012828							WBGene00004915			WBGene00000974
WBGene00007130		WBGene00010228					WBGene00012829							WBGene00004950			WBGene00000976
WBGene00007141		WBGene00010399					WBGene00012855							WBGene00004952			WBGene00000979
WBGene00007170		WBGene00010583					WBGene00012894							WBGene00004979			WBGene00000981
WBGene00007176		WBGene00010661					WBGene00012970							WBGene00004981			WBGene00000982
WBGene00007190		WBGene00010694					WBGene00012990							WBGene00004985			WBGene00000983
WBGene00007252		WBGene00010766					WBGene00012997							WBGene00005013			WBGene00000984
WBGene00007255		WBGene00010784					WBGene00013014							WBGene00005024			WBGene00000988
WBGene00007270		WBGene00010796					WBGene00013043							WBGene00005642			WBGene00000993
WBGene00007307		WBGene00010905					WBGene00013188							WBGene00005643			WBGene00000996
WBGene00007328		WBGene00011248					WBGene00013189							WBGene00005647			WBGene00001001
WBGene00007331		WBGene00011259					WBGene00013239							WBGene00005648			WBGene00001005
WBGene00007356		WBGene00011454					WBGene00013260							WBGene00006324			WBGene00001006
WBGene00007362		WBGene00011584					WBGene00013541							WBGene00006363			WBGene00001007
WBGene00007396		WBGene00011742					WBGene00013575							WBGene00006365			WBGene00001016
WBGene00007462		WBGene00011779					WBGene00013585							WBGene00006385			WBGene00001017
WBGene00007602		WBGene00011852					WBGene00013654							WBGene00006390			WBGene00001018
WBGene00007605		WBGene00011853					WBGene00013665							WBGene00006391			WBGene00001019
WBGene00007732		WBGene00011918					WBGene00013674							WBGene00006393			WBGene00001020
WBGene00007764		WBGene00012010					WBGene00013677							WBGene00006396			WBGene00001025
WBGene00007813		WBGene00012022					WBGene00013680							WBGene00006406			WBGene00001026
WBGene00007824		WBGene00012023					WBGene00013792							WBGene00006411			WBGene00001027
WBGene00007825		WBGene00012024					WBGene00013862							WBGene00006423			WBGene00001028
WBGene00008022		WBGene00012025					WBGene00013881							WBGene00006468			WBGene00001029
WBGene00008065		WBGene00012103					WBGene00014052							WBGene00006476			WBGene00001030
WBGene00008107		WBGene00012166					WBGene00014077							WBGene00006489			WBGene00001031
WBGene00008129		WBGene00012172					WBGene00014208							WBGene00006508			WBGene00001032
WBGene00008144		WBGene00012236					WBGene00014226							WBGene00006513			WBGene00001035
WBGene00008147		WBGene00012317					WBGene00014240							WBGene00006514			WBGene00001037
WBGene00008159		WBGene00012330					WBGene00014938							WBGene00006516			WBGene00001038
WBGene00008160		WBGene00012332					WBGene00015074							WBGene00006519			WBGene00001039
WBGene00008161		WBGene00012379					WBGene00015091							WBGene00006524			WBGene00001040
WBGene00008162		WBGene00012582					WBGene00015098							WBGene00006540			WBGene00001041
WBGene00008214		WBGene00012583					WBGene00015130							WBGene00006571			WBGene00001042
WBGene00008260		WBGene00012621					WBGene00015150							WBGene00006572			WBGene00001045
WBGene00008265		WBGene00012678					WBGene00015247							WBGene00006574			WBGene00001046
WBGene00008270		WBGene00012782					WBGene00015273							WBGene00006584			WBGene00001047
WBGene00008284		WBGene00013021					WBGene00015303							WBGene00006585			WBGene00001048
WBGene00008291		WBGene00013240					WBGene00015336							WBGene00006586			WBGene00001049
WBGene00008293		WBGene00013273					WBGene00015337							WBGene00006601			WBGene00001051
WBGene00008296		WBGene00013292					WBGene00015349							WBGene00006652			WBGene00001052
WBGene00008409		WBGene00013443					WBGene00015406							WBGene00006704			WBGene00001054
WBGene00008433		WBGene00013480					WBGene00015418							WBGene00006705			WBGene00001055
WBGene00008471		WBGene00013486					WBGene00015462							WBGene00006706			WBGene00001056
WBGene00008476		WBGene00013487					WBGene00015464							WBGene00006714			WBGene00001058
WBGene00008478		WBGene00013489					WBGene00015499							WBGene00006721			WBGene00001073
WBGene00008479		WBGene00013493					WBGene00015648							WBGene00006722			WBGene00001077
WBGene00008499		WBGene00013607					WBGene00015650							WBGene00006723			WBGene00001078
WBGene00008533		WBGene00013608					WBGene00015704							WBGene00006725			WBGene00001082
WBGene00008542		WBGene00013609					WBGene00015789							WBGene00006726			WBGene00001087
WBGene00008560		WBGene00013900					WBGene00015939							WBGene00006735			WBGene00001089
WBGene00008581		WBGene00013901					WBGene00016062							WBGene00006738			WBGene00001090
WBGene00008591		WBGene00013904					WBGene00016066							WBGene00006744			WBGene00001092
WBGene00008692		WBGene00013905					WBGene00016101							WBGene00006752			WBGene00001093
WBGene00008707		WBGene00013906					WBGene00016116							WBGene00006764			WBGene00001094
WBGene00008714		WBGene00013967					WBGene00016147							WBGene00006773			WBGene00001095
WBGene00008762		WBGene00013970					WBGene00016162							WBGene00006794			WBGene00001115
WBGene00008776		WBGene00014020					WBGene00016269							WBGene00006811			WBGene00001117
WBGene00008779		WBGene00014078					WBGene00016412							WBGene00006812			WBGene00001118
WBGene00008787		WBGene00014093					WBGene00016421							WBGene00006868			WBGene00001119
WBGene00008801		WBGene00014117					WBGene00016504							WBGene00006869			WBGene00001121
WBGene00008802		WBGene00014137					WBGene00016589							WBGene00006875			WBGene00001122
WBGene00008804		WBGene00014138					WBGene00016600							WBGene00006882			WBGene00001127
WBGene00008829		WBGene00015019					WBGene00016614							WBGene00006893			WBGene00001129
WBGene00008861		WBGene00015110					WBGene00016631							WBGene00006911			WBGene00001130
WBGene00008905		WBGene00015111					WBGene00016652							WBGene00006912			WBGene00001131
WBGene00008911		WBGene00015114					WBGene00016793							WBGene00006920			WBGene00001132
WBGene00008932		WBGene00015145					WBGene00016845							WBGene00006941			WBGene00001134
WBGene00008969		WBGene00015198					WBGene00016846							WBGene00006970			WBGene00001135
WBGene00008976		WBGene00015332					WBGene00016911							WBGene00006975			WBGene00001149
WBGene00008997		WBGene00015403					WBGene00016973							WBGene00006999			WBGene00001150
WBGene00008998		WBGene00015466					WBGene00017080							WBGene00007012			WBGene00001151
WBGene00009073		WBGene00015487					WBGene00017123							WBGene00007017			WBGene00001153
WBGene00009089		WBGene00015532					WBGene00017164							WBGene00007019			WBGene00001154
WBGene00009142		WBGene00015535					WBGene00017328							WBGene00007022			WBGene00001155
WBGene00009148		WBGene00015639					WBGene00017357							WBGene00007027			WBGene00001160
WBGene00009162		WBGene00015641					WBGene00017360							WBGene00007043			WBGene00001163
WBGene00009192		WBGene00015642					WBGene00017437							WBGene00007047			WBGene00001171
WBGene00009251		WBGene00015651					WBGene00017676							WBGene00007101			WBGene00001172
WBGene00009263		WBGene00015680					WBGene00017742							WBGene00007104			WBGene00001173
WBGene00009323		WBGene00015692					WBGene00017757							WBGene00007107			WBGene00001177
WBGene00009340		WBGene00015694					WBGene00017860							WBGene00007108			WBGene00001179
WBGene00009347		WBGene00015695					WBGene00017921							WBGene00007118			WBGene00001187
WBGene00009378		WBGene00015739					WBGene00017931							WBGene00007126			WBGene00001188
WBGene00009444		WBGene00015807					WBGene00018023							WBGene00007146			WBGene00001189
WBGene00009447		WBGene00015841					WBGene00018366							WBGene00007186			WBGene00001196
WBGene00009456		WBGene00015982					WBGene00018475							WBGene00007195			WBGene00001202
WBGene00009499		WBGene00016006					WBGene00018567							WBGene00007200			WBGene00001208
WBGene00009508		WBGene00016013					WBGene00018593							WBGene00007312			WBGene00001209
WBGene00009548		WBGene00016024					WBGene00018698							WBGene00007333			WBGene00001215
WBGene00009578		WBGene00016088					WBGene00018757							WBGene00007386			WBGene00001224
WBGene00009582		WBGene00016190					WBGene00018819							WBGene00007433			WBGene00001225
WBGene00009695		WBGene00016191					WBGene00018831							WBGene00007434			WBGene00001226
WBGene00009729		WBGene00016389					WBGene00019030							WBGene00007443			WBGene00001227
WBGene00009743		WBGene00016393					WBGene00019128							WBGene00007464			WBGene00001228
WBGene00009818		WBGene00016450					WBGene00019237							WBGene00007476			WBGene00001229
WBGene00009876		WBGene00016451					WBGene00019264							WBGene00007488			WBGene00001230
WBGene00009937		WBGene00016577					WBGene00019301							WBGene00007507			WBGene00001231
WBGene00009942		WBGene00016747					WBGene00019394							WBGene00007508			WBGene00001232
WBGene00009956		WBGene00016762					WBGene00019584							WBGene00007509			WBGene00001233
WBGene00009960		WBGene00016769					WBGene00019617							WBGene00007520			WBGene00001234
WBGene00009977		WBGene00016794					WBGene00019636							WBGene00007529			WBGene00001236
WBGene00010010		WBGene00016865					WBGene00019786							WBGene00007588			WBGene00001241
WBGene00010011		WBGene00016903					WBGene00019817							WBGene00007603			WBGene00001248
WBGene00010037		WBGene00016912					WBGene00019875							WBGene00007616			WBGene00001258
WBGene00010047		WBGene00016944					WBGene00019883							WBGene00007625			WBGene00001259
WBGene00010082		WBGene00016951					WBGene00019935							WBGene00007645			WBGene00001262
WBGene00010134		WBGene00016974					WBGene00019965							WBGene00007653			WBGene00001263
WBGene00010162		WBGene00016997					WBGene00019986							WBGene00007690			WBGene00001303
WBGene00010182		WBGene00017034					WBGene00020031							WBGene00007698			WBGene00001320
WBGene00010280		WBGene00017065					WBGene00020036							WBGene00007704			WBGene00001328
WBGene00010282		WBGene00017120					WBGene00020163							WBGene00007708			WBGene00001331
WBGene00010309		WBGene00017315					WBGene00020166							WBGene00007744			WBGene00001333
WBGene00010323		WBGene00017329					WBGene00020197							WBGene00007745			WBGene00001335
WBGene00010329		WBGene00017331					WBGene00020284							WBGene00007752			WBGene00001336
WBGene00010409		WBGene00017332					WBGene00020321							WBGene00007756			WBGene00001338
WBGene00010411		WBGene00017333					WBGene00020348							WBGene00007761			WBGene00001340
WBGene00010470		WBGene00017336					WBGene00020368							WBGene00007772			WBGene00001352
WBGene00010471		WBGene00017364					WBGene00020427							WBGene00007904			WBGene00001358
WBGene00010472		WBGene00017449					WBGene00020444							WBGene00007923			WBGene00001366
WBGene00010473		WBGene00017535					WBGene00020471							WBGene00007965			WBGene00001368
WBGene00010545		WBGene00017723					WBGene00020486							WBGene00007979			WBGene00001372
WBGene00010558		WBGene00017735					WBGene00020530							WBGene00007984			WBGene00001374
WBGene00010572		WBGene00017886					WBGene00020770							WBGene00007995			WBGene00001377
WBGene00010626		WBGene00017959					WBGene00020784							WBGene00008008			WBGene00001397
WBGene00010637		WBGene00017968					WBGene00020903							WBGene00008034			WBGene00001398
WBGene00010654		WBGene00018000					WBGene00021167							WBGene00008094			WBGene00001399
WBGene00010666		WBGene00018071					WBGene00021185							WBGene00008140			WBGene00001404
WBGene00010678		WBGene00018105					WBGene00021227							WBGene00008148			WBGene00001405
WBGene00010681		WBGene00018214					WBGene00021320							WBGene00008149			WBGene00001411
WBGene00010684		WBGene00018215					WBGene00021376							WBGene00008183			WBGene00001412
WBGene00010698		WBGene00018384					WBGene00021412							WBGene00008220			WBGene00001414
WBGene00010700		WBGene00018385					WBGene00021502							WBGene00008224			WBGene00001423
WBGene00010738		WBGene00018403					WBGene00021507							WBGene00008252			WBGene00001426
WBGene00010770		WBGene00018433					WBGene00021544							WBGene00008317			WBGene00001431
WBGene00010828		WBGene00018478					WBGene00021629							WBGene00008348			WBGene00001443
WBGene00010834		WBGene00018479					WBGene00021667							WBGene00008361			WBGene00001470
WBGene00010888		WBGene00018480					WBGene00021812							WBGene00008412			WBGene00001475
WBGene00010913		WBGene00018543					WBGene00021852							WBGene00008418			WBGene00001476
WBGene00010999		WBGene00018692					WBGene00021856							WBGene00008419			WBGene00001477
WBGene00011000		WBGene00018906					WBGene00021900							WBGene00008424			WBGene00001478
WBGene00011053		WBGene00019079					WBGene00021933							WBGene00008426			WBGene00001480
WBGene00011055		WBGene00019227					WBGene00021945							WBGene00008427			WBGene00001485
WBGene00011076		WBGene00019232					WBGene00022021							WBGene00008428			WBGene00001497
WBGene00011088		WBGene00019233					WBGene00022025							WBGene00008429			WBGene00001498
WBGene00011090		WBGene00019234					WBGene00022040							WBGene00008435			WBGene00001499
WBGene00011092		WBGene00019235					WBGene00022053							WBGene00008457			WBGene00001500
WBGene00011093		WBGene00019284					WBGene00022057							WBGene00008458			WBGene00001501
WBGene00011102		WBGene00019376					WBGene00022348							WBGene00008506			WBGene00001502
WBGene00011105		WBGene00019379					WBGene00022365							WBGene00008547			WBGene00001503
WBGene00011112		WBGene00019515					WBGene00022379							WBGene00008548			WBGene00001507
WBGene00011175		WBGene00019516					WBGene00022392							WBGene00008555			WBGene00001508
WBGene00011249		WBGene00019590					WBGene00022492							WBGene00008665			WBGene00001509
WBGene00011262		WBGene00019600					WBGene00022512							WBGene00008667			WBGene00001510
WBGene00011266		WBGene00019606					WBGene00022583							WBGene00008722			WBGene00001512
WBGene00011270		WBGene00019649					WBGene00022635							WBGene00008745			WBGene00001515
WBGene00011279		WBGene00019899					WBGene00022675							WBGene00008764			WBGene00001519
WBGene00011299		WBGene00019901					WBGene00022769							WBGene00008819			WBGene00001522
WBGene00011313		WBGene00019917					WBGene00022772							WBGene00008857			WBGene00001523
WBGene00011354		WBGene00019928					WBGene00022785							WBGene00008860			WBGene00001526
WBGene00011355		WBGene00020003					WBGene00022837							WBGene00008878			WBGene00001527
WBGene00011356		WBGene00020012					WBGene00023404							WBGene00008887			WBGene00001552
WBGene00011358		WBGene00020151					WBGene00023450							WBGene00008918			WBGene00001554
WBGene00011359		WBGene00020154					WBGene00043056							WBGene00008925			WBGene00001555
WBGene00011360		WBGene00020220					WBGene00043064							WBGene00008948			WBGene00001556
WBGene00011361		WBGene00020289					WBGene00044071							WBGene00008959			WBGene00001558
WBGene00011372		WBGene00020327					WBGene00044650							WBGene00008973			WBGene00001577
WBGene00011381		WBGene00020328					WBGene00077696							WBGene00009011			WBGene00001579
WBGene00011382		WBGene00020496												WBGene00009013			WBGene00001580
WBGene00011414		WBGene00020587												WBGene00009051			WBGene00001582
WBGene00011469		WBGene00020592												WBGene00009057			WBGene00001585
WBGene00011495		WBGene00020593												WBGene00009078			WBGene00001590
WBGene00011501		WBGene00020594												WBGene00009098			WBGene00001612
WBGene00011503		WBGene00020651												WBGene00009112			WBGene00001613
WBGene00011523		WBGene00020693												WBGene00009118			WBGene00001620
WBGene00011578		WBGene00020800												WBGene00009128			WBGene00001627
WBGene00011606		WBGene00020961												WBGene00009132			WBGene00001628
WBGene00011611		WBGene00021237												WBGene00009139			WBGene00001629
WBGene00011613		WBGene00021238												WBGene00009141			WBGene00001632
WBGene00011621		WBGene00021305												WBGene00009180			WBGene00001635
WBGene00011636		WBGene00021353												WBGene00009186			WBGene00001636
WBGene00011644		WBGene00021372												WBGene00009204			WBGene00001638
WBGene00011650		WBGene00021460												WBGene00009238			WBGene00001639
WBGene00011655		WBGene00021464												WBGene00009256			WBGene00001641
WBGene00011658		WBGene00021535												WBGene00009267			WBGene00001642
WBGene00011659		WBGene00021552												WBGene00009304			WBGene00001645
WBGene00011665		WBGene00021553												WBGene00009307			WBGene00001646
WBGene00011698		WBGene00021594												WBGene00009329			WBGene00001648
WBGene00011699		WBGene00021639												WBGene00009341			WBGene00001650
WBGene00011756		WBGene00021646												WBGene00009353			WBGene00001660
WBGene00011780		WBGene00021647												WBGene00009389			WBGene00001661
WBGene00011781		WBGene00021679												WBGene00009403			WBGene00001662
WBGene00011803		WBGene00021839												WBGene00009441			WBGene00001674
WBGene00011806		WBGene00022030												WBGene00009443			WBGene00001679
WBGene00011829		WBGene00022114												WBGene00009477			WBGene00001680
WBGene00011879		WBGene00022168												WBGene00009507			WBGene00001683
WBGene00011887		WBGene00022250												WBGene00009532			WBGene00001684
WBGene00011890		WBGene00022261												WBGene00009553			WBGene00001685
WBGene00011929		WBGene00022278												WBGene00009565			WBGene00001686
WBGene00011948		WBGene00022286												WBGene00009586			WBGene00001687
WBGene00011949		WBGene00022575												WBGene00009594			WBGene00001708
WBGene00011971		WBGene00022579												WBGene00009627			WBGene00001709
WBGene00012002		WBGene00022592												WBGene00009635			WBGene00001740
WBGene00012040		WBGene00022743												WBGene00009650			WBGene00001744
WBGene00012075		WBGene00022750												WBGene00009665			WBGene00001745
WBGene00012102		WBGene00022835												WBGene00009706			WBGene00001746
WBGene00012121		WBGene00022866												WBGene00009717			WBGene00001747
WBGene00012135		WBGene00022867												WBGene00009731			WBGene00001749
WBGene00012188		WBGene00022868												WBGene00009745			WBGene00001771
WBGene00012222		WBGene00022870												WBGene00009784			WBGene00001790
WBGene00012271		WBGene00022871												WBGene00009800			WBGene00001791
WBGene00012285		WBGene00022872												WBGene00009882			WBGene00001793
WBGene00012293		WBGene00022873												WBGene00009922			WBGene00001794
WBGene00012369		WBGene00023409												WBGene00009930			WBGene00001808
WBGene00012373		WBGene00044286												WBGene00009952			WBGene00001811
WBGene00012393		WBGene00044322												WBGene00009998			WBGene00001813
WBGene00012416		WBGene00044331												WBGene00010002			WBGene00001815
WBGene00012428		WBGene00044332												WBGene00010028			WBGene00001816
WBGene00012457		WBGene00044344												WBGene00010061			WBGene00001823
WBGene00012474		WBGene00044612												WBGene00010075			WBGene00001827
WBGene00012475		WBGene00044790												WBGene00010096			WBGene00001834
WBGene00012532		WBGene00077763												WBGene00010159			WBGene00001840
WBGene00012535														WBGene00010231			WBGene00001843
WBGene00012536														WBGene00010337			WBGene00001844
WBGene00012586														WBGene00010356			WBGene00001853
WBGene00012610														WBGene00010418			WBGene00001854
WBGene00012681														WBGene00010427			WBGene00001855
WBGene00012682														WBGene00010465			WBGene00001856
WBGene00012683														WBGene00010476			WBGene00001857
WBGene00012686														WBGene00010479			WBGene00001860
WBGene00012688														WBGene00010480			WBGene00001863
WBGene00012726														WBGene00010502			WBGene00001872
WBGene00012747														WBGene00010505			WBGene00001876
WBGene00012757														WBGene00010551			WBGene00001877
WBGene00012763														WBGene00010557			WBGene00001878
WBGene00012776														WBGene00010579			WBGene00001880
WBGene00012791														WBGene00010610			WBGene00001881
WBGene00012792														WBGene00010631			WBGene00001882
WBGene00012802														WBGene00010640			WBGene00001883
WBGene00012814														WBGene00010641			WBGene00001885
WBGene00012835														WBGene00010642			WBGene00001886
WBGene00012845														WBGene00010675			WBGene00001887
WBGene00012857														WBGene00010677			WBGene00001889
WBGene00012934														WBGene00010702			WBGene00001890
WBGene00012942														WBGene00010704			WBGene00001891
WBGene00013049														WBGene00010722			WBGene00001893
WBGene00013100														WBGene00010732			WBGene00001894
WBGene00013119														WBGene00010759			WBGene00001895
WBGene00013124														WBGene00010771			WBGene00001896
WBGene00013156														WBGene00010842			WBGene00001898
WBGene00013187														WBGene00010845			WBGene00001899
WBGene00013194														WBGene00010890			WBGene00001901
WBGene00013235														WBGene00010891			WBGene00001903
WBGene00013256														WBGene00010908			WBGene00001904
WBGene00013261														WBGene00010923			WBGene00001906
WBGene00013270														WBGene00010975			WBGene00001907
WBGene00013300														WBGene00010990			WBGene00001908
WBGene00013307														WBGene00011017			WBGene00001909
WBGene00013325														WBGene00011038			WBGene00001915
WBGene00013338														WBGene00011058			WBGene00001916
WBGene00013350														WBGene00011064			WBGene00001917
WBGene00013351														WBGene00011068			WBGene00001918
WBGene00013359														WBGene00011089			WBGene00001919
WBGene00013477														WBGene00011143			WBGene00001921
WBGene00013507														WBGene00011144			WBGene00001922
WBGene00013513														WBGene00011146			WBGene00001923
WBGene00013534														WBGene00011155			WBGene00001925
WBGene00013581														WBGene00011156			WBGene00001926
WBGene00013583														WBGene00011194			WBGene00001927
WBGene00013594														WBGene00011240			WBGene00001928
WBGene00013646														WBGene00011247			WBGene00001929
WBGene00013655														WBGene00011268			WBGene00001931
WBGene00013692														WBGene00011298			WBGene00001932
WBGene00013782														WBGene00011315			WBGene00001933
WBGene00013846														WBGene00011327			WBGene00001935
WBGene00013849														WBGene00011334			WBGene00001936
WBGene00013958														WBGene00011338			WBGene00001937
WBGene00013973														WBGene00011348			WBGene00001939
WBGene00013999														WBGene00011353			WBGene00001940
WBGene00014035														WBGene00011367			WBGene00001942
WBGene00014053														WBGene00011391			WBGene00001959
WBGene00014152														WBGene00011392			WBGene00001973
WBGene00014161														WBGene00011393			WBGene00001974
WBGene00014213														WBGene00011407			WBGene00001978
WBGene00014233														WBGene00011408			WBGene00001979
WBGene00014236														WBGene00011411			WBGene00001983
WBGene00014241														WBGene00011474			WBGene00001993
WBGene00014864														WBGene00011511			WBGene00001999
WBGene00015040														WBGene00011526			WBGene00002000
WBGene00015041														WBGene00011527			WBGene00002001
WBGene00015042														WBGene00011554			WBGene00002003
WBGene00015043														WBGene00011559			WBGene00002005
WBGene00015044														WBGene00011563			WBGene00002007
WBGene00015045														WBGene00011573			WBGene00002008
WBGene00015073														WBGene00011576			WBGene00002010
WBGene00015126														WBGene00011593			WBGene00002025
WBGene00015131														WBGene00011596			WBGene00002028
WBGene00015258														WBGene00011604			WBGene00002029
WBGene00015260														WBGene00011614			WBGene00002031
WBGene00015268														WBGene00011631			WBGene00002035
WBGene00015278														WBGene00011637			WBGene00002036
WBGene00015285														WBGene00011642			WBGene00002038
WBGene00015295														WBGene00011645			WBGene00002039
WBGene00015324														WBGene00011679			WBGene00002040
WBGene00015330														WBGene00011729			WBGene00002041
WBGene00015361														WBGene00011740			WBGene00002042
WBGene00015387														WBGene00011743			WBGene00002043
WBGene00015388														WBGene00011759			WBGene00002044
WBGene00015389														WBGene00011832			WBGene00002045
WBGene00015399														WBGene00011834			WBGene00002047
WBGene00015400														WBGene00011892			WBGene00002061
WBGene00015412														WBGene00011917			WBGene00002062
WBGene00015457														WBGene00011923			WBGene00002064
WBGene00015458														WBGene00011941			WBGene00002065
WBGene00015472														WBGene00011964			WBGene00002070
WBGene00015510														WBGene00011969			WBGene00002071
WBGene00015559														WBGene00012020			WBGene00002074
WBGene00015567														WBGene00012029			WBGene00002075
WBGene00015649														WBGene00012094			WBGene00002076
WBGene00015689														WBGene00012124			WBGene00002077
WBGene00015700														WBGene00012127			WBGene00002078
WBGene00015716														WBGene00012132			WBGene00002080
WBGene00015855														WBGene00012143			WBGene00002081
WBGene00015861														WBGene00012158			WBGene00002083
WBGene00015867														WBGene00012164			WBGene00002146
WBGene00015871														WBGene00012182			WBGene00002147
WBGene00015894														WBGene00012194			WBGene00002152
WBGene00015957														WBGene00012209			WBGene00002153
WBGene00015975														WBGene00012244			WBGene00002162
WBGene00016022														WBGene00012322			WBGene00002169
WBGene00016032														WBGene00012343			WBGene00002178
WBGene00016037														WBGene00012354			WBGene00002181
WBGene00016063														WBGene00012366			WBGene00002182
WBGene00016064														WBGene00012371			WBGene00002183
WBGene00016093														WBGene00012394			WBGene00002184
WBGene00016094														WBGene00012464			WBGene00002185
WBGene00016095														WBGene00012465			WBGene00002189
WBGene00016104														WBGene00012468			WBGene00002190
WBGene00016120														WBGene00012496			WBGene00002191
WBGene00016135														WBGene00012518			WBGene00002192
WBGene00016152														WBGene00012562			WBGene00002196
WBGene00016153														WBGene00012631			WBGene00002201
WBGene00016294														WBGene00012643			WBGene00002202
WBGene00016300														WBGene00012647			WBGene00002203
WBGene00016306														WBGene00012650			WBGene00002207
WBGene00016327														WBGene00012696			WBGene00002213
WBGene00016335														WBGene00012704			WBGene00002215
WBGene00016340														WBGene00012713			WBGene00002217
WBGene00016373														WBGene00012718			WBGene00002219
WBGene00016423														WBGene00012756			WBGene00002222
WBGene00016431														WBGene00012780			WBGene00002223
WBGene00016435														WBGene00012804			WBGene00002228
WBGene00016499														WBGene00012830			WBGene00002229
WBGene00016566														WBGene00012887			WBGene00002230
WBGene00016613														WBGene00012891			WBGene00002233
WBGene00016661														WBGene00012927			WBGene00002235
WBGene00016698														WBGene00012933			WBGene00002238
WBGene00016705														WBGene00012950			WBGene00002243
WBGene00016786														WBGene00012982			WBGene00002245
WBGene00016798														WBGene00012984			WBGene00002247
WBGene00016801														WBGene00012987			WBGene00002249
WBGene00016841														WBGene00013028			WBGene00002251
WBGene00016933														WBGene00013038			WBGene00002257
WBGene00016970														WBGene00013093			WBGene00002258
WBGene00017026														WBGene00013094			WBGene00002261
WBGene00017069														WBGene00013109			WBGene00002262
WBGene00017083														WBGene00013135			WBGene00002264
WBGene00017098														WBGene00013143			WBGene00002280
WBGene00017108														WBGene00013202			WBGene00002297
WBGene00017176														WBGene00013209			WBGene00002324
WBGene00017184														WBGene00013217			WBGene00002335
WBGene00017195														WBGene00013223			WBGene00002348
WBGene00017277														WBGene00013237			WBGene00002363
WBGene00017279														WBGene00013238			WBGene00002497
WBGene00017314														WBGene00013244			WBGene00002632
WBGene00017344														WBGene00013255			WBGene00002637
WBGene00017375														WBGene00013258			WBGene00002694
WBGene00017387														WBGene00013266			WBGene00002696
WBGene00017388														WBGene00013268			WBGene00002717
WBGene00017394														WBGene00013269			WBGene00002845
WBGene00017427														WBGene00013301			WBGene00002855
WBGene00017428														WBGene00013344			WBGene00002879
WBGene00017443														WBGene00013373			WBGene00002889
WBGene00017508														WBGene00013376			WBGene00002957
WBGene00017543														WBGene00013378			WBGene00002978
WBGene00017544														WBGene00013406			WBGene00002980
WBGene00017565														WBGene00013407			WBGene00002985
WBGene00017571														WBGene00013433			WBGene00002988
WBGene00017576														WBGene00013447			WBGene00002989
WBGene00017580														WBGene00013457			WBGene00002991
WBGene00017598														WBGene00013461			WBGene00002996
WBGene00017601														WBGene00013529			WBGene00002998
WBGene00017638														WBGene00013666			WBGene00003000
WBGene00017648														WBGene00013669			WBGene00003007
WBGene00017671														WBGene00013671			WBGene00003009
WBGene00017678														WBGene00013725			WBGene00003014
WBGene00017690														WBGene00013738			WBGene00003017
WBGene00017709														WBGene00013789			WBGene00003020
WBGene00017710														WBGene00013892			WBGene00003024
WBGene00017711														WBGene00013894			WBGene00003025
WBGene00017770														WBGene00013895			WBGene00003026
WBGene00017814														WBGene00013919			WBGene00003030
WBGene00017861														WBGene00013983			WBGene00003036
WBGene00017865														WBGene00013984			WBGene00003041
WBGene00017876														WBGene00013985			WBGene00003043
WBGene00017879														WBGene00013994			WBGene00003047
WBGene00017881														WBGene00013997			WBGene00003048
WBGene00017937														WBGene00014018			WBGene00003052
WBGene00017948														WBGene00014034			WBGene00003059
WBGene00017969														WBGene00014051			WBGene00003061
WBGene00018016														WBGene00014066			WBGene00003062
WBGene00018024														WBGene00014075			WBGene00003063
WBGene00018034														WBGene00014115			WBGene00003064
WBGene00018035														WBGene00014151			WBGene00003071
WBGene00018067														WBGene00014153			WBGene00003073
WBGene00018151														WBGene00014170			WBGene00003074
WBGene00018209														WBGene00014174			WBGene00003076
WBGene00018210														WBGene00014210			WBGene00003077
WBGene00018246														WBGene00014222			WBGene00003078
WBGene00018318														WBGene00014224			WBGene00003079
WBGene00018358														WBGene00014230			WBGene00003080
WBGene00018365														WBGene00014256			WBGene00003081
WBGene00018376														WBGene00015001			WBGene00003082
WBGene00018392														WBGene00015021			WBGene00003085
WBGene00018417														WBGene00015029			WBGene00003086
WBGene00018468														WBGene00015047			WBGene00003112
WBGene00018504														WBGene00015048			WBGene00003119
WBGene00018547														WBGene00015052			WBGene00003123
WBGene00018594														WBGene00015054			WBGene00003129
WBGene00018696														WBGene00015055			WBGene00003136
WBGene00018706														WBGene00015092			WBGene00003143
WBGene00018710														WBGene00015104			WBGene00003148
WBGene00018741														WBGene00015124			WBGene00003150
WBGene00018763														WBGene00015164			WBGene00003153
WBGene00018779														WBGene00015177			WBGene00003154
WBGene00018781														WBGene00015194			WBGene00003156
WBGene00018851														WBGene00015203			WBGene00003157
WBGene00018886														WBGene00015232			WBGene00003158
WBGene00018926														WBGene00015248			WBGene00003159
WBGene00018930														WBGene00015249			WBGene00003161
WBGene00018949														WBGene00015270			WBGene00003162
WBGene00018982														WBGene00015293			WBGene00003164
WBGene00018987														WBGene00015298			WBGene00003175
WBGene00018997														WBGene00015308			WBGene00003177
WBGene00019069														WBGene00015359			WBGene00003182
WBGene00019085														WBGene00015360			WBGene00003185
WBGene00019094														WBGene00015454			WBGene00003186
WBGene00019104														WBGene00015460			WBGene00003214
WBGene00019105														WBGene00015485			WBGene00003232
WBGene00019151														WBGene00015486			WBGene00003243
WBGene00019229														WBGene00015509			WBGene00003246
WBGene00019249														WBGene00015554			WBGene00003247
WBGene00019270														WBGene00015579			WBGene00003253
WBGene00019314														WBGene00015623			WBGene00003254
WBGene00019317														WBGene00015662			WBGene00003368
WBGene00019344														WBGene00015697			WBGene00003375
WBGene00019346														WBGene00015735			WBGene00003378
WBGene00019352														WBGene00015742			WBGene00003389
WBGene00019362														WBGene00015744			WBGene00003390
WBGene00019380														WBGene00015746			WBGene00003391
WBGene00019408														WBGene00015752			WBGene00003392
WBGene00019461														WBGene00015779			WBGene00003393
WBGene00019470														WBGene00015794			WBGene00003400
WBGene00019471														WBGene00015802			WBGene00003401
WBGene00019472														WBGene00015806			WBGene00003405
WBGene00019473														WBGene00015866			WBGene00003407
WBGene00019479														WBGene00015926			WBGene00003408
WBGene00019489														WBGene00015934			WBGene00003411
WBGene00019509														WBGene00016014			WBGene00003415
WBGene00019546														WBGene00016019			WBGene00003417
WBGene00019565														WBGene00016029			WBGene00003421
WBGene00019605														WBGene00016073			WBGene00003422
WBGene00019608														WBGene00016106			WBGene00003423
WBGene00019619														WBGene00016112			WBGene00003475
WBGene00019717														WBGene00016113			WBGene00003477
WBGene00019751														WBGene00016123			WBGene00003478
WBGene00019756														WBGene00016150			WBGene00003514
WBGene00019757														WBGene00016151			WBGene00003515
WBGene00019779														WBGene00016166			WBGene00003517
WBGene00019801														WBGene00016170			WBGene00003519
WBGene00019814														WBGene00016185			WBGene00003555
WBGene00019815														WBGene00016192			WBGene00003558
WBGene00019842														WBGene00016204			WBGene00003561
WBGene00019844														WBGene00016207			WBGene00003563
WBGene00019919														WBGene00016209			WBGene00003567
WBGene00019977														WBGene00016249			WBGene00003569
WBGene00020035														WBGene00016250			WBGene00003572
WBGene00020048														WBGene00016260			WBGene00003576
WBGene00020070														WBGene00016316			WBGene00003579
WBGene00020106														WBGene00016323			WBGene00003580
WBGene00020111														WBGene00016328			WBGene00003581
WBGene00020149														WBGene00016344			WBGene00003583
WBGene00020179														WBGene00016391			WBGene00003584
WBGene00020236														WBGene00016395			WBGene00003586
WBGene00020263														WBGene00016400			WBGene00003587
WBGene00020287														WBGene00016407			WBGene00003589
WBGene00020330														WBGene00016408			WBGene00003596
WBGene00020386														WBGene00016442			WBGene00003622
WBGene00020419														WBGene00016448			WBGene00003654
WBGene00020425														WBGene00016452			WBGene00003731
WBGene00020442														WBGene00016490			WBGene00003733
WBGene00020485														WBGene00016524			WBGene00003735
WBGene00020503														WBGene00016562			WBGene00003736
WBGene00020504														WBGene00016602			WBGene00003774
WBGene00020575														WBGene00016603			WBGene00003775
WBGene00020631														WBGene00016642			WBGene00003778
WBGene00020652														WBGene00016678			WBGene00003787
WBGene00020673														WBGene00016704			WBGene00003788
WBGene00020674														WBGene00016725			WBGene00003789
WBGene00020702														WBGene00016751			WBGene00003794
WBGene00020727														WBGene00016754			WBGene00003798
WBGene00020767														WBGene00016792			WBGene00003799
WBGene00020840														WBGene00016888			WBGene00003800
WBGene00020847														WBGene00016902			WBGene00003803
WBGene00020895														WBGene00016906			WBGene00003804
WBGene00020908														WBGene00016918			WBGene00003806
WBGene00020927														WBGene00016920			WBGene00003815
WBGene00020970														WBGene00016957			WBGene00003816
WBGene00021011														WBGene00016977			WBGene00003818
WBGene00021070														WBGene00016983			WBGene00003821
WBGene00021072														WBGene00016989			WBGene00003826
WBGene00021075														WBGene00017014			WBGene00003829
WBGene00021125														WBGene00017037			WBGene00003831
WBGene00021214														WBGene00017044			WBGene00003834
WBGene00021221														WBGene00017054			WBGene00003858
WBGene00021260														WBGene00017082			WBGene00003870
WBGene00021323														WBGene00017088			WBGene00003876
WBGene00021338														WBGene00017122			WBGene00003877
WBGene00021343														WBGene00017137			WBGene00003882
WBGene00021345														WBGene00017169			WBGene00003883
WBGene00021391														WBGene00017210			WBGene00003884
WBGene00021403														WBGene00017238			WBGene00003885
WBGene00021407														WBGene00017311			WBGene00003886
WBGene00021437														WBGene00017312			WBGene00003892
WBGene00021448														WBGene00017320			WBGene00003893
WBGene00021503														WBGene00017326			WBGene00003898
WBGene00021548														WBGene00017373			WBGene00003901
WBGene00021615														WBGene00017381			WBGene00003904
WBGene00021662														WBGene00017430			WBGene00003905
WBGene00021691														WBGene00017546			WBGene00003906
WBGene00021751														WBGene00017547			WBGene00003907
WBGene00021759														WBGene00017557			WBGene00003911
WBGene00021766														WBGene00017592			WBGene00003914
WBGene00021846														WBGene00017594			WBGene00003916
WBGene00021877														WBGene00017640			WBGene00003919
WBGene00021913														WBGene00017642			WBGene00003920
WBGene00021939														WBGene00017687			WBGene00003921
WBGene00021943														WBGene00017702			WBGene00003922
WBGene00022006														WBGene00017738			WBGene00003923
WBGene00022007														WBGene00017765			WBGene00003924
WBGene00022014														WBGene00017769			WBGene00003925
WBGene00022026														WBGene00017799			WBGene00003926
WBGene00022101														WBGene00017818			WBGene00003927
WBGene00022103														WBGene00017914			WBGene00003928
WBGene00022181														WBGene00017920			WBGene00003929
WBGene00022189														WBGene00017924			WBGene00003930
WBGene00022203														WBGene00017928			WBGene00003931
WBGene00022219														WBGene00017936			WBGene00003932
WBGene00022236														WBGene00017974			WBGene00003947
WBGene00022247														WBGene00017975			WBGene00003949
WBGene00022257														WBGene00017981			WBGene00003950
WBGene00022295														WBGene00017988			WBGene00003951
WBGene00022307														WBGene00017999			WBGene00003952
WBGene00022397														WBGene00018036			WBGene00003954
WBGene00022427														WBGene00018037			WBGene00003961
WBGene00022429														WBGene00018060			WBGene00003963
WBGene00022489														WBGene00018149			WBGene00003964
WBGene00022532														WBGene00018160			WBGene00003965
WBGene00022538														WBGene00018161			WBGene00003966
WBGene00022565														WBGene00018174			WBGene00003967
WBGene00022566														WBGene00018187			WBGene00003969
WBGene00022569														WBGene00018213			WBGene00003970
WBGene00022587														WBGene00018218			WBGene00003975
WBGene00022613														WBGene00018239			WBGene00003978
WBGene00022615														WBGene00018240			WBGene00004014
WBGene00022641														WBGene00018328			WBGene00004015
WBGene00022643														WBGene00018330			WBGene00004016
WBGene00022741														WBGene00018340			WBGene00004025
WBGene00022770														WBGene00018373			WBGene00004028
WBGene00023423														WBGene00018393			WBGene00004032
WBGene00043066														WBGene00018409			WBGene00004033
WBGene00044004														WBGene00018424			WBGene00004034
WBGene00044044														WBGene00018426			WBGene00004035
WBGene00044068														WBGene00018512			WBGene00004036
WBGene00044078														WBGene00018519			WBGene00004038
WBGene00044235														WBGene00018586			WBGene00004039
WBGene00044302														WBGene00018672			WBGene00004040
WBGene00044355														WBGene00018674			WBGene00004042
WBGene00044386														WBGene00018700			WBGene00004043
WBGene00044468														WBGene00018719			WBGene00004045
WBGene00044528														WBGene00018723			WBGene00004046
WBGene00044620														WBGene00018737			WBGene00004047
WBGene00044623														WBGene00018762			WBGene00004049
WBGene00044651														WBGene00018776			WBGene00004055
WBGene00044674														WBGene00018784			WBGene00004058
WBGene00044705														WBGene00018788			WBGene00004059
WBGene00044760														WBGene00018798			WBGene00004060
WBGene00044791														WBGene00018835			WBGene00004061
WBGene00045103														WBGene00018847			WBGene00004063
WBGene00045379														WBGene00018897			WBGene00004064
WBGene00045419														WBGene00018898			WBGene00004075
WBGene00045459														WBGene00018984			WBGene00004085
WBGene00077655														WBGene00018990			WBGene00004087
WBGene00077680														WBGene00018995			WBGene00004088
WBGene00077712														WBGene00019004			WBGene00004089
														WBGene00019068			WBGene00004090
														WBGene00019074			WBGene00004091
														WBGene00019125			WBGene00004092
														WBGene00019126			WBGene00004101
														WBGene00019196			WBGene00004109
														WBGene00019204			WBGene00004121
														WBGene00019219			WBGene00004131
														WBGene00019220			WBGene00004134
														WBGene00019245			WBGene00004136
														WBGene00019257			WBGene00004151
														WBGene00019259			WBGene00004178
														WBGene00019275			WBGene00004179
														WBGene00019277			WBGene00004180
														WBGene00019295			WBGene00004181
														WBGene00019298			WBGene00004183
														WBGene00019347			WBGene00004184
														WBGene00019365			WBGene00004185
														WBGene00019403			WBGene00004186
														WBGene00019424			WBGene00004187
														WBGene00019457			WBGene00004188
														WBGene00019460			WBGene00004190
														WBGene00019481			WBGene00004194
														WBGene00019487			WBGene00004197
														WBGene00019536			WBGene00004198
														WBGene00019537			WBGene00004201
														WBGene00019544			WBGene00004203
														WBGene00019604			WBGene00004204
														WBGene00019620			WBGene00004205
														WBGene00019624			WBGene00004206
														WBGene00019628			WBGene00004207
														WBGene00019658			WBGene00004208
														WBGene00019682			WBGene00004210
														WBGene00019800			WBGene00004213
														WBGene00019806			WBGene00004214
														WBGene00019819			WBGene00004215
														WBGene00019820			WBGene00004248
														WBGene00019832			WBGene00004254
														WBGene00019867			WBGene00004255
														WBGene00019890			WBGene00004256
														WBGene00019962			WBGene00004257
														WBGene00020004			WBGene00004258
														WBGene00020018			WBGene00004259
														WBGene00020088			WBGene00004266
														WBGene00020092			WBGene00004267
														WBGene00020096			WBGene00004268
														WBGene00020097			WBGene00004270
														WBGene00020112			WBGene00004272
														WBGene00020139			WBGene00004273
														WBGene00020146			WBGene00004274
														WBGene00020181			WBGene00004276
														WBGene00020191			WBGene00004277
														WBGene00020235			WBGene00004278
														WBGene00020246			WBGene00004279
														WBGene00020251			WBGene00004281
														WBGene00020254			WBGene00004282
														WBGene00020266			WBGene00004283
														WBGene00020281			WBGene00004285
														WBGene00020322			WBGene00004286
														WBGene00020334			WBGene00004287
														WBGene00020374			WBGene00004297
														WBGene00020382			WBGene00004298
														WBGene00020402			WBGene00004302
														WBGene00020446			WBGene00004304
														WBGene00020490			WBGene00004305
														WBGene00020601			WBGene00004307
														WBGene00020604			WBGene00004308
														WBGene00020612			WBGene00004310
														WBGene00020613			WBGene00004311
														WBGene00020625			WBGene00004314
														WBGene00020658			WBGene00004315
														WBGene00020683			WBGene00004319
														WBGene00020742			WBGene00004320
														WBGene00020757			WBGene00004321
														WBGene00020782			WBGene00004322
														WBGene00020810			WBGene00004337
														WBGene00020820			WBGene00004338
														WBGene00020821			WBGene00004339
														WBGene00020825			WBGene00004341
														WBGene00020837			WBGene00004344
														WBGene00020838			WBGene00004345
														WBGene00020839			WBGene00004348
														WBGene00020868			WBGene00004355
														WBGene00020924			WBGene00004356
														WBGene00020933			WBGene00004357
														WBGene00020937			WBGene00004358
														WBGene00020953			WBGene00004361
														WBGene00020964			WBGene00004367
														WBGene00021009			WBGene00004368
														WBGene00021058			WBGene00004371
														WBGene00021059			WBGene00004373
														WBGene00021061			WBGene00004377
														WBGene00021088			WBGene00004378
														WBGene00021128			WBGene00004381
														WBGene00021132			WBGene00004383
														WBGene00021133			WBGene00004385
														WBGene00021159			WBGene00004386
														WBGene00021176			WBGene00004387
														WBGene00021276			WBGene00004388
														WBGene00021311			WBGene00004389
														WBGene00021327			WBGene00004390
														WBGene00021331			WBGene00004391
														WBGene00021346			WBGene00004393
														WBGene00021349			WBGene00004400
														WBGene00021354			WBGene00004402
														WBGene00021363			WBGene00004405
														WBGene00021427			WBGene00004408
														WBGene00021466			WBGene00004409
														WBGene00021474			WBGene00004411
														WBGene00021475			WBGene00004412
														WBGene00021482			WBGene00004413
														WBGene00021487			WBGene00004414
														WBGene00021491			WBGene00004415
														WBGene00021492			WBGene00004416
														WBGene00021494			WBGene00004417
														WBGene00021536			WBGene00004418
														WBGene00021551			WBGene00004419
														WBGene00021733			WBGene00004420
														WBGene00021789			WBGene00004421
														WBGene00021813			WBGene00004422
														WBGene00021814			WBGene00004423
														WBGene00021815			WBGene00004425
														WBGene00021816			WBGene00004426
														WBGene00021829			WBGene00004427
														WBGene00021831			WBGene00004428
														WBGene00021842			WBGene00004429
														WBGene00021867			WBGene00004430
														WBGene00021870			WBGene00004431
														WBGene00021882			WBGene00004432
														WBGene00021893			WBGene00004433
														WBGene00021901			WBGene00004434
														WBGene00021902			WBGene00004435
														WBGene00021904			WBGene00004436
														WBGene00021929			WBGene00004437
														WBGene00021932			WBGene00004438
														WBGene00021960			WBGene00004439
														WBGene00022019			WBGene00004440
														WBGene00022043			WBGene00004441
														WBGene00022045			WBGene00004444
														WBGene00022092			WBGene00004445
														WBGene00022128			WBGene00004446
														WBGene00022130			WBGene00004447
														WBGene00022141			WBGene00004448
														WBGene00022167			WBGene00004449
														WBGene00022172			WBGene00004451
														WBGene00022175			WBGene00004452
														WBGene00022188			WBGene00004454
														WBGene00022192			WBGene00004456
														WBGene00022199			WBGene00004457
														WBGene00022251			WBGene00004458
														WBGene00022271			WBGene00004460
														WBGene00022273			WBGene00004461
														WBGene00022296			WBGene00004462
														WBGene00022361			WBGene00004463
														WBGene00022401			WBGene00004464
														WBGene00022402			WBGene00004465
														WBGene00022420			WBGene00004466
														WBGene00022456			WBGene00004467
														WBGene00022460			WBGene00004468
														WBGene00022463			WBGene00004470
														WBGene00022465			WBGene00004471
														WBGene00022498			WBGene00004472
														WBGene00022518			WBGene00004473
														WBGene00022531			WBGene00004474
														WBGene00022599			WBGene00004475
														WBGene00022610			WBGene00004476
														WBGene00022616			WBGene00004477
														WBGene00022673			WBGene00004478
														WBGene00022694			WBGene00004479
														WBGene00022727			WBGene00004480
														WBGene00022733			WBGene00004481
														WBGene00022792			WBGene00004482
														WBGene00022832			WBGene00004483
														WBGene00022836			WBGene00004484
														WBGene00022851			WBGene00004485
														WBGene00023422			WBGene00004486
														WBGene00044325			WBGene00004487
														WBGene00044423			WBGene00004488
														WBGene00044440			WBGene00004489
														WBGene00044604			WBGene00004491
														WBGene00044609			WBGene00004492
														WBGene00044614			WBGene00004494
														WBGene00044689			WBGene00004495
														WBGene00044734			WBGene00004496
														WBGene00044924			WBGene00004498
														WBGene00044989			WBGene00004501
														WBGene00077500			WBGene00004502
														WBGene00077521			WBGene00004503
														WBGene00077771			WBGene00004504
														WBGene00086566			WBGene00004505
																	WBGene00004506
																	WBGene00004507
																	WBGene00004679
																	WBGene00004682
																	WBGene00004700
																	WBGene00004703
																	WBGene00004704
																	WBGene00004705
																	WBGene00004706
																	WBGene00004727
																	WBGene00004728
																	WBGene00004729
																	WBGene00004735
																	WBGene00004736
																	WBGene00004738
																	WBGene00004740
																	WBGene00004743
																	WBGene00004744
																	WBGene00004752
																	WBGene00004753
																	WBGene00004754
																	WBGene00004755
																	WBGene00004756
																	WBGene00004758
																	WBGene00004759
																	WBGene00004760
																	WBGene00004766
																	WBGene00004767
																	WBGene00004769
																	WBGene00004774
																	WBGene00004777
																	WBGene00004781
																	WBGene00004782
																	WBGene00004787
																	WBGene00004788
																	WBGene00004789
																	WBGene00004790
																	WBGene00004800
																	WBGene00004801
																	WBGene00004802
																	WBGene00004806
																	WBGene00004807
																	WBGene00004808
																	WBGene00004829
																	WBGene00004830
																	WBGene00004831
																	WBGene00004854
																	WBGene00004855
																	WBGene00004856
																	WBGene00004873
																	WBGene00004875
																	WBGene00004878
																	WBGene00004880
																	WBGene00004882
																	WBGene00004888
																	WBGene00004891
																	WBGene00004892
																	WBGene00004895
																	WBGene00004896
																	WBGene00004897
																	WBGene00004910
																	WBGene00004912
																	WBGene00004913
																	WBGene00004914
																	WBGene00004916
																	WBGene00004917
																	WBGene00004918
																	WBGene00004919
																	WBGene00004920
																	WBGene00004921
																	WBGene00004927
																	WBGene00004929
																	WBGene00004930
																	WBGene00004931
																	WBGene00004932
																	WBGene00004947
																	WBGene00004951
																	WBGene00004959
																	WBGene00004969
																	WBGene00004975
																	WBGene00004980
																	WBGene00005007
																	WBGene00005014
																	WBGene00005015
																	WBGene00005019
																	WBGene00005020
																	WBGene00005021
																	WBGene00005022
																	WBGene00005023
																	WBGene00005025
																	WBGene00005026
																	WBGene00005077
																	WBGene00005078
																	WBGene00005662
																	WBGene00005663
																	WBGene00006059
																	WBGene00006061
																	WBGene00006062
																	WBGene00006307
																	WBGene00006308
																	WBGene00006309
																	WBGene00006318
																	WBGene00006321
																	WBGene00006349
																	WBGene00006351
																	WBGene00006352
																	WBGene00006359
																	WBGene00006364
																	WBGene00006367
																	WBGene00006368
																	WBGene00006369
																	WBGene00006373
																	WBGene00006382
																	WBGene00006383
																	WBGene00006386
																	WBGene00006387
																	WBGene00006388
																	WBGene00006389
																	WBGene00006397
																	WBGene00006405
																	WBGene00006410
																	WBGene00006414
																	WBGene00006415
																	WBGene00006416
																	WBGene00006424
																	WBGene00006432
																	WBGene00006433
																	WBGene00006434
																	WBGene00006437
																	WBGene00006439
																	WBGene00006442
																	WBGene00006443
																	WBGene00006446
																	WBGene00006447
																	WBGene00006448
																	WBGene00006461
																	WBGene00006465
																	WBGene00006467
																	WBGene00006470
																	WBGene00006472
																	WBGene00006473
																	WBGene00006474
																	WBGene00006477
																	WBGene00006478
																	WBGene00006479
																	WBGene00006481
																	WBGene00006483
																	WBGene00006490
																	WBGene00006491
																	WBGene00006493
																	WBGene00006494
																	WBGene00006497
																	WBGene00006503
																	WBGene00006510
																	WBGene00006512
																	WBGene00006515
																	WBGene00006518
																	WBGene00006520
																	WBGene00006525
																	WBGene00006526
																	WBGene00006527
																	WBGene00006538
																	WBGene00006542
																	WBGene00006543
																	WBGene00006563
																	WBGene00006565
																	WBGene00006566
																	WBGene00006567
																	WBGene00006568
																	WBGene00006573
																	WBGene00006575
																	WBGene00006578
																	WBGene00006579
																	WBGene00006590
																	WBGene00006594
																	WBGene00006595
																	WBGene00006596
																	WBGene00006598
																	WBGene00006599
																	WBGene00006606
																	WBGene00006607
																	WBGene00006612
																	WBGene00006613
																	WBGene00006615
																	WBGene00006617
																	WBGene00006626
																	WBGene00006633
																	WBGene00006634
																	WBGene00006638
																	WBGene00006647
																	WBGene00006648
																	WBGene00006654
																	WBGene00006655
																	WBGene00006669
																	WBGene00006696
																	WBGene00006697
																	WBGene00006698
																	WBGene00006699
																	WBGene00006700
																	WBGene00006701
																	WBGene00006702
																	WBGene00006703
																	WBGene00006707
																	WBGene00006708
																	WBGene00006709
																	WBGene00006711
																	WBGene00006713
																	WBGene00006715
																	WBGene00006720
																	WBGene00006724
																	WBGene00006728
																	WBGene00006729
																	WBGene00006730
																	WBGene00006733
																	WBGene00006734
																	WBGene00006742
																	WBGene00006743
																	WBGene00006745
																	WBGene00006746
																	WBGene00006750
																	WBGene00006751
																	WBGene00006755
																	WBGene00006756
																	WBGene00006757
																	WBGene00006761
																	WBGene00006762
																	WBGene00006763
																	WBGene00006766
																	WBGene00006767
																	WBGene00006768
																	WBGene00006771
																	WBGene00006772
																	WBGene00006776
																	WBGene00006780
																	WBGene00006781
																	WBGene00006783
																	WBGene00006785
																	WBGene00006786
																	WBGene00006787
																	WBGene00006788
																	WBGene00006789
																	WBGene00006790
																	WBGene00006793
																	WBGene00006795
																	WBGene00006796
																	WBGene00006798
																	WBGene00006803
																	WBGene00006805
																	WBGene00006807
																	WBGene00006808
																	WBGene00006809
																	WBGene00006810
																	WBGene00006817
																	WBGene00006818
																	WBGene00006822
																	WBGene00006823
																	WBGene00006826
																	WBGene00006829
																	WBGene00006830
																	WBGene00006831
																	WBGene00006833
																	WBGene00006836
																	WBGene00006839
																	WBGene00006840
																	WBGene00006843
																	WBGene00006853
																	WBGene00006856
																	WBGene00006862
																	WBGene00006863
																	WBGene00006870
																	WBGene00006876
																	WBGene00006887
																	WBGene00006889
																	WBGene00006890
																	WBGene00006910
																	WBGene00006913
																	WBGene00006917
																	WBGene00006918
																	WBGene00006919
																	WBGene00006921
																	WBGene00006923
																	WBGene00006931
																	WBGene00006932
																	WBGene00006933
																	WBGene00006934
																	WBGene00006936
																	WBGene00006937
																	WBGene00006944
																	WBGene00006945
																	WBGene00006946
																	WBGene00006957
																	WBGene00006958
																	WBGene00006960
																	WBGene00006963
																	WBGene00006964
																	WBGene00006968
																	WBGene00006974
																	WBGene00006987
																	WBGene00006993
																	WBGene00006994
																	WBGene00006996
																	WBGene00006997
																	WBGene00007000
																	WBGene00007007
																	WBGene00007008
																	WBGene00007009
																	WBGene00007010
																	WBGene00007013
																	WBGene00007014
																	WBGene00007018
																	WBGene00007020
																	WBGene00007021
																	WBGene00007026
																	WBGene00007028
																	WBGene00007029
																	WBGene00007030
																	WBGene00007036
																	WBGene00007042
																	WBGene00007045
																	WBGene00007048
																	WBGene00007050
																	WBGene00007053
																	WBGene00007054
																	WBGene00007055
																	WBGene00007056
																	WBGene00007057
																	WBGene00007059
																	WBGene00007099
																	WBGene00007102
																	WBGene00007103
																	WBGene00007105
																	WBGene00007106
																	WBGene00007110
																	WBGene00007111
																	WBGene00007114
																	WBGene00007117
																	WBGene00007122
																	WBGene00007128
																	WBGene00007129
																	WBGene00007135
																	WBGene00007137
																	WBGene00007143
																	WBGene00007144
																	WBGene00007145
																	WBGene00007150
																	WBGene00007167
																	WBGene00007174
																	WBGene00007175
																	WBGene00007184
																	WBGene00007188
																	WBGene00007189
																	WBGene00007194
																	WBGene00007197
																	WBGene00007201
																	WBGene00007210
																	WBGene00007216
																	WBGene00007217
																	WBGene00007226
																	WBGene00007234
																	WBGene00007235
																	WBGene00007236
																	WBGene00007237
																	WBGene00007256
																	WBGene00007267
																	WBGene00007277
																	WBGene00007287
																	WBGene00007302
																	WBGene00007330
																	WBGene00007350
																	WBGene00007352
																	WBGene00007355
																	WBGene00007387
																	WBGene00007388
																	WBGene00007400
																	WBGene00007409
																	WBGene00007412
																	WBGene00007413
																	WBGene00007419
																	WBGene00007428
																	WBGene00007429
																	WBGene00007435
																	WBGene00007438
																	WBGene00007444
																	WBGene00007446
																	WBGene00007463
																	WBGene00007500
																	WBGene00007505
																	WBGene00007514
																	WBGene00007528
																	WBGene00007531
																	WBGene00007534
																	WBGene00007548
																	WBGene00007549
																	WBGene00007554
																	WBGene00007555
																	WBGene00007556
																	WBGene00007561
																	WBGene00007564
																	WBGene00007576
																	WBGene00007581
																	WBGene00007593
																	WBGene00007595
																	WBGene00007606
																	WBGene00007617
																	WBGene00007620
																	WBGene00007621
																	WBGene00007622
																	WBGene00007623
																	WBGene00007626
																	WBGene00007627
																	WBGene00007628
																	WBGene00007630
																	WBGene00007646
																	WBGene00007664
																	WBGene00007666
																	WBGene00007683
																	WBGene00007686
																	WBGene00007694
																	WBGene00007696
																	WBGene00007703
																	WBGene00007705
																	WBGene00007706
																	WBGene00007707
																	WBGene00007712
																	WBGene00007718
																	WBGene00007730
																	WBGene00007753
																	WBGene00007755
																	WBGene00007787
																	WBGene00007799
																	WBGene00007801
																	WBGene00007812
																	WBGene00007836
																	WBGene00007857
																	WBGene00007860
																	WBGene00007878
																	WBGene00007882
																	WBGene00007886
																	WBGene00007912
																	WBGene00007917
																	WBGene00007918
																	WBGene00007922
																	WBGene00007924
																	WBGene00007927
																	WBGene00007941
																	WBGene00007942
																	WBGene00007952
																	WBGene00007953
																	WBGene00007959
																	WBGene00007969
																	WBGene00007971
																	WBGene00007972
																	WBGene00007974
																	WBGene00007980
																	WBGene00007982
																	WBGene00007983
																	WBGene00007993
																	WBGene00008006
																	WBGene00008019
																	WBGene00008033
																	WBGene00008041
																	WBGene00008052
																	WBGene00008053
																	WBGene00008078
																	WBGene00008117
																	WBGene00008119
																	WBGene00008121
																	WBGene00008122
																	WBGene00008131
																	WBGene00008132
																	WBGene00008133
																	WBGene00008136
																	WBGene00008143
																	WBGene00008151
																	WBGene00008164
																	WBGene00008165
																	WBGene00008167
																	WBGene00008205
																	WBGene00008218
																	WBGene00008225
																	WBGene00008236
																	WBGene00008237
																	WBGene00008239
																	WBGene00008258
																	WBGene00008263
																	WBGene00008273
																	WBGene00008288
																	WBGene00008311
																	WBGene00008320
																	WBGene00008331
																	WBGene00008338
																	WBGene00008339
																	WBGene00008345
																	WBGene00008354
																	WBGene00008362
																	WBGene00008364
																	WBGene00008366
																	WBGene00008370
																	WBGene00008371
																	WBGene00008379
																	WBGene00008380
																	WBGene00008386
																	WBGene00008398
																	WBGene00008402
																	WBGene00008405
																	WBGene00008408
																	WBGene00008410
																	WBGene00008411
																	WBGene00008414
																	WBGene00008415
																	WBGene00008422
																	WBGene00008425
																	WBGene00008431
																	WBGene00008439
																	WBGene00008452
																	WBGene00008455
																	WBGene00008456
																	WBGene00008480
																	WBGene00008502
																	WBGene00008505
																	WBGene00008514
																	WBGene00008531
																	WBGene00008532
																	WBGene00008538
																	WBGene00008546
																	WBGene00008564
																	WBGene00008566
																	WBGene00008567
																	WBGene00008570
																	WBGene00008571
																	WBGene00008585
																	WBGene00008586
																	WBGene00008606
																	WBGene00008639
																	WBGene00008641
																	WBGene00008642
																	WBGene00008643
																	WBGene00008645
																	WBGene00008646
																	WBGene00008654
																	WBGene00008664
																	WBGene00008666
																	WBGene00008670
																	WBGene00008682
																	WBGene00008684
																	WBGene00008685
																	WBGene00008686
																	WBGene00008687
																	WBGene00008688
																	WBGene00008693
																	WBGene00008706
																	WBGene00008729
																	WBGene00008733
																	WBGene00008741
																	WBGene00008765
																	WBGene00008766
																	WBGene00008767
																	WBGene00008769
																	WBGene00008774
																	WBGene00008775
																	WBGene00008781
																	WBGene00008800
																	WBGene00008806
																	WBGene00008809
																	WBGene00008810
																	WBGene00008852
																	WBGene00008856
																	WBGene00008876
																	WBGene00008877
																	WBGene00008919
																	WBGene00008920
																	WBGene00008921
																	WBGene00008924
																	WBGene00008927
																	WBGene00008939
																	WBGene00008956
																	WBGene00008974
																	WBGene00008979
																	WBGene00008992
																	WBGene00008999
																	WBGene00009002
																	WBGene00009004
																	WBGene00009006
																	WBGene00009007
																	WBGene00009010
																	WBGene00009012
																	WBGene00009023
																	WBGene00009035
																	WBGene00009045
																	WBGene00009048
																	WBGene00009049
																	WBGene00009050
																	WBGene00009065
																	WBGene00009082
																	WBGene00009084
																	WBGene00009092
																	WBGene00009100
																	WBGene00009103
																	WBGene00009116
																	WBGene00009119
																	WBGene00009120
																	WBGene00009122
																	WBGene00009123
																	WBGene00009124
																	WBGene00009131
																	WBGene00009138
																	WBGene00009140
																	WBGene00009145
																	WBGene00009155
																	WBGene00009158
																	WBGene00009163
																	WBGene00009164
																	WBGene00009172
																	WBGene00009174
																	WBGene00009176
																	WBGene00009177
																	WBGene00009187
																	WBGene00009189
																	WBGene00009191
																	WBGene00009200
																	WBGene00009201
																	WBGene00009207
																	WBGene00009211
																	WBGene00009218
																	WBGene00009232
																	WBGene00009246
																	WBGene00009258
																	WBGene00009260
																	WBGene00009262
																	WBGene00009264
																	WBGene00009266
																	WBGene00009277
																	WBGene00009285
																	WBGene00009287
																	WBGene00009289
																	WBGene00009290
																	WBGene00009305
																	WBGene00009319
																	WBGene00009320
																	WBGene00009322
																	WBGene00009334
																	WBGene00009335
																	WBGene00009336
																	WBGene00009342
																	WBGene00009352
																	WBGene00009354
																	WBGene00009366
																	WBGene00009367
																	WBGene00009368
																	WBGene00009369
																	WBGene00009372
																	WBGene00009436
																	WBGene00009439
																	WBGene00009440
																	WBGene00009452
																	WBGene00009460
																	WBGene00009478
																	WBGene00009479
																	WBGene00009498
																	WBGene00009503
																	WBGene00009514
																	WBGene00009521
																	WBGene00009531
																	WBGene00009542
																	WBGene00009552
																	WBGene00009554
																	WBGene00009557
																	WBGene00009559
																	WBGene00009563
																	WBGene00009574
																	WBGene00009575
																	WBGene00009580
																	WBGene00009583
																	WBGene00009617
																	WBGene00009618
																	WBGene00009619
																	WBGene00009628
																	WBGene00009632
																	WBGene00009647
																	WBGene00009658
																	WBGene00009664
																	WBGene00009666
																	WBGene00009668
																	WBGene00009671
																	WBGene00009672
																	WBGene00009674
																	WBGene00009681
																	WBGene00009686
																	WBGene00009711
																	WBGene00009726
																	WBGene00009732
																	WBGene00009734
																	WBGene00009736
																	WBGene00009738
																	WBGene00009769
																	WBGene00009771
																	WBGene00009772
																	WBGene00009776
																	WBGene00009783
																	WBGene00009811
																	WBGene00009812
																	WBGene00009813
																	WBGene00009829
																	WBGene00009867
																	WBGene00009885
																	WBGene00009902
																	WBGene00009903
																	WBGene00009908
																	WBGene00009918
																	WBGene00009919
																	WBGene00009920
																	WBGene00009925
																	WBGene00009944
																	WBGene00009947
																	WBGene00009966
																	WBGene00009973
																	WBGene00009976
																	WBGene00009978
																	WBGene00009987
																	WBGene00009992
																	WBGene00009996
																	WBGene00010015
																	WBGene00010035
																	WBGene00010038
																	WBGene00010040
																	WBGene00010042
																	WBGene00010044
																	WBGene00010052
																	WBGene00010054
																	WBGene00010055
																	WBGene00010056
																	WBGene00010083
																	WBGene00010089
																	WBGene00010094
																	WBGene00010097
																	WBGene00010111
																	WBGene00010115
																	WBGene00010117
																	WBGene00010130
																	WBGene00010131
																	WBGene00010138
																	WBGene00010160
																	WBGene00010166
																	WBGene00010178
																	WBGene00010197
																	WBGene00010214
																	WBGene00010232
																	WBGene00010233
																	WBGene00010260
																	WBGene00010272
																	WBGene00010279
																	WBGene00010283
																	WBGene00010284
																	WBGene00010303
																	WBGene00010304
																	WBGene00010308
																	WBGene00010317
																	WBGene00010325
																	WBGene00010326
																	WBGene00010333
																	WBGene00010336
																	WBGene00010354
																	WBGene00010369
																	WBGene00010374
																	WBGene00010386
																	WBGene00010397
																	WBGene00010405
																	WBGene00010406
																	WBGene00010408
																	WBGene00010419
																	WBGene00010420
																	WBGene00010425
																	WBGene00010428
																	WBGene00010435
																	WBGene00010436
																	WBGene00010437
																	WBGene00010444
																	WBGene00010450
																	WBGene00010459
																	WBGene00010478
																	WBGene00010481
																	WBGene00010484
																	WBGene00010485
																	WBGene00010496
																	WBGene00010500
																	WBGene00010537
																	WBGene00010540
																	WBGene00010556
																	WBGene00010560
																	WBGene00010564
																	WBGene00010565
																	WBGene00010589
																	WBGene00010595
																	WBGene00010615
																	WBGene00010620
																	WBGene00010622
																	WBGene00010627
																	WBGene00010628
																	WBGene00010629
																	WBGene00010639
																	WBGene00010664
																	WBGene00010665
																	WBGene00010670
																	WBGene00010676
																	WBGene00010685
																	WBGene00010697
																	WBGene00010699
																	WBGene00010701
																	WBGene00010703
																	WBGene00010713
																	WBGene00010720
																	WBGene00010721
																	WBGene00010725
																	WBGene00010734
																	WBGene00010736
																	WBGene00010757
																	WBGene00010758
																	WBGene00010769
																	WBGene00010776
																	WBGene00010778
																	WBGene00010780
																	WBGene00010788
																	WBGene00010789
																	WBGene00010794
																	WBGene00010805
																	WBGene00010809
																	WBGene00010810
																	WBGene00010811
																	WBGene00010813
																	WBGene00010815
																	WBGene00010838
																	WBGene00010839
																	WBGene00010844
																	WBGene00010846
																	WBGene00010847
																	WBGene00010872
																	WBGene00010882
																	WBGene00010889
																	WBGene00010892
																	WBGene00010896
																	WBGene00010898
																	WBGene00010911
																	WBGene00010912
																	WBGene00010924
																	WBGene00010925
																	WBGene00010941
																	WBGene00010974
																	WBGene00010983
																	WBGene00010984
																	WBGene00010988
																	WBGene00011003
																	WBGene00011004
																	WBGene00011029
																	WBGene00011032
																	WBGene00011033
																	WBGene00011040
																	WBGene00011043
																	WBGene00011045
																	WBGene00011050
																	WBGene00011051
																	WBGene00011065
																	WBGene00011071
																	WBGene00011083
																	WBGene00011095
																	WBGene00011106
																	WBGene00011109
																	WBGene00011110
																	WBGene00011111
																	WBGene00011116
																	WBGene00011119
																	WBGene00011122
																	WBGene00011128
																	WBGene00011142
																	WBGene00011147
																	WBGene00011201
																	WBGene00011216
																	WBGene00011224
																	WBGene00011226
																	WBGene00011232
																	WBGene00011237
																	WBGene00011239
																	WBGene00011250
																	WBGene00011253
																	WBGene00011261
																	WBGene00011271
																	WBGene00011272
																	WBGene00011274
																	WBGene00011275
																	WBGene00011280
																	WBGene00011281
																	WBGene00011302
																	WBGene00011303
																	WBGene00011304
																	WBGene00011305
																	WBGene00011306
																	WBGene00011307
																	WBGene00011308
																	WBGene00011311
																	WBGene00011329
																	WBGene00011344
																	WBGene00011352
																	WBGene00011368
																	WBGene00011398
																	WBGene00011399
																	WBGene00011409
																	WBGene00011412
																	WBGene00011417
																	WBGene00011420
																	WBGene00011433
																	WBGene00011440
																	WBGene00011449
																	WBGene00011451
																	WBGene00011462
																	WBGene00011467
																	WBGene00011480
																	WBGene00011481
																	WBGene00011482
																	WBGene00011488
																	WBGene00011493
																	WBGene00011500
																	WBGene00011502
																	WBGene00011507
																	WBGene00011510
																	WBGene00011517
																	WBGene00011524
																	WBGene00011529
																	WBGene00011538
																	WBGene00011543
																	WBGene00011579
																	WBGene00011582
																	WBGene00011590
																	WBGene00011605
																	WBGene00011612
																	WBGene00011625
																	WBGene00011629
																	WBGene00011638
																	WBGene00011648
																	WBGene00011662
																	WBGene00011671
																	WBGene00011672
																	WBGene00011674
																	WBGene00011675
																	WBGene00011677
																	WBGene00011687
																	WBGene00011696
																	WBGene00011697
																	WBGene00011717
																	WBGene00011718
																	WBGene00011719
																	WBGene00011722
																	WBGene00011731
[truncated: 1,388 more rows]

## Sheet: C) Updated OrthoList 1.0 
OrthoList 1.0 (7569)			Uniques (1,650)	Two (1,009)	Three (1,523)	Four (3,387)
WBGene00000001			WBGene00000037	WBGene00000023	WBGene00000003	WBGene00000001
WBGene00000002			WBGene00000038	WBGene00000036	WBGene00000018	WBGene00000002
WBGene00000003			WBGene00000042	WBGene00000055	WBGene00000058	WBGene00000004
WBGene00000004			WBGene00000043	WBGene00000093	WBGene00000067	WBGene00000020
WBGene00000018			WBGene00000044	WBGene00000105	WBGene00000069	WBGene00000022
WBGene00000020			WBGene00000046	WBGene00000121	WBGene00000071	WBGene00000035
WBGene00000022			WBGene00000048	WBGene00000122	WBGene00000090	WBGene00000039
WBGene00000023			WBGene00000049	WBGene00000139	WBGene00000096	WBGene00000040
WBGene00000035			WBGene00000050	WBGene00000145	WBGene00000106	WBGene00000041
WBGene00000036			WBGene00000053	WBGene00000169	WBGene00000118	WBGene00000060
WBGene00000037			WBGene00000054	WBGene00000173	WBGene00000143	WBGene00000063
WBGene00000038			WBGene00000056	WBGene00000176	WBGene00000150	WBGene00000064
WBGene00000039			WBGene00000057	WBGene00000177	WBGene00000163	WBGene00000065
WBGene00000040			WBGene00000059	WBGene00000190	WBGene00000180	WBGene00000066
WBGene00000041			WBGene00000061	WBGene00000202	WBGene00000200	WBGene00000068
WBGene00000042			WBGene00000062	WBGene00000226	WBGene00000204	WBGene00000072
WBGene00000043			WBGene00000070	WBGene00000241	WBGene00000205	WBGene00000074
WBGene00000044			WBGene00000073	WBGene00000249	WBGene00000206	WBGene00000075
WBGene00000046			WBGene00000098	WBGene00000259	WBGene00000207	WBGene00000080
WBGene00000048			WBGene00000100	WBGene00000262	WBGene00000209	WBGene00000081
WBGene00000049			WBGene00000120	WBGene00000265	WBGene00000210	WBGene00000086
WBGene00000050			WBGene00000144	WBGene00000274	WBGene00000211	WBGene00000089
WBGene00000053			WBGene00000146	WBGene00000282	WBGene00000213	WBGene00000092
WBGene00000054			WBGene00000156	WBGene00000296	WBGene00000222	WBGene00000095
WBGene00000055			WBGene00000178	WBGene00000373	WBGene00000227	WBGene00000097
WBGene00000056			WBGene00000196	WBGene00000386	WBGene00000231	WBGene00000099
WBGene00000057			WBGene00000214	WBGene00000396	WBGene00000232	WBGene00000101
WBGene00000058			WBGene00000215	WBGene00000411	WBGene00000233	WBGene00000102
WBGene00000059			WBGene00000216	WBGene00000414	WBGene00000236	WBGene00000103
WBGene00000060			WBGene00000218	WBGene00000421	WBGene00000246	WBGene00000107
WBGene00000061			WBGene00000219	WBGene00000429	WBGene00000248	WBGene00000108
WBGene00000062			WBGene00000220	WBGene00000430	WBGene00000254	WBGene00000109
WBGene00000063			WBGene00000223	WBGene00000433	WBGene00000269	WBGene00000110
WBGene00000064			WBGene00000238	WBGene00000441	WBGene00000270	WBGene00000111
WBGene00000065			WBGene00000250	WBGene00000448	WBGene00000277	WBGene00000112
WBGene00000066			WBGene00000251	WBGene00000449	WBGene00000279	WBGene00000113
WBGene00000067			WBGene00000252	WBGene00000453	WBGene00000281	WBGene00000114
WBGene00000068			WBGene00000256	WBGene00000458	WBGene00000289	WBGene00000115
WBGene00000069			WBGene00000267	WBGene00000468	WBGene00000301	WBGene00000116
WBGene00000070			WBGene00000275	WBGene00000469	WBGene00000367	WBGene00000117
WBGene00000071			WBGene00000389	WBGene00000472	WBGene00000371	WBGene00000123
WBGene00000072			WBGene00000399	WBGene00000473	WBGene00000382	WBGene00000137
WBGene00000073			WBGene00000412	WBGene00000474	WBGene00000387	WBGene00000140
WBGene00000074			WBGene00000425	WBGene00000475	WBGene00000388	WBGene00000142
WBGene00000075			WBGene00000432	WBGene00000483	WBGene00000391	WBGene00000147
WBGene00000080			WBGene00000436	WBGene00000521	WBGene00000392	WBGene00000148
WBGene00000081			WBGene00000440	WBGene00000527	WBGene00000397	WBGene00000149
WBGene00000086			WBGene00000446	WBGene00000528	WBGene00000406	WBGene00000155
WBGene00000089			WBGene00000450	WBGene00000529	WBGene00000413	WBGene00000157
WBGene00000090			WBGene00000457	WBGene00000534	WBGene00000415	WBGene00000158
WBGene00000092			WBGene00000461	WBGene00000535	WBGene00000420	WBGene00000159
WBGene00000093			WBGene00000477	WBGene00000537	WBGene00000424	WBGene00000160
WBGene00000095			WBGene00000487	WBGene00000551	WBGene00000428	WBGene00000161
WBGene00000096			WBGene00000509	WBGene00000564	WBGene00000431	WBGene00000162
WBGene00000097			WBGene00000511	WBGene00000584	WBGene00000438	WBGene00000164
WBGene00000098			WBGene00000512	WBGene00000674	WBGene00000439	WBGene00000165
WBGene00000099			WBGene00000513	WBGene00000708	WBGene00000445	WBGene00000166
WBGene00000100			WBGene00000514	WBGene00000771	WBGene00000447	WBGene00000170
WBGene00000101			WBGene00000517	WBGene00000772	WBGene00000454	WBGene00000171
WBGene00000102			WBGene00000548	WBGene00000782	WBGene00000463	WBGene00000172
WBGene00000103			WBGene00000562	WBGene00000784	WBGene00000478	WBGene00000174
WBGene00000105			WBGene00000563	WBGene00000792	WBGene00000485	WBGene00000175
WBGene00000106			WBGene00000594	WBGene00000795	WBGene00000493	WBGene00000181
WBGene00000107			WBGene00000596	WBGene00000803	WBGene00000503	WBGene00000182
WBGene00000108			WBGene00000597	WBGene00000819	WBGene00000507	WBGene00000183
WBGene00000109			WBGene00000599	WBGene00000829	WBGene00000520	WBGene00000184
WBGene00000110			WBGene00000601	WBGene00000835	WBGene00000531	WBGene00000187
WBGene00000111			WBGene00000602	WBGene00000839	WBGene00000544	WBGene00000188
WBGene00000112			WBGene00000603	WBGene00000841	WBGene00000552	WBGene00000189
WBGene00000113			WBGene00000606	WBGene00000863	WBGene00000583	WBGene00000192
WBGene00000114			WBGene00000608	WBGene00000868	WBGene00000770	WBGene00000193
WBGene00000115			WBGene00000611	WBGene00000885	WBGene00000785	WBGene00000195
WBGene00000116			WBGene00000612	WBGene00000900	WBGene00000786	WBGene00000197
WBGene00000117			WBGene00000614	WBGene00000905	WBGene00000813	WBGene00000198
WBGene00000118			WBGene00000615	WBGene00000913	WBGene00000815	WBGene00000199
WBGene00000120			WBGene00000616	WBGene00000929	WBGene00000816	WBGene00000201
WBGene00000121			WBGene00000617	WBGene00000935	WBGene00000865	WBGene00000203
WBGene00000122			WBGene00000618	WBGene00000961	WBGene00000866	WBGene00000208
WBGene00000123			WBGene00000620	WBGene00000968	WBGene00000867	WBGene00000212
WBGene00000137			WBGene00000622	WBGene00000977	WBGene00000870	WBGene00000217
WBGene00000139			WBGene00000625	WBGene00000978	WBGene00000872	WBGene00000224
WBGene00000140			WBGene00000626	WBGene00000986	WBGene00000877	WBGene00000225
WBGene00000142			WBGene00000627	WBGene00000991	WBGene00000878	WBGene00000228
WBGene00000143			WBGene00000631	WBGene00001043	WBGene00000879	WBGene00000229
WBGene00000144			WBGene00000634	WBGene00001061	WBGene00000883	WBGene00000230
WBGene00000145			WBGene00000636	WBGene00001086	WBGene00000889	WBGene00000235
WBGene00000146			WBGene00000637	WBGene00001088	WBGene00000891	WBGene00000240
WBGene00000147			WBGene00000638	WBGene00001101	WBGene00000894	WBGene00000242
WBGene00000148			WBGene00000639	WBGene00001156	WBGene00000895	WBGene00000244
WBGene00000149			WBGene00000640	WBGene00001162	WBGene00000897	WBGene00000247
WBGene00000150			WBGene00000641	WBGene00001178	WBGene00000898	WBGene00000253
WBGene00000155			WBGene00000644	WBGene00001182	WBGene00000911	WBGene00000257
WBGene00000156			WBGene00000645	WBGene00001247	WBGene00000912	WBGene00000266
WBGene00000157			WBGene00000647	WBGene00001249	WBGene00000938	WBGene00000271
WBGene00000158			WBGene00000649	WBGene00001425	WBGene00000941	WBGene00000276
WBGene00000159			WBGene00000650	WBGene00001429	WBGene00000942	WBGene00000280
WBGene00000160			WBGene00000651	WBGene00001432	WBGene00000950	WBGene00000283
WBGene00000161			WBGene00000653	WBGene00001439	WBGene00000952	WBGene00000292
WBGene00000162			WBGene00000654	WBGene00001440	WBGene00000958	WBGene00000293
WBGene00000163			WBGene00000655	WBGene00001481	WBGene00000972	WBGene00000294
WBGene00000164			WBGene00000656	WBGene00001483	WBGene00000985	WBGene00000295
WBGene00000165			WBGene00000657	WBGene00001484	WBGene00000989	WBGene00000298
WBGene00000166			WBGene00000659	WBGene00001486	WBGene00000994	WBGene00000366
WBGene00000169			WBGene00000660	WBGene00001487	WBGene00001002	WBGene00000368
WBGene00000170			WBGene00000661	WBGene00001492	WBGene00001008	WBGene00000369
WBGene00000171			WBGene00000663	WBGene00001493	WBGene00001033	WBGene00000372
WBGene00000172			WBGene00000664	WBGene00001568	WBGene00001050	WBGene00000375
WBGene00000173			WBGene00000665	WBGene00001574	WBGene00001053	WBGene00000376
WBGene00000174			WBGene00000666	WBGene00001595	WBGene00001080	WBGene00000377
WBGene00000175			WBGene00000667	WBGene00001596	WBGene00001081	WBGene00000378
WBGene00000176			WBGene00000668	WBGene00001598	WBGene00001116	WBGene00000379
WBGene00000177			WBGene00000669	WBGene00001599	WBGene00001137	WBGene00000380
WBGene00000178			WBGene00000670	WBGene00001600	WBGene00001161	WBGene00000381
WBGene00000180			WBGene00000671	WBGene00001601	WBGene00001166	WBGene00000383
WBGene00000181			WBGene00000675	WBGene00001609	WBGene00001167	WBGene00000390
WBGene00000182			WBGene00000676	WBGene00001614	WBGene00001168	WBGene00000393
WBGene00000183			WBGene00000678	WBGene00001615	WBGene00001169	WBGene00000403
WBGene00000184			WBGene00000679	WBGene00001616	WBGene00001184	WBGene00000405
WBGene00000187			WBGene00000680	WBGene00001622	WBGene00001194	WBGene00000407
WBGene00000188			WBGene00000681	WBGene00001624	WBGene00001204	WBGene00000408
WBGene00000189			WBGene00000682	WBGene00001630	WBGene00001207	WBGene00000409
WBGene00000190			WBGene00000685	WBGene00001653	WBGene00001235	WBGene00000410
WBGene00000192			WBGene00000687	WBGene00001678	WBGene00001242	WBGene00000416
WBGene00000193			WBGene00000690	WBGene00001681	WBGene00001281	WBGene00000417
WBGene00000195			WBGene00000691	WBGene00001752	WBGene00001329	WBGene00000419
WBGene00000196			WBGene00000692	WBGene00001753	WBGene00001330	WBGene00000422
WBGene00000197			WBGene00000693	WBGene00001756	WBGene00001332	WBGene00000426
WBGene00000198			WBGene00000694	WBGene00001759	WBGene00001334	WBGene00000435
WBGene00000199			WBGene00000696	WBGene00001764	WBGene00001365	WBGene00000437
WBGene00000200			WBGene00000697	WBGene00001769	WBGene00001371	WBGene00000443
WBGene00000201			WBGene00000698	WBGene00001776	WBGene00001395	WBGene00000451
WBGene00000202			WBGene00000699	WBGene00001777	WBGene00001396	WBGene00000452
WBGene00000203			WBGene00000701	WBGene00001780	WBGene00001403	WBGene00000464
WBGene00000204			WBGene00000703	WBGene00001786	WBGene00001406	WBGene00000466
WBGene00000205			WBGene00000704	WBGene00001787	WBGene00001410	WBGene00000476
WBGene00000206			WBGene00000705	WBGene00001789	WBGene00001427	WBGene00000479
WBGene00000207			WBGene00000706	WBGene00001795	WBGene00001428	WBGene00000480
WBGene00000208			WBGene00000707	WBGene00001796	WBGene00001430	WBGene00000481
WBGene00000209			WBGene00000710	WBGene00001812	WBGene00001434	WBGene00000482
WBGene00000210			WBGene00000711	WBGene00001817	WBGene00001479	WBGene00000484
WBGene00000211			WBGene00000713	WBGene00001818	WBGene00001489	WBGene00000490
WBGene00000212			WBGene00000714	WBGene00001851	WBGene00001494	WBGene00000491
WBGene00000213			WBGene00000715	WBGene00001862	WBGene00001496	WBGene00000492
WBGene00000214			WBGene00000716	WBGene00001943	WBGene00001505	WBGene00000498
WBGene00000215			WBGene00000717	WBGene00001946	WBGene00001513	WBGene00000499
WBGene00000216			WBGene00000718	WBGene00001950	WBGene00001516	WBGene00000500
WBGene00000217			WBGene00000719	WBGene00001954	WBGene00001520	WBGene00000501
WBGene00000218			WBGene00000720	WBGene00001961	WBGene00001557	WBGene00000502
WBGene00000219			WBGene00000721	WBGene00001995	WBGene00001559	WBGene00000506
WBGene00000220			WBGene00000722	WBGene00002011	WBGene00001591	WBGene00000508
WBGene00000222			WBGene00000723	WBGene00002012	WBGene00001592	WBGene00000510
WBGene00000223			WBGene00000724	WBGene00002013	WBGene00001593	WBGene00000515
WBGene00000224			WBGene00000725	WBGene00002015	WBGene00001604	WBGene00000518
WBGene00000225			WBGene00000726	WBGene00002016	WBGene00001623	WBGene00000519
WBGene00000226			WBGene00000727	WBGene00002017	WBGene00001626	WBGene00000530
WBGene00000227			WBGene00000728	WBGene00002021	WBGene00001640	WBGene00000532
WBGene00000228			WBGene00000729	WBGene00002023	WBGene00001643	WBGene00000533
WBGene00000229			WBGene00000730	WBGene00002030	WBGene00001644	WBGene00000536
WBGene00000230			WBGene00000731	WBGene00002053	WBGene00001647	WBGene00000539
WBGene00000231			WBGene00000732	WBGene00002054	WBGene00001651	WBGene00000540
WBGene00000232			WBGene00000733	WBGene00002069	WBGene00001682	WBGene00000541
WBGene00000233			WBGene00000734	WBGene00002149	WBGene00001707	WBGene00000542
WBGene00000235			WBGene00000735	WBGene00002180	WBGene00001743	WBGene00000543
WBGene00000236			WBGene00000737	WBGene00002198	WBGene00001748	WBGene00000545
WBGene00000238			WBGene00000738	WBGene00002218	WBGene00001758	WBGene00000546
WBGene00000240			WBGene00000739	WBGene00002225	WBGene00001773	WBGene00000547
WBGene00000241			WBGene00000740	WBGene00002226	WBGene00001792	WBGene00000549
WBGene00000242			WBGene00000741	WBGene00002244	WBGene00001814	WBGene00000550
WBGene00000244			WBGene00000742	WBGene00002265	WBGene00001819	WBGene00000553
WBGene00000246			WBGene00000743	WBGene00002269	WBGene00001829	WBGene00000554
WBGene00000247			WBGene00000744	WBGene00002270	WBGene00001830	WBGene00000561
WBGene00000248			WBGene00000745	WBGene00002271	WBGene00001833	WBGene00000565
WBGene00000249			WBGene00000746	WBGene00002272	WBGene00001836	WBGene00000566
WBGene00000250			WBGene00000747	WBGene00002273	WBGene00001837	WBGene00000567
WBGene00000251			WBGene00000748	WBGene00002275	WBGene00001865	WBGene00000585
WBGene00000252			WBGene00000749	WBGene00002299	WBGene00001875	WBGene00000591
WBGene00000253			WBGene00000751	WBGene00002915	WBGene00001879	WBGene00000761
WBGene00000254			WBGene00000752	WBGene00002976	WBGene00001884	WBGene00000762
WBGene00000256			WBGene00000753	WBGene00002979	WBGene00001888	WBGene00000763
WBGene00000257			WBGene00000754	WBGene00002999	WBGene00001892	WBGene00000764
WBGene00000259			WBGene00000757	WBGene00003001	WBGene00001900	WBGene00000765
WBGene00000262			WBGene00000759	WBGene00003002	WBGene00001902	WBGene00000766
WBGene00000265			WBGene00000775	WBGene00003008	WBGene00001905	WBGene00000767
WBGene00000266			WBGene00000777	WBGene00003018	WBGene00001911	WBGene00000768
WBGene00000267			WBGene00000780	WBGene00003040	WBGene00001912	WBGene00000773
WBGene00000269			WBGene00000781	WBGene00003107	WBGene00001920	WBGene00000774
WBGene00000270			WBGene00000783	WBGene00003124	WBGene00001924	WBGene00000776
WBGene00000271			WBGene00000789	WBGene00003133	WBGene00001930	WBGene00000778
WBGene00000274			WBGene00000820	WBGene00003151	WBGene00001934	WBGene00000787
WBGene00000275			WBGene00000821	WBGene00003163	WBGene00001938	WBGene00000788
WBGene00000276			WBGene00000899	WBGene00003178	WBGene00001941	WBGene00000793
WBGene00000277			WBGene00000902	WBGene00003224	WBGene00001945	WBGene00000794
WBGene00000279			WBGene00000904	WBGene00003229	WBGene00001948	WBGene00000796
WBGene00000280			WBGene00000908	WBGene00003235	WBGene00001949	WBGene00000798
WBGene00000281			WBGene00000910	WBGene00003239	WBGene00001952	WBGene00000799
WBGene00000282			WBGene00000951	WBGene00003242	WBGene00001953	WBGene00000800
WBGene00000283			WBGene00000955	WBGene00003369	WBGene00001955	WBGene00000802
WBGene00000289			WBGene00000965	WBGene00003370	WBGene00001972	WBGene00000812
WBGene00000292			WBGene00000969	WBGene00003384	WBGene00001975	WBGene00000814
WBGene00000293			WBGene00000980	WBGene00003413	WBGene00001994	WBGene00000817
WBGene00000294			WBGene00000992	WBGene00003414	WBGene00001997	WBGene00000818
WBGene00000295			WBGene00001022	WBGene00003480	WBGene00001998	WBGene00000822
WBGene00000296			WBGene00001023	WBGene00003482	WBGene00002002	WBGene00000830
WBGene00000298			WBGene00001034	WBGene00003495	WBGene00002004	WBGene00000831
WBGene00000301			WBGene00001036	WBGene00003509	WBGene00002046	WBGene00000832
WBGene00000366			WBGene00001057	WBGene00003511	WBGene00002048	WBGene00000833
WBGene00000367			WBGene00001059	WBGene00003518	WBGene00002050	WBGene00000834
WBGene00000368			WBGene00001064	WBGene00003526	WBGene00002051	WBGene00000836
WBGene00000369			WBGene00001065	WBGene00003527	WBGene00002052	WBGene00000837
WBGene00000371			WBGene00001066	WBGene00003562	WBGene00002066	WBGene00000838
WBGene00000372			WBGene00001067	WBGene00003578	WBGene00002079	WBGene00000840
WBGene00000373			WBGene00001068	WBGene00003588	WBGene00002150	WBGene00000843
WBGene00000375			WBGene00001069	WBGene00003597	WBGene00002173	WBGene00000846
WBGene00000376			WBGene00001074	WBGene00003623	WBGene00002175	WBGene00000854
WBGene00000377			WBGene00001075	WBGene00003639	WBGene00002176	WBGene00000857
WBGene00000378			WBGene00001076	WBGene00003675	WBGene00002179	WBGene00000858
WBGene00000379			WBGene00001096	WBGene00003729	WBGene00002216	WBGene00000869
WBGene00000380			WBGene00001102	WBGene00003779	WBGene00002227	WBGene00000871
WBGene00000381			WBGene00001133	WBGene00003793	WBGene00002232	WBGene00000874
WBGene00000382			WBGene00001145	WBGene00003797	WBGene00002239	WBGene00000875
WBGene00000383			WBGene00001157	WBGene00003801	WBGene00002242	WBGene00000876
WBGene00000386			WBGene00001158	WBGene00003802	WBGene00002248	WBGene00000880
WBGene00000387			WBGene00001186	WBGene00003805	WBGene00002252	WBGene00000881
WBGene00000388			WBGene00001190	WBGene00003807	WBGene00002259	WBGene00000882
WBGene00000389			WBGene00001210	WBGene00003808	WBGene00002260	WBGene00000884
WBGene00000390			WBGene00001214	WBGene00003838	WBGene00002266	WBGene00000886
WBGene00000391			WBGene00001223	WBGene00003839	WBGene00002267	WBGene00000887
WBGene00000392			WBGene00001237	WBGene00003840	WBGene00002268	WBGene00000888
WBGene00000393			WBGene00001239	WBGene00003841	WBGene00002276	WBGene00000890
WBGene00000396			WBGene00001240	WBGene00003851	WBGene00002295	WBGene00000892
WBGene00000397			WBGene00001245	WBGene00003909	WBGene00002344	WBGene00000896
WBGene00000399			WBGene00001253	WBGene00003912	WBGene00002583	WBGene00000903
WBGene00000403			WBGene00001324	WBGene00003915	WBGene00002601	WBGene00000906
WBGene00000405			WBGene00001337	WBGene00003937	WBGene00002804	WBGene00000914
WBGene00000406			WBGene00001345	WBGene00003939	WBGene00002850	WBGene00000915
WBGene00000407			WBGene00001400	WBGene00003941	WBGene00002891	WBGene00000917
WBGene00000408			WBGene00001401	WBGene00003943	WBGene00002981	WBGene00000923
WBGene00000409			WBGene00001402	WBGene00003957	WBGene00002982	WBGene00000931
WBGene00000410			WBGene00001433	WBGene00003958	WBGene00002986	WBGene00000933
WBGene00000411			WBGene00001438	WBGene00003959	WBGene00002987	WBGene00000934
WBGene00000412			WBGene00001465	WBGene00003982	WBGene00002990	WBGene00000936
WBGene00000413			WBGene00001466	WBGene00003996	WBGene00003033	WBGene00000937
WBGene00000414			WBGene00001488	WBGene00004011	WBGene00003034	WBGene00000939
WBGene00000415			WBGene00001490	WBGene00004013	WBGene00003037	WBGene00000940
WBGene00000416			WBGene00001491	WBGene00004029	WBGene00003058	WBGene00000959
WBGene00000417			WBGene00001511	WBGene00004044	WBGene00003060	WBGene00000960
WBGene00000419			WBGene00001538	WBGene00004048	WBGene00003066	WBGene00000962
WBGene00000420			WBGene00001551	WBGene00004086	WBGene00003068	WBGene00000963
WBGene00000421			WBGene00001553	WBGene00004135	WBGene00003084	WBGene00000964
WBGene00000422			WBGene00001560	WBGene00004143	WBGene00003089	WBGene00000966
WBGene00000424			WBGene00001565	WBGene00004147	WBGene00003102	WBGene00000967
WBGene00000425			WBGene00001578	WBGene00004189	WBGene00003106	WBGene00000970
WBGene00000426			WBGene00001583	WBGene00004196	WBGene00003130	WBGene00000971
WBGene00000428			WBGene00001586	WBGene00004212	WBGene00003132	WBGene00000973
WBGene00000429			WBGene00001587	WBGene00004245	WBGene00003134	WBGene00000974
WBGene00000430			WBGene00001594	WBGene00004264	WBGene00003142	WBGene00000976
WBGene00000431			WBGene00001602	WBGene00004303	WBGene00003149	WBGene00000979
WBGene00000432			WBGene00001618	WBGene00004306	WBGene00003155	WBGene00000981
WBGene00000433			WBGene00001621	WBGene00004312	WBGene00003166	WBGene00000982
WBGene00000435			WBGene00001625	WBGene00004395	WBGene00003168	WBGene00000983
WBGene00000436			WBGene00001633	WBGene00004401	WBGene00003171	WBGene00000984
WBGene00000437			WBGene00001637	WBGene00004410	WBGene00003172	WBGene00000988
WBGene00000438			WBGene00001666	WBGene00004443	WBGene00003174	WBGene00000993
WBGene00000439			WBGene00001669	WBGene00004737	WBGene00003183	WBGene00000996
WBGene00000440			WBGene00001726	WBGene00004749	WBGene00003196	WBGene00001001
WBGene00000441			WBGene00001732	WBGene00004778	WBGene00003220	WBGene00001005
WBGene00000443			WBGene00001750	WBGene00004786	WBGene00003225	WBGene00001006
WBGene00000445			WBGene00001751	WBGene00004798	WBGene00003233	WBGene00001007
WBGene00000446			WBGene00001754	WBGene00004857	WBGene00003234	WBGene00001016
WBGene00000447			WBGene00001755	WBGene00004858	WBGene00003367	WBGene00001017
WBGene00000448			WBGene00001757	WBGene00004898	WBGene00003372	WBGene00001018
WBGene00000449			WBGene00001760	WBGene00004923	WBGene00003373	WBGene00001019
WBGene00000450			WBGene00001761	WBGene00004924	WBGene00003374	WBGene00001020
WBGene00000451			WBGene00001762	WBGene00004933	WBGene00003376	WBGene00001025
WBGene00000452			WBGene00001763	WBGene00004949	WBGene00003377	WBGene00001026
WBGene00000453			WBGene00001765	WBGene00004995	WBGene00003387	WBGene00001027
WBGene00000454			WBGene00001766	WBGene00005644	WBGene00003394	WBGene00001028
WBGene00000457			WBGene00001767	WBGene00005649	WBGene00003396	WBGene00001029
WBGene00000458			WBGene00001768	WBGene00006050	WBGene00003397	WBGene00001030
WBGene00000461			WBGene00001770	WBGene00006051	WBGene00003404	WBGene00001031
WBGene00000463			WBGene00001772	WBGene00006052	WBGene00003406	WBGene00001032
WBGene00000464			WBGene00001774	WBGene00006053	WBGene00003409	WBGene00001035
WBGene00000466			WBGene00001775	WBGene00006063	WBGene00003410	WBGene00001037
WBGene00000468			WBGene00001778	WBGene00006066	WBGene00003412	WBGene00001038
WBGene00000469			WBGene00001779	WBGene00006068	WBGene00003418	WBGene00001039
WBGene00000472			WBGene00001781	WBGene00006331	WBGene00003472	WBGene00001040
WBGene00000473			WBGene00001782	WBGene00006392	WBGene00003476	WBGene00001041
WBGene00000474			WBGene00001783	WBGene00006436	WBGene00003479	WBGene00001042
WBGene00000475			WBGene00001784	WBGene00006450	WBGene00003485	WBGene00001045
WBGene00000476			WBGene00001785	WBGene00006462	WBGene00003504	WBGene00001046
WBGene00000477			WBGene00001824	WBGene00006466	WBGene00003510	WBGene00001047
WBGene00000478			WBGene00001852	WBGene00006475	WBGene00003516	WBGene00001048
WBGene00000479			WBGene00001869	WBGene00006486	WBGene00003566	WBGene00001049
WBGene00000480			WBGene00001913	WBGene00006487	WBGene00003570	WBGene00001051
WBGene00000481			WBGene00001944	WBGene00006496	WBGene00003571	WBGene00001052
WBGene00000482			WBGene00001957	WBGene00006504	WBGene00003573	WBGene00001054
WBGene00000483			WBGene00001958	WBGene00006528	WBGene00003574	WBGene00001055
WBGene00000484			WBGene00001960	WBGene00006529	WBGene00003575	WBGene00001056
WBGene00000485			WBGene00001971	WBGene00006530	WBGene00003582	WBGene00001058
WBGene00000487			WBGene00001980	WBGene00006531	WBGene00003585	WBGene00001073
WBGene00000490			WBGene00001985	WBGene00006533	WBGene00003592	WBGene00001077
WBGene00000491			WBGene00001996	WBGene00006535	WBGene00003594	WBGene00001078
WBGene00000492			WBGene00002018	WBGene00006562	WBGene00003595	WBGene00001082
WBGene00000493			WBGene00002019	WBGene00006587	WBGene00003605	WBGene00001087
WBGene00000498			WBGene00002020	WBGene00006588	WBGene00003657	WBGene00001089
WBGene00000499			WBGene00002024	WBGene00006589	WBGene00003659	WBGene00001090
WBGene00000500			WBGene00002026	WBGene00006608	WBGene00003681	WBGene00001092
WBGene00000501			WBGene00002027	WBGene00006609	WBGene00003730	WBGene00001093
WBGene00000502			WBGene00002032	WBGene00006611	WBGene00003734	WBGene00001094
WBGene00000503			WBGene00002033	WBGene00006657	WBGene00003738	WBGene00001095
WBGene00000506			WBGene00002037	WBGene00006658	WBGene00003772	WBGene00001115
WBGene00000507			WBGene00002055	WBGene00006663	WBGene00003776	WBGene00001117
WBGene00000508			WBGene00002056	WBGene00006665	WBGene00003796	WBGene00001118
WBGene00000509			WBGene00002057	WBGene00006668	WBGene00003822	WBGene00001119
WBGene00000510			WBGene00002058	WBGene00006672	WBGene00003825	WBGene00001121
WBGene00000511			WBGene00002059	WBGene00006675	WBGene00003827	WBGene00001122
WBGene00000512			WBGene00002060	WBGene00006677	WBGene00003828	WBGene00001127
WBGene00000513			WBGene00002063	WBGene00006682	WBGene00003830	WBGene00001129
WBGene00000514			WBGene00002073	WBGene00006683	WBGene00003835	WBGene00001130
WBGene00000515			WBGene00002151	WBGene00006684	WBGene00003836	WBGene00001131
WBGene00000517			WBGene00002174	WBGene00006691	WBGene00003844	WBGene00001132
WBGene00000518			WBGene00002177	WBGene00006692	WBGene00003846	WBGene00001134
WBGene00000519			WBGene00002199	WBGene00006712	WBGene00003847	WBGene00001135
WBGene00000520			WBGene00002200	WBGene00006718	WBGene00003878	WBGene00001149
WBGene00000521			WBGene00002205	WBGene00006736	WBGene00003889	WBGene00001150
WBGene00000527			WBGene00002211	WBGene00006754	WBGene00003902	WBGene00001151
WBGene00000528			WBGene00002214	WBGene00006774	WBGene00003903	WBGene00001153
WBGene00000529			WBGene00002220	WBGene00006777	WBGene00003918	WBGene00001154
WBGene00000530			WBGene00002263	WBGene00006778	WBGene00003938	WBGene00001155
WBGene00000531			WBGene00002282	WBGene00006802	WBGene00003948	WBGene00001160
WBGene00000532			WBGene00002783	WBGene00006814	WBGene00003953	WBGene00001163
WBGene00000533			WBGene00002827	WBGene00006816	WBGene00003955	WBGene00001171
WBGene00000534			WBGene00002881	WBGene00006820	WBGene00003956	WBGene00001172
WBGene00000535			WBGene00002974	WBGene00006844	WBGene00003980	WBGene00001173
WBGene00000536			WBGene00003015	WBGene00006845	WBGene00003986	WBGene00001177
WBGene00000537			WBGene00003031	WBGene00006864	WBGene00003995	WBGene00001179
WBGene00000539			WBGene00003035	WBGene00006874	WBGene00004003	WBGene00001187
WBGene00000540			WBGene00003055	WBGene00006881	WBGene00004024	WBGene00001188
WBGene00000541			WBGene00003057	WBGene00006888	WBGene00004031	WBGene00001189
WBGene00000542			WBGene00003072	WBGene00006894	WBGene00004051	WBGene00001196
WBGene00000543			WBGene00003087	WBGene00006896	WBGene00004052	WBGene00001202
WBGene00000544			WBGene00003111	WBGene00006914	WBGene00004068	WBGene00001208
WBGene00000545			WBGene00003144	WBGene00006915	WBGene00004076	WBGene00001209
WBGene00000546			WBGene00003170	WBGene00006916	WBGene00004077	WBGene00001215
WBGene00000547			WBGene00003209	WBGene00006938	WBGene00004095	WBGene00001224
WBGene00000548			WBGene00003210	WBGene00006940	WBGene00004117	WBGene00001225
WBGene00000549			WBGene00003222	WBGene00006971	WBGene00004130	WBGene00001226
WBGene00000550			WBGene00003236	WBGene00006976	WBGene00004140	WBGene00001227
WBGene00000551			WBGene00003241	WBGene00007015	WBGene00004166	WBGene00001228
WBGene00000552			WBGene00003258	WBGene00007060	WBGene00004191	WBGene00001229
WBGene00000553			WBGene00003371	WBGene00007062	WBGene00004192	WBGene00001230
WBGene00000554			WBGene00003385	WBGene00007080	WBGene00004193	WBGene00001231
WBGene00000561			WBGene00003388	WBGene00007089	WBGene00004195	WBGene00001232
WBGene00000562			WBGene00003395	WBGene00007100	WBGene00004199	WBGene00001233
WBGene00000563			WBGene00003402	WBGene00007140	WBGene00004209	WBGene00001234
WBGene00000564			WBGene00003497	WBGene00007204	WBGene00004211	WBGene00001236
WBGene00000565			WBGene00003499	WBGene00007223	WBGene00004217	WBGene00001241
WBGene00000566			WBGene00003507	WBGene00007245	WBGene00004224	WBGene00001248
WBGene00000567			WBGene00003520	WBGene00007258	WBGene00004233	WBGene00001258
WBGene00000583			WBGene00003521	WBGene00007261	WBGene00004269	WBGene00001259
WBGene00000584			WBGene00003522	WBGene00007268	WBGene00004271	WBGene00001262
WBGene00000585			WBGene00003523	WBGene00007303	WBGene00004284	WBGene00001263
WBGene00000591			WBGene00003524	WBGene00007357	WBGene00004296	WBGene00001303
WBGene00000594			WBGene00003525	WBGene00007363	WBGene00004313	WBGene00001320
WBGene00000596			WBGene00003531	WBGene00007364	WBGene00004316	WBGene00001328
WBGene00000597			WBGene00003532	WBGene00007436	WBGene00004317	WBGene00001331
WBGene00000599			WBGene00003559	WBGene00007513	WBGene00004318	WBGene00001333
WBGene00000601			WBGene00003564	WBGene00007565	WBGene00004335	WBGene00001335
WBGene00000602			WBGene00003568	WBGene00007584	WBGene00004336	WBGene00001336
WBGene00000603			WBGene00003590	WBGene00007631	WBGene00004340	WBGene00001338
WBGene00000606			WBGene00003591	WBGene00007635	WBGene00004343	WBGene00001340
WBGene00000608			WBGene00003593	WBGene00007643	WBGene00004350	WBGene00001352
WBGene00000611			WBGene00003599	WBGene00007668	WBGene00004359	WBGene00001358
WBGene00000612			WBGene00003607	WBGene00007680	WBGene00004360	WBGene00001366
WBGene00000614			WBGene00003613	WBGene00007697	WBGene00004364	WBGene00001368
WBGene00000615			WBGene00003628	WBGene00007774	WBGene00004372	WBGene00001372
WBGene00000616			WBGene00003732	WBGene00007776	WBGene00004375	WBGene00001374
WBGene00000617			WBGene00003773	WBGene00007786	WBGene00004382	WBGene00001377
WBGene00000618			WBGene00003777	WBGene00007877	WBGene00004392	WBGene00001397
WBGene00000620			WBGene00003785	WBGene00007913	WBGene00004403	WBGene00001398
WBGene00000622			WBGene00003790	WBGene00007914	WBGene00004404	WBGene00001399
WBGene00000625			WBGene00003792	WBGene00007944	WBGene00004424	WBGene00001404
WBGene00000626			WBGene00003795	WBGene00007955	WBGene00004442	WBGene00001405
WBGene00000627			WBGene00003842	WBGene00007988	WBGene00004450	WBGene00001411
WBGene00000631			WBGene00003843	WBGene00007994	WBGene00004453	WBGene00001412
WBGene00000634			WBGene00003850	WBGene00008027	WBGene00004459	WBGene00001414
WBGene00000636			WBGene00003862	WBGene00008028	WBGene00004469	WBGene00001423
WBGene00000637			WBGene00003863	WBGene00008029	WBGene00004490	WBGene00001426
WBGene00000638			WBGene00003864	WBGene00008030	WBGene00004493	WBGene00001431
WBGene00000639			WBGene00003865	WBGene00008092	WBGene00004497	WBGene00001443
WBGene00000640			WBGene00003962	WBGene00008127	WBGene00004499	WBGene00001470
WBGene00000641			WBGene00003976	WBGene00008137	WBGene00004680	WBGene00001475
WBGene00000644			WBGene00003989	WBGene00008166	WBGene00004698	WBGene00001476
WBGene00000645			WBGene00003991	WBGene00008185	WBGene00004701	WBGene00001477
WBGene00000647			WBGene00003997	WBGene00008186	WBGene00004719	WBGene00001478
WBGene00000649			WBGene00003998	WBGene00008275	WBGene00004723	WBGene00001480
WBGene00000650			WBGene00003999	WBGene00008278	WBGene00004732	WBGene00001485
WBGene00000651			WBGene00004000	WBGene00008283	WBGene00004742	WBGene00001497
WBGene00000653			WBGene00004001	WBGene00008297	WBGene00004762	WBGene00001498
WBGene00000654			WBGene00004002	WBGene00008330	WBGene00004768	WBGene00001499
WBGene00000655			WBGene00004004	WBGene00008346	WBGene00004771	WBGene00001500
WBGene00000656			WBGene00004005	WBGene00008375	WBGene00004773	WBGene00001501
WBGene00000657			WBGene00004006	WBGene00008387	WBGene00004776	WBGene00001502
WBGene00000659			WBGene00004007	WBGene00008396	WBGene00004779	WBGene00001503
WBGene00000660			WBGene00004008	WBGene00008404	WBGene00004780	WBGene00001507
WBGene00000661			WBGene00004017	WBGene00008407	WBGene00004793	WBGene00001508
WBGene00000663			WBGene00004020	WBGene00008441	WBGene00004803	WBGene00001509
WBGene00000664			WBGene00004023	WBGene00008459	WBGene00004860	WBGene00001510
WBGene00000665			WBGene00004056	WBGene00008510	WBGene00004874	WBGene00001512
WBGene00000666			WBGene00004057	WBGene00008516	WBGene00004876	WBGene00001515
WBGene00000667			WBGene00004062	WBGene00008521	WBGene00004877	WBGene00001519
WBGene00000668			WBGene00004083	WBGene00008551	WBGene00004879	WBGene00001522
WBGene00000669			WBGene00004114	WBGene00008592	WBGene00004881	WBGene00001523
WBGene00000670			WBGene00004115	WBGene00008593	WBGene00004884	WBGene00001526
WBGene00000671			WBGene00004132	WBGene00008594	WBGene00004886	WBGene00001527
WBGene00000674			WBGene00004146	WBGene00008595	WBGene00004887	WBGene00001552
WBGene00000675			WBGene00004216	WBGene00008596	WBGene00004889	WBGene00001554
WBGene00000676			WBGene00004218	WBGene00008597	WBGene00004905	WBGene00001555
WBGene00000678			WBGene00004219	WBGene00008601	WBGene00004915	WBGene00001556
WBGene00000679			WBGene00004220	WBGene00008607	WBGene00004950	WBGene00001558
WBGene00000680			WBGene00004221	WBGene00008625	WBGene00004952	WBGene00001577
WBGene00000681			WBGene00004222	WBGene00008678	WBGene00004978	WBGene00001579
WBGene00000682			WBGene00004223	WBGene00008690	WBGene00004979	WBGene00001580
WBGene00000685			WBGene00004225	WBGene00008711	WBGene00004981	WBGene00001582
WBGene00000687			WBGene00004226	WBGene00008768	WBGene00004985	WBGene00001585
WBGene00000690			WBGene00004227	WBGene00008780	WBGene00005010	WBGene00001590
WBGene00000691			WBGene00004228	WBGene00008785	WBGene00005013	WBGene00001612
WBGene00000692			WBGene00004229	WBGene00008793	WBGene00005024	WBGene00001613
WBGene00000693			WBGene00004230	WBGene00008821	WBGene00005642	WBGene00001620
WBGene00000694			WBGene00004231	WBGene00008890	WBGene00005643	WBGene00001627
WBGene00000696			WBGene00004232	WBGene00008910	WBGene00005647	WBGene00001628
WBGene00000697			WBGene00004234	WBGene00008936	WBGene00005648	WBGene00001629
WBGene00000698			WBGene00004235	WBGene00008990	WBGene00006064	WBGene00001632
WBGene00000699			WBGene00004236	WBGene00008996	WBGene00006310	WBGene00001635
WBGene00000701			WBGene00004237	WBGene00009058	WBGene00006324	WBGene00001636
WBGene00000703			WBGene00004239	WBGene00009059	WBGene00006363	WBGene00001638
WBGene00000704			WBGene00004241	WBGene00009146	WBGene00006365	WBGene00001639
WBGene00000705			WBGene00004242	WBGene00009153	WBGene00006385	WBGene00001641
WBGene00000706			WBGene00004243	WBGene00009178	WBGene00006390	WBGene00001642
WBGene00000707			WBGene00004244	WBGene00009226	WBGene00006391	WBGene00001645
WBGene00000708			WBGene00004249	WBGene00009236	WBGene00006393	WBGene00001646
WBGene00000710			WBGene00004275	WBGene00009245	WBGene00006394	WBGene00001648
WBGene00000711			WBGene00004300	WBGene00009271	WBGene00006396	WBGene00001650
WBGene00000713			WBGene00004309	WBGene00009326	WBGene00006402	WBGene00001660
WBGene00000714			WBGene00004349	WBGene00009337	WBGene00006406	WBGene00001661
WBGene00000715			WBGene00004363	WBGene00009370	WBGene00006407	WBGene00001662
WBGene00000716			WBGene00004384	WBGene00009484	WBGene00006411	WBGene00001674
WBGene00000717			WBGene00004397	WBGene00009505	WBGene00006412	WBGene00001679
WBGene00000718			WBGene00004398	WBGene00009513	WBGene00006418	WBGene00001680
WBGene00000719			WBGene00004508	WBGene00009540	WBGene00006423	WBGene00001683
WBGene00000720			WBGene00004509	WBGene00009556	WBGene00006435	WBGene00001684
WBGene00000721			WBGene00004510	WBGene00009558	WBGene00006438	WBGene00001685
WBGene00000722			WBGene00004699	WBGene00009579	WBGene00006444	WBGene00001686
WBGene00000723			WBGene00004702	WBGene00009584	WBGene00006460	WBGene00001687
WBGene00000724			WBGene00004765	WBGene00009636	WBGene00006463	WBGene00001708
WBGene00000725			WBGene00004775	WBGene00009648	WBGene00006468	WBGene00001709
WBGene00000726			WBGene00004795	WBGene00009678	WBGene00006476	WBGene00001740
WBGene00000727			WBGene00004804	WBGene00009730	WBGene00006489	WBGene00001744
WBGene00000728			WBGene00004809	WBGene00009739	WBGene00006498	WBGene00001745
WBGene00000729			WBGene00004810	WBGene00009824	WBGene00006505	WBGene00001746
WBGene00000730			WBGene00004811	WBGene00009852	WBGene00006508	WBGene00001747
WBGene00000731			WBGene00004812	WBGene00009880	WBGene00006513	WBGene00001749
WBGene00000732			WBGene00004859	WBGene00009881	WBGene00006514	WBGene00001771
WBGene00000733			WBGene00004890	WBGene00009890	WBGene00006516	WBGene00001790
WBGene00000734			WBGene00004893	WBGene00009891	WBGene00006517	WBGene00001791
WBGene00000735			WBGene00004894	WBGene00009895	WBGene00006519	WBGene00001793
WBGene00000737			WBGene00004922	WBGene00009896	WBGene00006524	WBGene00001794
WBGene00000738			WBGene00004926	WBGene00009899	WBGene00006536	WBGene00001808
WBGene00000739			WBGene00004928	WBGene00009924	WBGene00006537	WBGene00001811
WBGene00000740			WBGene00004958	WBGene00009929	WBGene00006540	WBGene00001813
WBGene00000741			WBGene00004963	WBGene00009939	WBGene00006541	WBGene00001815
WBGene00000742			WBGene00004984	WBGene00009940	WBGene00006571	WBGene00001816
WBGene00000743			WBGene00004993	WBGene00009958	WBGene00006572	WBGene00001823
WBGene00000744			WBGene00004996	WBGene00009993	WBGene00006574	WBGene00001827
WBGene00000745			WBGene00005006	WBGene00010012	WBGene00006577	WBGene00001834
WBGene00000746			WBGene00005009	WBGene00010062	WBGene00006584	WBGene00001840
WBGene00000747			WBGene00005016	WBGene00010063	WBGene00006585	WBGene00001843
WBGene00000748			WBGene00005017	WBGene00010067	WBGene00006586	WBGene00001844
WBGene00000749			WBGene00005153	WBGene00010093	WBGene00006597	WBGene00001853
WBGene00000751			WBGene00005226	WBGene00010120	WBGene00006600	WBGene00001854
WBGene00000752			WBGene00005895	WBGene00010204	WBGene00006601	WBGene00001855
WBGene00000753			WBGene00006055	WBGene00010230	WBGene00006614	WBGene00001856
WBGene00000754			WBGene00006065	WBGene00010306	WBGene00006619	WBGene00001857
WBGene00000757			WBGene00006067	WBGene00010339	WBGene00006620	WBGene00001860
WBGene00000759			WBGene00006366	WBGene00010380	WBGene00006635	WBGene00001863
WBGene00000761			WBGene00006375	WBGene00010383	WBGene00006652	WBGene00001872
WBGene00000762			WBGene00006380	WBGene00010403	WBGene00006662	WBGene00001876
WBGene00000763			WBGene00006384	WBGene00010423	WBGene00006671	WBGene00001877
WBGene00000764			WBGene00006395	WBGene00010439	WBGene00006680	WBGene00001878
WBGene00000765			WBGene00006431	WBGene00010458	WBGene00006704	WBGene00001880
WBGene00000766			WBGene00006452	WBGene00010554	WBGene00006705	WBGene00001881
WBGene00000767			WBGene00006454	WBGene00010593	WBGene00006706	WBGene00001882
WBGene00000768			WBGene00006484	WBGene00010614	WBGene00006714	WBGene00001883
WBGene00000770			WBGene00006499	WBGene00010616	WBGene00006716	WBGene00001885
WBGene00000771			WBGene00006532	WBGene00010663	WBGene00006721	WBGene00001886
WBGene00000772			WBGene00006534	WBGene00010671	WBGene00006722	WBGene00001887
WBGene00000773			WBGene00006544	WBGene00010705	WBGene00006723	WBGene00001889
WBGene00000774			WBGene00006556	WBGene00010706	WBGene00006725	WBGene00001890
WBGene00000775			WBGene00006557	WBGene00010707	WBGene00006726	WBGene00001891
WBGene00000776			WBGene00006570	WBGene00010709	WBGene00006727	WBGene00001893
WBGene00000777			WBGene00006576	WBGene00010716	WBGene00006735	WBGene00001894
WBGene00000778			WBGene00006580	WBGene00010730	WBGene00006738	WBGene00001895
WBGene00000780			WBGene00006582	WBGene00010731	WBGene00006744	WBGene00001896
WBGene00000781			WBGene00006593	WBGene00010755	WBGene00006748	WBGene00001898
WBGene00000782			WBGene00006604	WBGene00010763	WBGene00006752	WBGene00001899
WBGene00000783			WBGene00006605	WBGene00010767	WBGene00006759	WBGene00001901
WBGene00000784			WBGene00006610	WBGene00010768	WBGene00006760	WBGene00001903
WBGene00000785			WBGene00006616	WBGene00010812	WBGene00006764	WBGene00001904
WBGene00000786			WBGene00006621	WBGene00010857	WBGene00006770	WBGene00001906
WBGene00000787			WBGene00006637	WBGene00010867	WBGene00006773	WBGene00001907
WBGene00000788			WBGene00006640	WBGene00010904	WBGene00006779	WBGene00001908
WBGene00000789			WBGene00006649	WBGene00010909	WBGene00006791	WBGene00001909
WBGene00000792			WBGene00006656	WBGene00010922	WBGene00006792	WBGene00001915
WBGene00000793			WBGene00006659	WBGene00010936	WBGene00006794	WBGene00001916
WBGene00000794			WBGene00006664	WBGene00010959	WBGene00006797	WBGene00001917
WBGene00000795			WBGene00006666	WBGene00010960	WBGene00006801	WBGene00001918
WBGene00000796			WBGene00006667	WBGene00010962	WBGene00006804	WBGene00001919
WBGene00000798			WBGene00006670	WBGene00010963	WBGene00006811	WBGene00001921
WBGene00000799			WBGene00006673	WBGene00010964	WBGene00006812	WBGene00001922
WBGene00000800			WBGene00006674	WBGene00010965	WBGene00006832	WBGene00001923
WBGene00000802			WBGene00006676	WBGene00010967	WBGene00006868	WBGene00001925
WBGene00000803			WBGene00006678	WBGene00010993	WBGene00006869	WBGene00001926
WBGene00000812			WBGene00006681	WBGene00011009	WBGene00006875	WBGene00001927
WBGene00000813			WBGene00006687	WBGene00011052	WBGene00006882	WBGene00001928
WBGene00000814			WBGene00006690	WBGene00011054	WBGene00006893	WBGene00001929
WBGene00000815			WBGene00006693	WBGene00011059	WBGene00006911	WBGene00001931
WBGene00000816			WBGene00006694	WBGene00011067	WBGene00006912	WBGene00001932
WBGene00000817			WBGene00006710	WBGene00011094	WBGene00006920	WBGene00001933
WBGene00000818			WBGene00006717	WBGene00011181	WBGene00006924	WBGene00001935
WBGene00000819			WBGene00006719	WBGene00011193	WBGene00006941	WBGene00001936
WBGene00000820			WBGene00006737	WBGene00011218	WBGene00006961	WBGene00001937
WBGene00000821			WBGene00006739	WBGene00011230	WBGene00006970	WBGene00001939
WBGene00000822			WBGene00006741	WBGene00011242	WBGene00006975	WBGene00001940
WBGene00000829			WBGene00006765	WBGene00011269	WBGene00006999	WBGene00001942
WBGene00000830			WBGene00006784	WBGene00011283	WBGene00007012	WBGene00001959
WBGene00000831			WBGene00006827	WBGene00011318	WBGene00007017	WBGene00001973
WBGene00000832			WBGene00006852	WBGene00011333	WBGene00007019	WBGene00001974
WBGene00000833			WBGene00006861	WBGene00011340	WBGene00007022	WBGene00001978
WBGene00000834			WBGene00006873	WBGene00011401	WBGene00007027	WBGene00001979
WBGene00000835			WBGene00006886	WBGene00011439	WBGene00007043	WBGene00001983
WBGene00000836			WBGene00006897	WBGene00011444	WBGene00007047	WBGene00001993
WBGene00000837			WBGene00006947	WBGene00011486	WBGene00007101	WBGene00001999
WBGene00000838			WBGene00006948	WBGene00011522	WBGene00007104	WBGene00002000
WBGene00000839			WBGene00006950	WBGene00011528	WBGene00007107	WBGene00002001
WBGene00000840			WBGene00006952	WBGene00011556	WBGene00007108	WBGene00002003
WBGene00000841			WBGene00006953	WBGene00011587	WBGene00007118	WBGene00002005
WBGene00000843			WBGene00006954	WBGene00011589	WBGene00007126	WBGene00002007
WBGene00000846			WBGene00006955	WBGene00011630	WBGene00007138	WBGene00002008
WBGene00000854			WBGene00006959	WBGene00011688	WBGene00007146	WBGene00002010
WBGene00000857			WBGene00006978	WBGene00011705	WBGene00007186	WBGene00002025
WBGene00000858			WBGene00006982	WBGene00011724	WBGene00007195	WBGene00002028
WBGene00000863			WBGene00006988	WBGene00011755	WBGene00007200	WBGene00002029
WBGene00000865			WBGene00007006	WBGene00011776	WBGene00007202	WBGene00002031
WBGene00000866			WBGene00007016	WBGene00011807	WBGene00007203	WBGene00002035
WBGene00000867			WBGene00007041	WBGene00011824	WBGene00007215	WBGene00002036
WBGene00000868			WBGene00007064	WBGene00011828	WBGene00007312	WBGene00002038
WBGene00000869			WBGene00007067	WBGene00011830	WBGene00007333	WBGene00002039
WBGene00000870			WBGene00007068	WBGene00011835	WBGene00007339	WBGene00002040
WBGene00000871			WBGene00007071	WBGene00011871	WBGene00007347	WBGene00002041
WBGene00000872			WBGene00007072	WBGene00011882	WBGene00007351	WBGene00002042
WBGene00000874			WBGene00007073	WBGene00011906	WBGene00007384	WBGene00002043
WBGene00000875			WBGene00007130	WBGene00011936	WBGene00007386	WBGene00002044
WBGene00000876			WBGene00007141	WBGene00011955	WBGene00007404	WBGene00002045
WBGene00000877			WBGene00007153	WBGene00011965	WBGene00007433	WBGene00002047
WBGene00000878			WBGene00007170	WBGene00011966	WBGene00007434	WBGene00002061
WBGene00000879			WBGene00007176	WBGene00011972	WBGene00007443	WBGene00002062
WBGene00000880			WBGene00007190	WBGene00011994	WBGene00007464	WBGene00002064
WBGene00000881			WBGene00007228	WBGene00012016	WBGene00007476	WBGene00002065
WBGene00000882			WBGene00007248	WBGene00012073	WBGene00007480	WBGene00002070
WBGene00000883			WBGene00007252	WBGene00012116	WBGene00007488	WBGene00002071
WBGene00000884			WBGene00007254	WBGene00012131	WBGene00007490	WBGene00002074
WBGene00000885			WBGene00007255	WBGene00012137	WBGene00007507	WBGene00002075
WBGene00000886			WBGene00007270	WBGene00012150	WBGene00007508	WBGene00002076
WBGene00000887			WBGene00007282	WBGene00012168	WBGene00007509	WBGene00002077
WBGene00000888			WBGene00007284	WBGene00012170	WBGene00007516	WBGene00002078
WBGene00000889			WBGene00007307	WBGene00012186	WBGene00007517	WBGene00002080
WBGene00000890			WBGene00007328	WBGene00012198	WBGene00007520	WBGene00002081
WBGene00000891			WBGene00007331	WBGene00012201	WBGene00007529	WBGene00002083
WBGene00000892			WBGene00007356	WBGene00012251	WBGene00007588	WBGene00002146
WBGene00000894			WBGene00007362	WBGene00012253	WBGene00007591	WBGene00002147
WBGene00000895			WBGene00007369	WBGene00012259	WBGene00007603	WBGene00002152
WBGene00000896			WBGene00007385	WBGene00012275	WBGene00007616	WBGene00002153
WBGene00000897			WBGene00007396	WBGene00012280	WBGene00007625	WBGene00002162
WBGene00000898			WBGene00007398	WBGene00012302	WBGene00007645	WBGene00002169
WBGene00000899			WBGene00007422	WBGene00012356	WBGene00007653	WBGene00002178
WBGene00000900			WBGene00007448	WBGene00012389	WBGene00007690	WBGene00002181
WBGene00000902			WBGene00007455	WBGene00012402	WBGene00007698	WBGene00002182
WBGene00000903			WBGene00007462	WBGene00012445	WBGene00007704	WBGene00002183
WBGene00000904			WBGene00007493	WBGene00012467	WBGene00007708	WBGene00002184
WBGene00000905			WBGene00007533	WBGene00012483	WBGene00007711	WBGene00002185
WBGene00000906			WBGene00007545	WBGene00012489	WBGene00007744	WBGene00002189
WBGene00000908			WBGene00007587	WBGene00012531	WBGene00007745	WBGene00002190
WBGene00000910			WBGene00007602	WBGene00012558	WBGene00007750	WBGene00002191
WBGene00000911			WBGene00007605	WBGene00012626	WBGene00007752	WBGene00002192
WBGene00000912			WBGene00007650	WBGene00012648	WBGene00007756	WBGene00002196
WBGene00000913			WBGene00007670	WBGene00012693	WBGene00007761	WBGene00002201
WBGene00000914			WBGene00007684	WBGene00012712	WBGene00007772	WBGene00002202
WBGene00000915			WBGene00007702	WBGene00012767	WBGene00007784	WBGene00002203
WBGene00000917			WBGene00007709	WBGene00012768	WBGene00007808	WBGene00002207
WBGene00000923			WBGene00007710	WBGene00012794	WBGene00007848	WBGene00002213
WBGene00000929			WBGene00007732	WBGene00012807	WBGene00007862	WBGene00002215
WBGene00000931			WBGene00007740	WBGene00012811	WBGene00007904	WBGene00002217
WBGene00000933			WBGene00007760	WBGene00012813	WBGene00007923	WBGene00002219
WBGene00000934			WBGene00007764	WBGene00012826	WBGene00007954	WBGene00002222
WBGene00000935			WBGene00007813	WBGene00012828	WBGene00007956	WBGene00002223
WBGene00000936			WBGene00007820	WBGene00012829	WBGene00007963	WBGene00002228
WBGene00000937			WBGene00007824	WBGene00012855	WBGene00007964	WBGene00002229
WBGene00000938			WBGene00007825	WBGene00012894	WBGene00007965	WBGene00002230
WBGene00000939			WBGene00007846	WBGene00012908	WBGene00007967	WBGene00002233
WBGene00000940			WBGene00007847	WBGene00012925	WBGene00007979	WBGene00002235
WBGene00000941			WBGene00007849	WBGene00012970	WBGene00007984	WBGene00002238
WBGene00000942			WBGene00007859	WBGene00012977	WBGene00007995	WBGene00002243
WBGene00000950			WBGene00007880	WBGene00012990	WBGene00008000	WBGene00002245
WBGene00000951			WBGene00007885	WBGene00012994	WBGene00008008	WBGene00002247
WBGene00000952			WBGene00007946	WBGene00012997	WBGene00008018	WBGene00002249
WBGene00000955			WBGene00007966	WBGene00013004	WBGene00008034	WBGene00002251
WBGene00000958			WBGene00008022	WBGene00013014	WBGene00008094	WBGene00002257
WBGene00000959			WBGene00008065	WBGene00013041	WBGene00008123	WBGene00002258
WBGene00000960			WBGene00008093	WBGene00013043	WBGene00008140	WBGene00002261
WBGene00000961			WBGene00008097	WBGene00013075	WBGene00008148	WBGene00002262
WBGene00000962			WBGene00008107	WBGene00013106	WBGene00008149	WBGene00002264
WBGene00000963			WBGene00008129	WBGene00013147	WBGene00008183	WBGene00002280
WBGene00000964			WBGene00008144	WBGene00013150	WBGene00008220	WBGene00002297
WBGene00000965			WBGene00008147	WBGene00013188	WBGene00008224	WBGene00002324
WBGene00000966			WBGene00008159	WBGene00013189	WBGene00008238	WBGene00002335
WBGene00000967			WBGene00008160	WBGene00013207	WBGene00008252	WBGene00002348
WBGene00000968			WBGene00008161	WBGene00013239	WBGene00008274	WBGene00002363
WBGene00000969			WBGene00008162	WBGene00013260	WBGene00008316	WBGene00002497
WBGene00000970			WBGene00008214	WBGene00013290	WBGene00008317	WBGene00002632
WBGene00000971			WBGene00008222	WBGene00013308	WBGene00008348	WBGene00002637
WBGene00000972			WBGene00008230	WBGene00013422	WBGene00008361	WBGene00002694
WBGene00000973			WBGene00008260	WBGene00013520	WBGene00008400	WBGene00002696
WBGene00000974			WBGene00008265	WBGene00013541	WBGene00008412	WBGene00002717
WBGene00000976			WBGene00008270	WBGene00013575	WBGene00008418	WBGene00002845
WBGene00000977			WBGene00008284	WBGene00013585	WBGene00008419	WBGene00002855
WBGene00000978			WBGene00008290	WBGene00013654	WBGene00008424	WBGene00002879
WBGene00000979			WBGene00008291	WBGene00013665	WBGene00008426	WBGene00002889
WBGene00000980			WBGene00008293	WBGene00013674	WBGene00008427	WBGene00002957
WBGene00000981			WBGene00008294	WBGene00013677	WBGene00008428	WBGene00002978
WBGene00000982			WBGene00008296	WBGene00013680	WBGene00008429	WBGene00002980
WBGene00000983			WBGene00008304	WBGene00013703	WBGene00008430	WBGene00002985
WBGene00000984			WBGene00008314	WBGene00013711	WBGene00008435	WBGene00002988
WBGene00000985			WBGene00008409	WBGene00013792	WBGene00008443	WBGene00002989
WBGene00000986			WBGene00008433	WBGene00013857	WBGene00008457	WBGene00002991
WBGene00000988			WBGene00008444	WBGene00013862	WBGene00008458	WBGene00002996
WBGene00000989			WBGene00008471	WBGene00013877	WBGene00008504	WBGene00002998
WBGene00000991			WBGene00008476	WBGene00013881	WBGene00008506	WBGene00003000
WBGene00000992			WBGene00008477	WBGene00013883	WBGene00008519	WBGene00003007
WBGene00000993			WBGene00008478	WBGene00013996	WBGene00008547	WBGene00003009
WBGene00000994			WBGene00008479	WBGene00014028	WBGene00008548	WBGene00003014
WBGene00000996			WBGene00008485	WBGene00014052	WBGene00008555	WBGene00003017
WBGene00001001			WBGene00008486	WBGene00014077	WBGene00008565	WBGene00003020
WBGene00001002			WBGene00008491	WBGene00014102	WBGene00008598	WBGene00003024
WBGene00001005			WBGene00008499	WBGene00014103	WBGene00008621	WBGene00003025
WBGene00001006			WBGene00008512	WBGene00014200	WBGene00008624	WBGene00003026
WBGene00001007			WBGene00008533	WBGene00014208	WBGene00008665	WBGene00003030
WBGene00001008			WBGene00008542	WBGene00014220	WBGene00008667	WBGene00003036
WBGene00001016			WBGene00008549	WBGene00014226	WBGene00008683	WBGene00003041
WBGene00001017			WBGene00008560	WBGene00014240	WBGene00008694	WBGene00003043
WBGene00001018			WBGene00008581	WBGene00014669	WBGene00008722	WBGene00003047
WBGene00001019			WBGene00008591	WBGene00014938	WBGene00008745	WBGene00003048
WBGene00001020			WBGene00008604	WBGene00014989	WBGene00008750	WBGene00003052
WBGene00001022			WBGene00008652	WBGene00015008	WBGene00008764	WBGene00003059
WBGene00001023			WBGene00008669	WBGene00015025	WBGene00008805	WBGene00003061
WBGene00001025			WBGene00008681	WBGene00015035	WBGene00008808	WBGene00003062
WBGene00001026			WBGene00008692	WBGene00015050	WBGene00008819	WBGene00003063
WBGene00001027			WBGene00008707	WBGene00015062	WBGene00008832	WBGene00003064
WBGene00001028			WBGene00008714	WBGene00015074	WBGene00008857	WBGene00003071
WBGene00001029			WBGene00008746	WBGene00015091	WBGene00008860	WBGene00003073
WBGene00001030			WBGene00008748	WBGene00015098	WBGene00008878	WBGene00003074
WBGene00001031			WBGene00008762	WBGene00015112	WBGene00008887	WBGene00003076
WBGene00001032			WBGene00008776	WBGene00015113	WBGene00008918	WBGene00003077
WBGene00001033			WBGene00008779	WBGene00015130	WBGene00008925	WBGene00003078
WBGene00001034			WBGene00008787	WBGene00015150	WBGene00008948	WBGene00003079
WBGene00001035			WBGene00008801	WBGene00015162	WBGene00008950	WBGene00003080
WBGene00001036			WBGene00008802	WBGene00015190	WBGene00008959	WBGene00003081
WBGene00001037			WBGene00008804	WBGene00015246	WBGene00008973	WBGene00003082
WBGene00001038			WBGene00008829	WBGene00015247	WBGene00009011	WBGene00003085
WBGene00001039			WBGene00008861	WBGene00015273	WBGene00009013	WBGene00003086
WBGene00001040			WBGene00008891	WBGene00015287	WBGene00009051	WBGene00003112
WBGene00001041			WBGene00008897	WBGene00015303	WBGene00009057	WBGene00003119
WBGene00001042			WBGene00008905	WBGene00015327	WBGene00009064	WBGene00003123
WBGene00001043			WBGene00008911	WBGene00015336	WBGene00009078	WBGene00003129
WBGene00001045			WBGene00008932	WBGene00015337	WBGene00009098	WBGene00003136
WBGene00001046			WBGene00008934	WBGene00015349	WBGene00009112	WBGene00003143
WBGene00001047			WBGene00008957	WBGene00015406	WBGene00009118	WBGene00003148
WBGene00001048			WBGene00008969	WBGene00015418	WBGene00009126	WBGene00003150
WBGene00001049			WBGene00008976	WBGene00015437	WBGene00009127	WBGene00003153
WBGene00001050			WBGene00008980	WBGene00015462	WBGene00009128	WBGene00003154
WBGene00001051			WBGene00008997	WBGene00015464	WBGene00009132	WBGene00003156
WBGene00001052			WBGene00008998	WBGene00015479	WBGene00009139	WBGene00003157
WBGene00001053			WBGene00009001	WBGene00015499	WBGene00009141	WBGene00003158
WBGene00001054			WBGene00009009	WBGene00015501	WBGene00009165	WBGene00003159
WBGene00001055			WBGene00009032	WBGene00015513	WBGene00009180	WBGene00003161
WBGene00001056			WBGene00009073	WBGene00015564	WBGene00009186	WBGene00003162
WBGene00001057			WBGene00009089	WBGene00015628	WBGene00009204	WBGene00003164
WBGene00001058			WBGene00009106	WBGene00015648	WBGene00009221	WBGene00003175
WBGene00001059			WBGene00009110	WBGene00015650	WBGene00009238	WBGene00003177
WBGene00001061			WBGene00009113	WBGene00015673	WBGene00009256	WBGene00003182
WBGene00001064			WBGene00009142	WBGene00015693	WBGene00009267	WBGene00003185
WBGene00001065			WBGene00009148	WBGene00015704	WBGene00009286	WBGene00003186
WBGene00001066			WBGene00009156	WBGene00015776	WBGene00009292	WBGene00003214
WBGene00001067			WBGene00009162	WBGene00015789	WBGene00009304	WBGene00003232
WBGene00001068			WBGene00009192	WBGene00015865	WBGene00009307	WBGene00003243
WBGene00001069			WBGene00009219	WBGene00015889	WBGene00009316	WBGene00003246
WBGene00001073			WBGene00009251	WBGene00015914	WBGene00009329	WBGene00003247
WBGene00001074			WBGene00009255	WBGene00015939	WBGene00009341	WBGene00003253
WBGene00001075			WBGene00009257	WBGene00015942	WBGene00009353	WBGene00003254
WBGene00001076			WBGene00009263	WBGene00015993	WBGene00009389	WBGene00003368
WBGene00001077			WBGene00009306	WBGene00016002	WBGene00009403	WBGene00003375
WBGene00001078			WBGene00009314	WBGene00016057	WBGene00009435	WBGene00003378
WBGene00001080			WBGene00009323	WBGene00016060	WBGene00009441	WBGene00003389
WBGene00001081			WBGene00009325	WBGene00016061	WBGene00009443	WBGene00003390
WBGene00001082			WBGene00009340	WBGene00016062	WBGene00009450	WBGene00003391
WBGene00001086			WBGene00009347	WBGene00016066	WBGene00009475	WBGene00003392
WBGene00001087			WBGene00009362	WBGene00016074	WBGene00009477	WBGene00003393
WBGene00001088			WBGene00009364	WBGene00016101	WBGene00009485	WBGene00003400
WBGene00001089			WBGene00009378	WBGene00016110	WBGene00009507	WBGene00003401
WBGene00001090			WBGene00009384	WBGene00016116	WBGene00009532	WBGene00003405
WBGene00001092			WBGene00009386	WBGene00016118	WBGene00009553	WBGene00003407
WBGene00001093			WBGene00009444	WBGene00016134	WBGene00009565	WBGene00003408
WBGene00001094			WBGene00009445	WBGene00016147	WBGene00009586	WBGene00003411
WBGene00001095			WBGene00009447	WBGene00016162	WBGene00009594	WBGene00003415
WBGene00001096			WBGene00009455	WBGene00016196	WBGene00009622	WBGene00003417
WBGene00001101			WBGene00009456	WBGene00016202	WBGene00009627	WBGene00003421
WBGene00001102			WBGene00009492	WBGene00016265	WBGene00009635	WBGene00003422
WBGene00001115			WBGene00009499	WBGene00016269	WBGene00009650	WBGene00003423
WBGene00001116			WBGene00009508	WBGene00016350	WBGene00009654	WBGene00003475
WBGene00001117			WBGene00009548	WBGene00016375	WBGene00009665	WBGene00003477
WBGene00001118			WBGene00009576	WBGene00016412	WBGene00009706	WBGene00003478
WBGene00001119			WBGene00009578	WBGene00016421	WBGene00009717	WBGene00003514
WBGene00001121			WBGene00009582	WBGene00016504	WBGene00009731	WBGene00003515
WBGene00001122			WBGene00009587	WBGene00016545	WBGene00009735	WBGene00003517
WBGene00001127			WBGene00009661	WBGene00016546	WBGene00009745	WBGene00003519
WBGene00001129			WBGene00009663	WBGene00016547	WBGene00009781	WBGene00003555
WBGene00001130			WBGene00009673	WBGene00016549	WBGene00009784	WBGene00003558
WBGene00001131			WBGene00009691	WBGene00016550	WBGene00009793	WBGene00003561
WBGene00001132			WBGene00009692	WBGene00016589	WBGene00009800	WBGene00003563
WBGene00001133			WBGene00009695	WBGene00016600	WBGene00009801	WBGene00003567
WBGene00001134			WBGene00009729	WBGene00016614	WBGene00009831	WBGene00003569
WBGene00001135			WBGene00009740	WBGene00016631	WBGene00009865	WBGene00003572
WBGene00001137			WBGene00009743	WBGene00016652	WBGene00009882	WBGene00003576
WBGene00001145			WBGene00009773	WBGene00016664	WBGene00009892	WBGene00003579
WBGene00001149			WBGene00009796	WBGene00016729	WBGene00009922	WBGene00003580
WBGene00001150			WBGene00009818	WBGene00016790	WBGene00009930	WBGene00003581
WBGene00001151			WBGene00009854	WBGene00016793	WBGene00009952	WBGene00003583
WBGene00001153			WBGene00009855	WBGene00016845	WBGene00009998	WBGene00003584
WBGene00001154			WBGene00009856	WBGene00016846	WBGene00010002	WBGene00003586
WBGene00001155			WBGene00009857	WBGene00016849	WBGene00010013	WBGene00003587
WBGene00001156			WBGene00009859	WBGene00016911	WBGene00010028	WBGene00003589
WBGene00001157			WBGene00009860	WBGene00016937	WBGene00010045	WBGene00003596
WBGene00001158			WBGene00009876	WBGene00016973	WBGene00010061	WBGene00003622
WBGene00001160			WBGene00009897	WBGene00016987	WBGene00010075	WBGene00003654
WBGene00001161			WBGene00009932	WBGene00017013	WBGene00010096	WBGene00003731
WBGene00001162			WBGene00009937	WBGene00017039	WBGene00010139	WBGene00003733
WBGene00001163			WBGene00009942	WBGene00017045	WBGene00010159	WBGene00003735
WBGene00001166			WBGene00009956	WBGene00017071	WBGene00010231	WBGene00003736
WBGene00001167			WBGene00009960	WBGene00017078	WBGene00010286	WBGene00003774
WBGene00001168			WBGene00009977	WBGene00017080	WBGene00010296	WBGene00003775
WBGene00001169			WBGene00009980	WBGene00017123	WBGene00010337	WBGene00003778
WBGene00001171			WBGene00010010	WBGene00017159	WBGene00010356	WBGene00003787
WBGene00001172			WBGene00010011	WBGene00017164	WBGene00010364	WBGene00003788
WBGene00001173			WBGene00010037	WBGene00017170	WBGene00010370	WBGene00003789
WBGene00001177			WBGene00010047	WBGene00017179	WBGene00010418	WBGene00003794
WBGene00001178			WBGene00010082	WBGene00017183	WBGene00010427	WBGene00003798
WBGene00001179			WBGene00010109	WBGene00017269	WBGene00010465	WBGene00003799
WBGene00001182			WBGene00010134	WBGene00017289	WBGene00010476	WBGene00003800
WBGene00001184			WBGene00010155	WBGene00017328	WBGene00010479	WBGene00003803
WBGene00001186			WBGene00010162	WBGene00017357	WBGene00010480	WBGene00003804
WBGene00001187			WBGene00010167	WBGene00017360	WBGene00010488	WBGene00003806
WBGene00001188			WBGene00010169	WBGene00017419	WBGene00010502	WBGene00003815
WBGene00001189			WBGene00010182	WBGene00017437	WBGene00010505	WBGene00003816
WBGene00001190			WBGene00010192	WBGene00017464	WBGene00010510	WBGene00003818
WBGene00001194			WBGene00010199	WBGene00017482	WBGene00010551	WBGene00003821
WBGene00001196			WBGene00010228	WBGene00017676	WBGene00010557	WBGene00003826
WBGene00001202			WBGene00010280	WBGene00017705	WBGene00010579	WBGene00003829
WBGene00001204			WBGene00010282	WBGene00017707	WBGene00010606	WBGene00003831
WBGene00001207			WBGene00010302	WBGene00017742	WBGene00010609	WBGene00003834
WBGene00001208			WBGene00010309	WBGene00017757	WBGene00010610	WBGene00003858
WBGene00001209			WBGene00010323	WBGene00017760	WBGene00010631	WBGene00003870
WBGene00001210			WBGene00010329	WBGene00017812	WBGene00010638	WBGene00003876
WBGene00001214			WBGene00010345	WBGene00017860	WBGene00010640	WBGene00003877
WBGene00001215			WBGene00010349	WBGene00017909	WBGene00010641	WBGene00003882
WBGene00001223			WBGene00010399	WBGene00017921	WBGene00010642	WBGene00003883
WBGene00001224			WBGene00010409	WBGene00017931	WBGene00010675	WBGene00003884
WBGene00001225			WBGene00010411	WBGene00017944	WBGene00010677	WBGene00003885
WBGene00001226			WBGene00010456	WBGene00017950	WBGene00010702	WBGene00003886
WBGene00001227			WBGene00010470	WBGene00017954	WBGene00010704	WBGene00003892
WBGene00001228			WBGene00010471	WBGene00017967	WBGene00010722	WBGene00003893
WBGene00001229			WBGene00010472	WBGene00018002	WBGene00010732	WBGene00003898
WBGene00001230			WBGene00010473	WBGene00018006	WBGene00010759	WBGene00003901
WBGene00001231			WBGene00010498	WBGene00018023	WBGene00010762	WBGene00003904
WBGene00001232			WBGene00010545	WBGene00018061	WBGene00010771	WBGene00003905
WBGene00001233			WBGene00010558	WBGene00018206	WBGene00010785	WBGene00003906
WBGene00001234			WBGene00010572	WBGene00018269	WBGene00010803	WBGene00003907
WBGene00001235			WBGene00010583	WBGene00018354	WBGene00010842	WBGene00003911
WBGene00001236			WBGene00010619	WBGene00018366	WBGene00010845	WBGene00003914
WBGene00001237			WBGene00010626	WBGene00018475	WBGene00010856	WBGene00003916
WBGene00001239			WBGene00010637	WBGene00018513	WBGene00010858	WBGene00003919
WBGene00001240			WBGene00010654	WBGene00018527	WBGene00010875	WBGene00003920
WBGene00001241			WBGene00010661	WBGene00018564	WBGene00010890	WBGene00003921
WBGene00001242			WBGene00010666	WBGene00018566	WBGene00010891	WBGene00003922
WBGene00001245			WBGene00010678	WBGene00018567	WBGene00010908	WBGene00003923
WBGene00001247			WBGene00010681	WBGene00018568	WBGene00010915	WBGene00003924
WBGene00001248			WBGene00010684	WBGene00018572	WBGene00010923	WBGene00003925
WBGene00001249			WBGene00010694	WBGene00018593	WBGene00010975	WBGene00003926
WBGene00001253			WBGene00010698	WBGene00018611	WBGene00010990	WBGene00003927
WBGene00001258			WBGene00010700	WBGene00018661	WBGene00011017	WBGene00003928
WBGene00001259			WBGene00010738	WBGene00018698	WBGene00011035	WBGene00003929
WBGene00001262			WBGene00010766	WBGene00018757	WBGene00011038	WBGene00003930
WBGene00001263			WBGene00010770	WBGene00018812	WBGene00011058	WBGene00003931
WBGene00001281			WBGene00010783	WBGene00018819	WBGene00011064	WBGene00003932
WBGene00001303			WBGene00010784	WBGene00018831	WBGene00011068	WBGene00003947
WBGene00001320			WBGene00010796	WBGene00018853	WBGene00011089	WBGene00003949
WBGene00001324			WBGene00010828	WBGene00018885	WBGene00011123	WBGene00003950
WBGene00001328			WBGene00010834	WBGene00018900	WBGene00011143	WBGene00003951
WBGene00001329			WBGene00010888	WBGene00018911	WBGene00011144	WBGene00003952
WBGene00001330			WBGene00010905	WBGene00018912	WBGene00011146	WBGene00003954
WBGene00001331			WBGene00010913	WBGene00018963	WBGene00011155	WBGene00003961
WBGene00001332			WBGene00010999	WBGene00019030	WBGene00011156	WBGene00003963
WBGene00001333			WBGene00011000	WBGene00019087	WBGene00011194	WBGene00003964
WBGene00001334			WBGene00011053	WBGene00019096	WBGene00011235	WBGene00003965
WBGene00001335			WBGene00011055	WBGene00019128	WBGene00011240	WBGene00003966
WBGene00001336			WBGene00011076	WBGene00019178	WBGene00011247	WBGene00003967
WBGene00001337			WBGene00011088	WBGene00019179	WBGene00011258	WBGene00003969
WBGene00001338			WBGene00011090	WBGene00019185	WBGene00011268	WBGene00003970
WBGene00001340			WBGene00011092	WBGene00019225	WBGene00011298	WBGene00003975
WBGene00001345			WBGene00011093	WBGene00019237	WBGene00011315	WBGene00003978
WBGene00001352			WBGene00011102	WBGene00019264	WBGene00011327	WBGene00004014
WBGene00001358			WBGene00011105	WBGene00019289	WBGene00011334	WBGene00004015
WBGene00001365			WBGene00011112	WBGene00019301	WBGene00011338	WBGene00004016
WBGene00001366			WBGene00011130	WBGene00019328	WBGene00011348	WBGene00004025
WBGene00001368			WBGene00011168	WBGene00019339	WBGene00011353	WBGene00004028
WBGene00001371			WBGene00011169	WBGene00019342	WBGene00011367	WBGene00004032
WBGene00001372			WBGene00011173	WBGene00019349	WBGene00011391	WBGene00004033
WBGene00001374			WBGene00011175	WBGene00019364	WBGene00011392	WBGene00004034
WBGene00001377			WBGene00011205	WBGene00019394	WBGene00011393	WBGene00004035
WBGene00001395			WBGene00011248	WBGene00019438	WBGene00011407	WBGene00004036
WBGene00001396			WBGene00011249	WBGene00019478	WBGene00011408	WBGene00004038
WBGene00001397			WBGene00011259	WBGene00019584	WBGene00011411	WBGene00004039
WBGene00001398			WBGene00011262	WBGene00019612	WBGene00011416	WBGene00004040
WBGene00001399			WBGene00011266	WBGene00019617	WBGene00011419	WBGene00004042
WBGene00001400			WBGene00011270	WBGene00019636	WBGene00011436	WBGene00004043
WBGene00001401			WBGene00011273	WBGene00019667	WBGene00011437	WBGene00004045
WBGene00001402			WBGene00011279	WBGene00019686	WBGene00011474	WBGene00004046
WBGene00001403			WBGene00011291	WBGene00019692	WBGene00011511	WBGene00004047
WBGene00001404			WBGene00011299	WBGene00019730	WBGene00011526	WBGene00004049
WBGene00001405			WBGene00011313	WBGene00019767	WBGene00011527	WBGene00004055
WBGene00001406			WBGene00011330	WBGene00019782	WBGene00011532	WBGene00004058
WBGene00001410			WBGene00011339	WBGene00019786	WBGene00011554	WBGene00004059
WBGene00001411			WBGene00011354	WBGene00019792	WBGene00011559	WBGene00004060
WBGene00001412			WBGene00011355	WBGene00019808	WBGene00011563	WBGene00004061
WBGene00001414			WBGene00011356	WBGene00019817	WBGene00011573	WBGene00004063
WBGene00001423			WBGene00011358	WBGene00019831	WBGene00011576	WBGene00004064
WBGene00001425			WBGene00011359	WBGene00019875	WBGene00011580	WBGene00004075
WBGene00001426			WBGene00011360	WBGene00019883	WBGene00011593	WBGene00004085
WBGene00001427			WBGene00011361	WBGene00019885	WBGene00011596	WBGene00004087
WBGene00001428			WBGene00011372	WBGene00019886	WBGene00011604	WBGene00004088
WBGene00001429			WBGene00011381	WBGene00019895	WBGene00011614	WBGene00004089
WBGene00001430			WBGene00011382	WBGene00019935	WBGene00011615	WBGene00004090
WBGene00001431			WBGene00011414	WBGene00019937	WBGene00011631	WBGene00004091
WBGene00001432			WBGene00011424	WBGene00019940	WBGene00011637	WBGene00004092
WBGene00001433			WBGene00011454	WBGene00019959	WBGene00011642	WBGene00004101
WBGene00001434			WBGene00011469	WBGene00019965	WBGene00011645	WBGene00004109
WBGene00001438			WBGene00011495	WBGene00019980	WBGene00011673	WBGene00004121
WBGene00001439			WBGene00011501	WBGene00019986	WBGene00011676	WBGene00004131
WBGene00001440			WBGene00011503	WBGene00020016	WBGene00011679	WBGene00004134
WBGene00001443			WBGene00011523	WBGene00020017	WBGene00011729	WBGene00004136
WBGene00001465			WBGene00011578	WBGene00020031	WBGene00011732	WBGene00004151
WBGene00001466			WBGene00011584	WBGene00020036	WBGene00011740	WBGene00004178
WBGene00001470			WBGene00011606	WBGene00020037	WBGene00011743	WBGene00004179
WBGene00001475			WBGene00011611	WBGene00020046	WBGene00011759	WBGene00004180
WBGene00001476			WBGene00011613	WBGene00020094	WBGene00011832	WBGene00004181
WBGene00001477			WBGene00011621	WBGene00020163	WBGene00011834	WBGene00004183
WBGene00001478			WBGene00011635	WBGene00020166	WBGene00011868	WBGene00004184
WBGene00001479			WBGene00011636	WBGene00020197	WBGene00011878	WBGene00004185
WBGene00001480			WBGene00011644	WBGene00020208	WBGene00011892	WBGene00004186
WBGene00001481			WBGene00011650	WBGene00020283	WBGene00011917	WBGene00004187
WBGene00001483			WBGene00011655	WBGene00020284	WBGene00011923	WBGene00004188
WBGene00001484			WBGene00011658	WBGene00020299	WBGene00011926	WBGene00004190
WBGene00001485			WBGene00011659	WBGene00020307	WBGene00011935	WBGene00004194
WBGene00001486			WBGene00011665	WBGene00020321	WBGene00011941	WBGene00004197
WBGene00001487			WBGene00011698	WBGene00020348	WBGene00011964	WBGene00004198
WBGene00001488			WBGene00011699	WBGene00020368	WBGene00011969	WBGene00004201
WBGene00001489			WBGene00011730	WBGene00020427	WBGene00011980	WBGene00004203
WBGene00001490			WBGene00011739	WBGene00020444	WBGene00012020	WBGene00004204
WBGene00001491			WBGene00011742	WBGene00020471	WBGene00012029	WBGene00004205
WBGene00001492			WBGene00011756	WBGene00020486	WBGene00012094	WBGene00004206
WBGene00001493			WBGene00011779	WBGene00020498	WBGene00012124	WBGene00004207
WBGene00001494			WBGene00011780	WBGene00020506	WBGene00012127	WBGene00004208
WBGene00001496			WBGene00011781	WBGene00020516	WBGene00012132	WBGene00004210
WBGene00001497			WBGene00011803	WBGene00020530	WBGene00012143	WBGene00004213
WBGene00001498			WBGene00011806	WBGene00020556	WBGene00012158	WBGene00004214
WBGene00001499			WBGene00011829	WBGene00020559	WBGene00012162	WBGene00004215
WBGene00001500			WBGene00011852	WBGene00020646	WBGene00012164	WBGene00004248
WBGene00001501			WBGene00011853	WBGene00020689	WBGene00012182	WBGene00004254
WBGene00001502			WBGene00011859	WBGene00020694	WBGene00012184	WBGene00004255
WBGene00001503			WBGene00011866	WBGene00020770	WBGene00012194	WBGene00004256
WBGene00001505			WBGene00011879	WBGene00020784	WBGene00012209	WBGene00004257
WBGene00001507			WBGene00011883	WBGene00020827	WBGene00012225	WBGene00004258
WBGene00001508			WBGene00011887	WBGene00020875	WBGene00012244	WBGene00004259
WBGene00001509			WBGene00011890	WBGene00020888	WBGene00012276	WBGene00004266
WBGene00001510			WBGene00011918	WBGene00020889	WBGene00012315	WBGene00004267
WBGene00001511			WBGene00011929	WBGene00020901	WBGene00012316	WBGene00004268
WBGene00001512			WBGene00011932	WBGene00020903	WBGene00012322	WBGene00004270
WBGene00001513			WBGene00011948	WBGene00020914	WBGene00012343	WBGene00004272
WBGene00001515			WBGene00011949	WBGene00020931	WBGene00012348	WBGene00004273
WBGene00001516			WBGene00011953	WBGene00020936	WBGene00012354	WBGene00004274
WBGene00001519			WBGene00011971	WBGene00020954	WBGene00012360	WBGene00004276
WBGene00001520			WBGene00012002	WBGene00021003	WBGene00012366	WBGene00004277
WBGene00001522			WBGene00012010	WBGene00021022	WBGene00012371	WBGene00004278
WBGene00001523			WBGene00012013	WBGene00021041	WBGene00012394	WBGene00004279
WBGene00001526			WBGene00012022	WBGene00021093	WBGene00012464	WBGene00004281
WBGene00001527			WBGene00012023	WBGene00021121	WBGene00012465	WBGene00004282
WBGene00001538			WBGene00012024	WBGene00021167	WBGene00012468	WBGene00004283
WBGene00001551			WBGene00012025	WBGene00021185	WBGene00012496	WBGene00004285
WBGene00001552			WBGene00012040	WBGene00021209	WBGene00012518	WBGene00004286
WBGene00001553			WBGene00012075	WBGene00021227	WBGene00012562	WBGene00004287
WBGene00001554			WBGene00012102	WBGene00021249	WBGene00012631	WBGene00004297
WBGene00001555			WBGene00012103	WBGene00021304	WBGene00012643	WBGene00004298
WBGene00001556			WBGene00012121	WBGene00021320	WBGene00012647	WBGene00004302
WBGene00001557			WBGene00012135	WBGene00021332	WBGene00012650	WBGene00004304
WBGene00001558			WBGene00012166	WBGene00021368	WBGene00012696	WBGene00004305
WBGene00001559			WBGene00012172	WBGene00021376	WBGene00012704	WBGene00004307
WBGene00001560			WBGene00012188	WBGene00021406	WBGene00012713	WBGene00004308
WBGene00001565			WBGene00012206	WBGene00021412	WBGene00012718	WBGene00004310
WBGene00001568			WBGene00012207	WBGene00021421	WBGene00012722	WBGene00004311
WBGene00001574			WBGene00012222	WBGene00021457	WBGene00012739	WBGene00004314
WBGene00001577			WBGene00012236	WBGene00021502	WBGene00012756	WBGene00004315
WBGene00001578			WBGene00012270	WBGene00021507	WBGene00012780	WBGene00004319
WBGene00001579			WBGene00012271	WBGene00021537	WBGene00012804	WBGene00004320
WBGene00001580			WBGene00012285	WBGene00021544	WBGene00012830	WBGene00004321
WBGene00001582			WBGene00012293	WBGene00021566	WBGene00012887	WBGene00004322
WBGene00001583			WBGene00012317	WBGene00021613	WBGene00012891	WBGene00004337
WBGene00001585			WBGene00012330	WBGene00021629	WBGene00012896	WBGene00004338
WBGene00001586			WBGene00012332	WBGene00021645	WBGene00012927	WBGene00004339
WBGene00001587			WBGene00012352	WBGene00021667	WBGene00012933	WBGene00004341
WBGene00001590			WBGene00012369	WBGene00021709	WBGene00012950	WBGene00004344
WBGene00001591			WBGene00012373	WBGene00021778	WBGene00012967	WBGene00004345
WBGene00001592			WBGene00012379	WBGene00021780	WBGene00012982	WBGene00004348
WBGene00001593			WBGene00012393	WBGene00021796	WBGene00012984	WBGene00004355
WBGene00001594			WBGene00012416	WBGene00021797	WBGene00012987	WBGene00004356
WBGene00001595			WBGene00012428	WBGene00021812	WBGene00013002	WBGene00004357
WBGene00001596			WBGene00012437	WBGene00021852	WBGene00013028	WBGene00004358
WBGene00001598			WBGene00012457	WBGene00021856	WBGene00013038	WBGene00004361
WBGene00001599			WBGene00012466	WBGene00021900	WBGene00013042	WBGene00004367
WBGene00001600			WBGene00012474	WBGene00021931	WBGene00013093	WBGene00004368
WBGene00001601			WBGene00012475	WBGene00021933	WBGene00013094	WBGene00004371
WBGene00001602			WBGene00012532	WBGene00021945	WBGene00013109	WBGene00004373
WBGene00001604			WBGene00012535	WBGene00021983	WBGene00013132	WBGene00004377
WBGene00001609			WBGene00012536	WBGene00021994	WBGene00013135	WBGene00004378
WBGene00001612			WBGene00012549	WBGene00022021	WBGene00013139	WBGene00004381
WBGene00001613			WBGene00012560	WBGene00022025	WBGene00013143	WBGene00004383
WBGene00001614			WBGene00012582	WBGene00022040	WBGene00013177	WBGene00004385
WBGene00001615			WBGene00012583	WBGene00022053	WBGene00013202	WBGene00004386
WBGene00001616			WBGene00012586	WBGene00022057	WBGene00013209	WBGene00004387
WBGene00001618			WBGene00012610	WBGene00022077	WBGene00013215	WBGene00004388
WBGene00001620			WBGene00012621	WBGene00022138	WBGene00013217	WBGene00004389
WBGene00001621			WBGene00012664	WBGene00022170	WBGene00013223	WBGene00004390
WBGene00001622			WBGene00012678	WBGene00022180	WBGene00013237	WBGene00004391
WBGene00001623			WBGene00012681	WBGene00022207	WBGene00013238	WBGene00004393
WBGene00001624			WBGene00012682	WBGene00022223	WBGene00013244	WBGene00004400
WBGene00001625			WBGene00012683	WBGene00022235	WBGene00013255	WBGene00004402
WBGene00001626			WBGene00012686	WBGene00022313	WBGene00013258	WBGene00004405
WBGene00001627			WBGene00012688	WBGene00022348	WBGene00013266	WBGene00004408
WBGene00001628			WBGene00012726	WBGene00022365	WBGene00013268	WBGene00004409
WBGene00001629			WBGene00012738	WBGene00022377	WBGene00013269	WBGene00004411
WBGene00001630			WBGene00012747	WBGene00022379	WBGene00013301	WBGene00004412
WBGene00001632			WBGene00012757	WBGene00022392	WBGene00013312	WBGene00004413
WBGene00001633			WBGene00012763	WBGene00022434	WBGene00013344	WBGene00004414
WBGene00001635			WBGene00012776	WBGene00022454	WBGene00013373	WBGene00004415
WBGene00001636			WBGene00012782	WBGene00022492	WBGene00013376	WBGene00004416
WBGene00001637			WBGene00012791	WBGene00022499	WBGene00013378	WBGene00004417
WBGene00001638			WBGene00012792	WBGene00022512	WBGene00013406	WBGene00004418
WBGene00001639			WBGene00012802	WBGene00022567	WBGene00013407	WBGene00004419
WBGene00001640			WBGene00012814	WBGene00022568	WBGene00013416	WBGene00004420
WBGene00001641			WBGene00012816	WBGene00022570	WBGene00013433	WBGene00004421
WBGene00001642			WBGene00012835	WBGene00022572	WBGene00013446	WBGene00004422
WBGene00001643			WBGene00012845	WBGene00022573	WBGene00013447	WBGene00004423
WBGene00001644			WBGene00012857	WBGene00022574	WBGene00013457	WBGene00004425
WBGene00001645			WBGene00012889	WBGene00022583	WBGene00013461	WBGene00004426
WBGene00001646			WBGene00012934	WBGene00022631	WBGene00013529	WBGene00004427
WBGene00001647			WBGene00012942	WBGene00022635	WBGene00013587	WBGene00004428
WBGene00001648			WBGene00013021	WBGene00022642	WBGene00013643	WBGene00004429
WBGene00001650			WBGene00013030	WBGene00022663	WBGene00013650	WBGene00004430
WBGene00001651			WBGene00013049	WBGene00022675	WBGene00013666	WBGene00004431
WBGene00001653			WBGene00013100	WBGene00022769	WBGene00013668	WBGene00004432
WBGene00001660			WBGene00013119	WBGene00022772	WBGene00013669	WBGene00004433
WBGene00001661			WBGene00013124	WBGene00022773	WBGene00013671	WBGene00004434
WBGene00001662			WBGene00013138	WBGene00022780	WBGene00013725	WBGene00004435
WBGene00001666			WBGene00013156	WBGene00022785	WBGene00013738	WBGene00004436
WBGene00001669			WBGene00013161	WBGene00022787	WBGene00013739	WBGene00004437
WBGene00001674			WBGene00013187	WBGene00022808	WBGene00013789	WBGene00004438
WBGene00001678			WBGene00013194	WBGene00022816	WBGene00013835	WBGene00004439
WBGene00001679			WBGene00013231	WBGene00022837	WBGene00013847	WBGene00004440
WBGene00001680			WBGene00013235	WBGene00023404	WBGene00013855	WBGene00004441
WBGene00001681			WBGene00013240	WBGene00023450	WBGene00013869	WBGene00004444
WBGene00001682			WBGene00013256	WBGene00043056	WBGene00013892	WBGene00004445
WBGene00001683			WBGene00013261	WBGene00043064	WBGene00013894	WBGene00004446
WBGene00001684			WBGene00013270	WBGene00044071	WBGene00013895	WBGene00004447
WBGene00001685			WBGene00013273	WBGene00044121	WBGene00013914	WBGene00004448
WBGene00001686			WBGene00013292	WBGene00044201	WBGene00013919	WBGene00004449
WBGene00001687			WBGene00013300	WBGene00044608	WBGene00013926	WBGene00004451
WBGene00001707			WBGene00013307	WBGene00044631	WBGene00013971	WBGene00004452
WBGene00001708			WBGene00013325	WBGene00044650	WBGene00013972	WBGene00004454
WBGene00001709			WBGene00013338	WBGene00044794	WBGene00013983	WBGene00004456
WBGene00001726			WBGene00013350	WBGene00044811	WBGene00013984	WBGene00004457
WBGene00001732			WBGene00013351	WBGene00045063	WBGene00013985	WBGene00004458
WBGene00001740			WBGene00013353	WBGene00077696	WBGene00013994	WBGene00004460
WBGene00001743			WBGene00013359		WBGene00013997	WBGene00004461
WBGene00001744			WBGene00013440		WBGene00014001	WBGene00004462
WBGene00001745			WBGene00013443		WBGene00014018	WBGene00004463
WBGene00001746			WBGene00013477		WBGene00014034	WBGene00004464
WBGene00001747			WBGene00013480		WBGene00014051	WBGene00004465
WBGene00001748			WBGene00013486		WBGene00014058	WBGene00004466
WBGene00001749			WBGene00013487		WBGene00014066	WBGene00004467
WBGene00001750			WBGene00013489		WBGene00014075	WBGene00004468
WBGene00001751			WBGene00013493		WBGene00014076	WBGene00004470
WBGene00001752			WBGene00013507		WBGene00014115	WBGene00004471
WBGene00001753			WBGene00013513		WBGene00014139	WBGene00004472
WBGene00001754			WBGene00013534		WBGene00014151	WBGene00004473
WBGene00001755			WBGene00013581		WBGene00014153	WBGene00004474
WBGene00001756			WBGene00013583		WBGene00014170	WBGene00004475
WBGene00001757			WBGene00013594		WBGene00014174	WBGene00004476
WBGene00001758			WBGene00013603		WBGene00014210	WBGene00004477
WBGene00001759			WBGene00013604		WBGene00014222	WBGene00004478
WBGene00001760			WBGene00013607		WBGene00014224	WBGene00004479
WBGene00001761			WBGene00013608		WBGene00014230	WBGene00004480
WBGene00001762			WBGene00013609		WBGene00014232	WBGene00004481
WBGene00001763			WBGene00013646		WBGene00014256	WBGene00004482
WBGene00001764			WBGene00013655		WBGene00014261	WBGene00004483
WBGene00001765			WBGene00013672		WBGene00014697	WBGene00004484
WBGene00001766			WBGene00013692		WBGene00015001	WBGene00004485
WBGene00001767			WBGene00013700		WBGene00015021	WBGene00004486
WBGene00001768			WBGene00013715		WBGene00015029	WBGene00004487
WBGene00001769			WBGene00013730		WBGene00015047	WBGene00004488
WBGene00001770			WBGene00013782		WBGene00015048	WBGene00004489
WBGene00001771			WBGene00013807		WBGene00015052	WBGene00004491
WBGene00001772			WBGene00013846		WBGene00015054	WBGene00004492
WBGene00001773			WBGene00013849		WBGene00015055	WBGene00004494
WBGene00001774			WBGene00013866		WBGene00015092	WBGene00004495
WBGene00001775			WBGene00013896		WBGene00015104	WBGene00004496
WBGene00001776			WBGene00013900		WBGene00015124	WBGene00004498
WBGene00001777			WBGene00013901		WBGene00015135	WBGene00004501
WBGene00001778			WBGene00013904		WBGene00015164	WBGene00004502
WBGene00001779			WBGene00013905		WBGene00015177	WBGene00004503
WBGene00001780			WBGene00013906		WBGene00015188	WBGene00004504
WBGene00001781			WBGene00013958		WBGene00015194	WBGene00004505
WBGene00001782			WBGene00013967		WBGene00015203	WBGene00004506
WBGene00001783			WBGene00013970		WBGene00015232	WBGene00004507
WBGene00001784			WBGene00013973		WBGene00015248	WBGene00004679
WBGene00001785			WBGene00013999		WBGene00015249	WBGene00004682
WBGene00001786			WBGene00014020		WBGene00015251	WBGene00004700
WBGene00001787			WBGene00014035		WBGene00015270	WBGene00004703
WBGene00001789			WBGene00014053		WBGene00015293	WBGene00004704
WBGene00001790			WBGene00014078		WBGene00015298	WBGene00004705
WBGene00001791			WBGene00014093		WBGene00015308	WBGene00004706
WBGene00001792			WBGene00014117		WBGene00015356	WBGene00004727
WBGene00001793			WBGene00014137		WBGene00015359	WBGene00004728
WBGene00001794			WBGene00014138		WBGene00015360	WBGene00004729
WBGene00001795			WBGene00014152		WBGene00015454	WBGene00004735
WBGene00001796			WBGene00014161		WBGene00015460	WBGene00004736
WBGene00001808			WBGene00014213		WBGene00015485	WBGene00004738
WBGene00001811			WBGene00014233		WBGene00015486	WBGene00004740
WBGene00001812			WBGene00014236		WBGene00015509	WBGene00004743
WBGene00001813			WBGene00014241		WBGene00015516	WBGene00004744
WBGene00001814			WBGene00014300		WBGene00015554	WBGene00004752
WBGene00001815			WBGene00014864		WBGene00015579	WBGene00004753
WBGene00001816			WBGene00015019		WBGene00015581	WBGene00004754
WBGene00001817			WBGene00015040		WBGene00015592	WBGene00004755
WBGene00001818			WBGene00015041		WBGene00015623	WBGene00004756
WBGene00001819			WBGene00015042		WBGene00015662	WBGene00004758
WBGene00001823			WBGene00015043		WBGene00015676	WBGene00004759
WBGene00001824			WBGene00015044		WBGene00015697	WBGene00004760
WBGene00001827			WBGene00015045		WBGene00015735	WBGene00004766
WBGene00001829			WBGene00015049		WBGene00015742	WBGene00004767
WBGene00001830			WBGene00015057		WBGene00015744	WBGene00004769
WBGene00001833			WBGene00015073		WBGene00015746	WBGene00004774
WBGene00001834			WBGene00015110		WBGene00015752	WBGene00004777
WBGene00001836			WBGene00015111		WBGene00015777	WBGene00004781
WBGene00001837			WBGene00015114		WBGene00015779	WBGene00004782
WBGene00001840			WBGene00015126		WBGene00015794	WBGene00004787
WBGene00001843			WBGene00015131		WBGene00015802	WBGene00004788
WBGene00001844			WBGene00015145		WBGene00015806	WBGene00004789
WBGene00001851			WBGene00015198		WBGene00015815	WBGene00004790
WBGene00001852			WBGene00015258		WBGene00015866	WBGene00004800
WBGene00001853			WBGene00015260		WBGene00015887	WBGene00004801
WBGene00001854			WBGene00015268		WBGene00015926	WBGene00004802
WBGene00001855			WBGene00015278		WBGene00015934	WBGene00004806
WBGene00001856			WBGene00015285		WBGene00016014	WBGene00004807
WBGene00001857			WBGene00015295		WBGene00016019	WBGene00004808
WBGene00001860			WBGene00015307		WBGene00016029	WBGene00004829
WBGene00001862			WBGene00015324		WBGene00016073	WBGene00004830
WBGene00001863			WBGene00015330		WBGene00016092	WBGene00004831
WBGene00001865			WBGene00015332		WBGene00016106	WBGene00004854
WBGene00001869			WBGene00015338		WBGene00016112	WBGene00004855
WBGene00001872			WBGene00015361		WBGene00016113	WBGene00004856
WBGene00001875			WBGene00015387		WBGene00016123	WBGene00004873
WBGene00001876			WBGene00015388		WBGene00016150	WBGene00004875
WBGene00001877			WBGene00015389		WBGene00016151	WBGene00004878
WBGene00001878			WBGene00015399		WBGene00016166	WBGene00004880
WBGene00001879			WBGene00015400		WBGene00016170	WBGene00004882
WBGene00001880			WBGene00015403		WBGene00016174	WBGene00004888
WBGene00001881			WBGene00015412		WBGene00016185	WBGene00004891
WBGene00001882			WBGene00015457		WBGene00016192	WBGene00004892
WBGene00001883			WBGene00015458		WBGene00016204	WBGene00004895
WBGene00001884			WBGene00015466		WBGene00016207	WBGene00004896
WBGene00001885			WBGene00015471		WBGene00016209	WBGene00004897
WBGene00001886			WBGene00015472		WBGene00016245	WBGene00004910
WBGene00001887			WBGene00015487		WBGene00016249	WBGene00004912
WBGene00001888			WBGene00015510		WBGene00016250	WBGene00004913
WBGene00001889			WBGene00015532		WBGene00016260	WBGene00004914
WBGene00001890			WBGene00015535		WBGene00016283	WBGene00004916
WBGene00001891			WBGene00015559		WBGene00016316	WBGene00004917
WBGene00001892			WBGene00015565		WBGene00016323	WBGene00004918
WBGene00001893			WBGene00015567		WBGene00016328	WBGene00004919
WBGene00001894			WBGene00015639		WBGene00016344	WBGene00004920
WBGene00001895			WBGene00015641		WBGene00016391	WBGene00004921
WBGene00001896			WBGene00015642		WBGene00016395	WBGene00004927
WBGene00001898			WBGene00015649		WBGene00016397	WBGene00004929
WBGene00001899			WBGene00015651		WBGene00016400	WBGene00004930
WBGene00001900			WBGene00015660		WBGene00016407	WBGene00004931
WBGene00001901			WBGene00015680		WBGene00016408	WBGene00004932
WBGene00001902			WBGene00015689		WBGene00016442	WBGene00004947
WBGene00001903			WBGene00015691		WBGene00016448	WBGene00004951
WBGene00001904			WBGene00015692		WBGene00016452	WBGene00004959
WBGene00001905			WBGene00015694		WBGene00016489	WBGene00004969
WBGene00001906			WBGene00015695		WBGene00016490	WBGene00004975
WBGene00001907			WBGene00015700		WBGene00016524	WBGene00004980
WBGene00001908			WBGene00015716		WBGene00016540	WBGene00005007
WBGene00001909			WBGene00015739		WBGene00016562	WBGene00005014
WBGene00001911			WBGene00015807		WBGene00016602	WBGene00005015
WBGene00001912			WBGene00015841		WBGene00016603	WBGene00005019
WBGene00001913			WBGene00015855		WBGene00016642	WBGene00005020
WBGene00001915			WBGene00015861		WBGene00016655	WBGene00005021
WBGene00001916			WBGene00015867		WBGene00016678	WBGene00005022
WBGene00001917			WBGene00015871		WBGene00016704	WBGene00005023
WBGene00001918			WBGene00015894		WBGene00016725	WBGene00005025
WBGene00001919			WBGene00015957		WBGene00016739	WBGene00005026
WBGene00001920			WBGene00015965		WBGene00016751	WBGene00005077
WBGene00001921			WBGene00015975		WBGene00016754	WBGene00005078
WBGene00001922			WBGene00015982		WBGene00016792	WBGene00005662
WBGene00001923			WBGene00015994		WBGene00016848	WBGene00005663
WBGene00001924			WBGene00016006		WBGene00016879	WBGene00006059
WBGene00001925			WBGene00016013		WBGene00016888	WBGene00006061
WBGene00001926			WBGene00016022		WBGene00016902	WBGene00006062
WBGene00001927			WBGene00016024		WBGene00016906	WBGene00006307
WBGene00001928			WBGene00016032		WBGene00016907	WBGene00006308
WBGene00001929			WBGene00016037		WBGene00016918	WBGene00006309
WBGene00001930			WBGene00016063		WBGene00016920	WBGene00006318
WBGene00001931			WBGene00016064		WBGene00016957	WBGene00006321
WBGene00001932			WBGene00016088		WBGene00016977	WBGene00006349
WBGene00001933			WBGene00016093		WBGene00016983	WBGene00006351
WBGene00001934			WBGene00016094		WBGene00016989	WBGene00006352
WBGene00001935			WBGene00016095		WBGene00017014	WBGene00006359
WBGene00001936			WBGene00016104		WBGene00017025	WBGene00006364
WBGene00001937			WBGene00016120		WBGene00017037	WBGene00006367
WBGene00001938			WBGene00016135		WBGene00017044	WBGene00006368
WBGene00001939			WBGene00016152		WBGene00017054	WBGene00006369
WBGene00001940			WBGene00016153		WBGene00017082	WBGene00006373
WBGene00001941			WBGene00016160		WBGene00017088	WBGene00006382
WBGene00001942			WBGene00016190		WBGene00017103	WBGene00006383
WBGene00001943			WBGene00016191		WBGene00017122	WBGene00006386
WBGene00001944			WBGene00016247		WBGene00017137	WBGene00006387
WBGene00001945			WBGene00016294		WBGene00017166	WBGene00006388
WBGene00001946			WBGene00016300		WBGene00017169	WBGene00006389
WBGene00001948			WBGene00016306		WBGene00017210	WBGene00006397
WBGene00001949			WBGene00016327		WBGene00017238	WBGene00006405
WBGene00001950			WBGene00016335		WBGene00017311	WBGene00006410
WBGene00001952			WBGene00016340		WBGene00017312	WBGene00006414
WBGene00001953			WBGene00016343		WBGene00017320	WBGene00006415
WBGene00001954			WBGene00016348		WBGene00017326	WBGene00006416
WBGene00001955			WBGene00016354		WBGene00017373	WBGene00006424
WBGene00001957			WBGene00016373		WBGene00017381	WBGene00006432
WBGene00001958			WBGene00016389		WBGene00017389	WBGene00006433
WBGene00001959			WBGene00016393		WBGene00017430	WBGene00006434
WBGene00001960			WBGene00016413		WBGene00017532	WBGene00006437
WBGene00001961			WBGene00016423		WBGene00017546	WBGene00006439
WBGene00001971			WBGene00016427		WBGene00017547	WBGene00006442
WBGene00001972			WBGene00016431		WBGene00017557	WBGene00006443
WBGene00001973			WBGene00016435		WBGene00017592	WBGene00006446
WBGene00001974			WBGene00016443		WBGene00017594	WBGene00006447
WBGene00001975			WBGene00016450		WBGene00017640	WBGene00006448
WBGene00001978			WBGene00016451		WBGene00017642	WBGene00006461
WBGene00001979			WBGene00016499		WBGene00017687	WBGene00006465
WBGene00001980			WBGene00016558		WBGene00017702	WBGene00006467
WBGene00001983			WBGene00016566		WBGene00017733	WBGene00006470
WBGene00001985			WBGene00016577		WBGene00017738	WBGene00006472
WBGene00001993			WBGene00016613		WBGene00017765	WBGene00006473
WBGene00001994			WBGene00016661		WBGene00017769	WBGene00006474
WBGene00001995			WBGene00016698		WBGene00017771	WBGene00006477
WBGene00001996			WBGene00016705		WBGene00017799	WBGene00006478
WBGene00001997			WBGene00016721		WBGene00017818	WBGene00006479
WBGene00001998			WBGene00016728		WBGene00017914	WBGene00006481
WBGene00001999			WBGene00016747		WBGene00017920	WBGene00006483
WBGene00002000			WBGene00016762		WBGene00017924	WBGene00006490
WBGene00002001			WBGene00016764		WBGene00017928	WBGene00006491
WBGene00002002			WBGene00016769		WBGene00017936	WBGene00006493
WBGene00002003			WBGene00016786		WBGene00017945	WBGene00006494
WBGene00002004			WBGene00016794		WBGene00017971	WBGene00006497
WBGene00002005			WBGene00016798		WBGene00017973	WBGene00006503
WBGene00002007			WBGene00016801		WBGene00017974	WBGene00006510
WBGene00002008			WBGene00016841		WBGene00017975	WBGene00006512
WBGene00002010			WBGene00016865		WBGene00017981	WBGene00006515
WBGene00002011			WBGene00016868		WBGene00017988	WBGene00006518
WBGene00002012			WBGene00016903		WBGene00017996	WBGene00006520
WBGene00002013			WBGene00016912		WBGene00017999	WBGene00006525
WBGene00002015			WBGene00016933		WBGene00018017	WBGene00006526
WBGene00002016			WBGene00016944		WBGene00018036	WBGene00006527
WBGene00002017			WBGene00016951		WBGene00018037	WBGene00006538
WBGene00002018			WBGene00016970		WBGene00018042	WBGene00006542
WBGene00002019			WBGene00016974		WBGene00018051	WBGene00006543
WBGene00002020			WBGene00016991		WBGene00018060	WBGene00006563
WBGene00002021			WBGene00016996		WBGene00018138	WBGene00006565
WBGene00002023			WBGene00016997		WBGene00018149	WBGene00006566
WBGene00002024			WBGene00017026		WBGene00018160	WBGene00006567
WBGene00002025			WBGene00017034		WBGene00018161	WBGene00006568
WBGene00002026			WBGene00017064		WBGene00018174	WBGene00006573
WBGene00002027			WBGene00017065		WBGene00018181	WBGene00006575
WBGene00002028			WBGene00017069		WBGene00018187	WBGene00006578
WBGene00002029			WBGene00017083		WBGene00018213	WBGene00006579
WBGene00002030			WBGene00017098		WBGene00018218	WBGene00006590
WBGene00002031			WBGene00017108		WBGene00018239	WBGene00006594
WBGene00002032			WBGene00017120		WBGene00018240	WBGene00006595
WBGene00002033			WBGene00017135		WBGene00018283	WBGene00006596
WBGene00002035			WBGene00017140		WBGene00018317	WBGene00006598
WBGene00002036			WBGene00017157		WBGene00018319	WBGene00006599
WBGene00002037			WBGene00017176		WBGene00018328	WBGene00006606
WBGene00002038			WBGene00017184		WBGene00018330	WBGene00006607
WBGene00002039			WBGene00017195		WBGene00018340	WBGene00006612
WBGene00002040			WBGene00017219		WBGene00018370	WBGene00006613
WBGene00002041			WBGene00017240		WBGene00018373	WBGene00006615
WBGene00002042			WBGene00017277		WBGene00018393	WBGene00006617
WBGene00002043			WBGene00017279		WBGene00018398	WBGene00006626
WBGene00002044			WBGene00017285		WBGene00018402	WBGene00006633
WBGene00002045			WBGene00017314		WBGene00018409	WBGene00006634
WBGene00002046			WBGene00017315		WBGene00018424	WBGene00006638
WBGene00002047			WBGene00017329		WBGene00018426	WBGene00006647
WBGene00002048			WBGene00017331		WBGene00018431	WBGene00006648
WBGene00002050			WBGene00017332		WBGene00018512	WBGene00006654
WBGene00002051			WBGene00017333		WBGene00018519	WBGene00006655
WBGene00002052			WBGene00017336		WBGene00018586	WBGene00006669
WBGene00002053			WBGene00017344		WBGene00018609	WBGene00006696
WBGene00002054			WBGene00017364		WBGene00018656	WBGene00006697
WBGene00002055			WBGene00017369		WBGene00018672	WBGene00006698
WBGene00002056			WBGene00017375		WBGene00018674	WBGene00006699
WBGene00002057			WBGene00017387		WBGene00018700	WBGene00006700
WBGene00002058			WBGene00017388		WBGene00018719	WBGene00006701
WBGene00002059			WBGene00017394		WBGene00018723	WBGene00006702
WBGene00002060			WBGene00017427		WBGene00018737	WBGene00006703
WBGene00002061			WBGene00017428		WBGene00018738	WBGene00006707
WBGene00002062			WBGene00017443		WBGene00018739	WBGene00006708
WBGene00002063			WBGene00017449		WBGene00018762	WBGene00006709
WBGene00002064			WBGene00017487		WBGene00018776	WBGene00006711
WBGene00002065			WBGene00017508		WBGene00018784	WBGene00006713
WBGene00002066			WBGene00017513		WBGene00018788	WBGene00006715
WBGene00002069			WBGene00017515		WBGene00018798	WBGene00006720
WBGene00002070			WBGene00017535		WBGene00018835	WBGene00006724
WBGene00002071			WBGene00017543		WBGene00018847	WBGene00006728
WBGene00002073			WBGene00017544		WBGene00018897	WBGene00006729
WBGene00002074			WBGene00017565		WBGene00018898	WBGene00006730
WBGene00002075			WBGene00017571		WBGene00018901	WBGene00006733
WBGene00002076			WBGene00017576		WBGene00018984	WBGene00006734
WBGene00002077			WBGene00017580		WBGene00018990	WBGene00006742
WBGene00002078			WBGene00017598		WBGene00018995	WBGene00006743
WBGene00002079			WBGene00017601		WBGene00018998	WBGene00006745
WBGene00002080			WBGene00017638		WBGene00019004	WBGene00006746
WBGene00002081			WBGene00017648		WBGene00019068	WBGene00006750
WBGene00002083			WBGene00017671		WBGene00019074	WBGene00006751
WBGene00002146			WBGene00017678		WBGene00019108	WBGene00006755
WBGene00002147			WBGene00017690		WBGene00019109	WBGene00006756
WBGene00002149			WBGene00017709		WBGene00019125	WBGene00006757
WBGene00002150			WBGene00017710		WBGene00019126	WBGene00006761
WBGene00002151			WBGene00017711		WBGene00019196	WBGene00006762
WBGene00002152			WBGene00017723		WBGene00019204	WBGene00006763
WBGene00002153			WBGene00017735		WBGene00019219	WBGene00006766
WBGene00002162			WBGene00017770		WBGene00019220	WBGene00006767
WBGene00002169			WBGene00017800		WBGene00019240	WBGene00006768
WBGene00002173			WBGene00017814		WBGene00019245	WBGene00006771
WBGene00002174			WBGene00017861		WBGene00019257	WBGene00006772
WBGene00002175			WBGene00017865		WBGene00019259	WBGene00006776
WBGene00002176			WBGene00017876		WBGene00019275	WBGene00006780
WBGene00002177			WBGene00017879		WBGene00019277	WBGene00006781
WBGene00002178			WBGene00017881		WBGene00019295	WBGene00006783
WBGene00002179			WBGene00017886		WBGene00019298	WBGene00006785
WBGene00002180			WBGene00017916		WBGene00019347	WBGene00006786
WBGene00002181			WBGene00017937		WBGene00019365	WBGene00006787
WBGene00002182			WBGene00017948		WBGene00019395	WBGene00006788
WBGene00002183			WBGene00017959		WBGene00019403	WBGene00006789
WBGene00002184			WBGene00017968		WBGene00019424	WBGene00006790
WBGene00002185			WBGene00017969		WBGene00019457	WBGene00006793
WBGene00002189			WBGene00017982		WBGene00019460	WBGene00006795
WBGene00002190			WBGene00018000		WBGene00019481	WBGene00006796
WBGene00002191			WBGene00018016		WBGene00019487	WBGene00006798
WBGene00002192			WBGene00018024		WBGene00019510	WBGene00006803
WBGene00002196			WBGene00018034		WBGene00019536	WBGene00006805
WBGene00002198			WBGene00018035		WBGene00019537	WBGene00006807
WBGene00002199			WBGene00018067		WBGene00019544	WBGene00006808
WBGene00002200			WBGene00018071		WBGene00019604	WBGene00006809
WBGene00002201			WBGene00018074		WBGene00019609	WBGene00006810
WBGene00002202			WBGene00018105		WBGene00019616	WBGene00006817
WBGene00002203			WBGene00018151		WBGene00019620	WBGene00006818
WBGene00002205			WBGene00018209		WBGene00019624	WBGene00006822
WBGene00002207			WBGene00018210		WBGene00019628	WBGene00006823
WBGene00002211			WBGene00018214		WBGene00019658	WBGene00006826
WBGene00002213			WBGene00018215		WBGene00019682	WBGene00006829
WBGene00002214			WBGene00018246		WBGene00019693	WBGene00006830
WBGene00002215			WBGene00018301		WBGene00019770	WBGene00006831
WBGene00002216			WBGene00018318		WBGene00019800	WBGene00006833
WBGene00002217			WBGene00018350		WBGene00019806	WBGene00006836
WBGene00002218			WBGene00018358		WBGene00019819	WBGene00006839
WBGene00002219			WBGene00018361		WBGene00019820	WBGene00006840
WBGene00002220			WBGene00018365		WBGene00019832	WBGene00006843
WBGene00002222			WBGene00018376		WBGene00019867	WBGene00006853
WBGene00002223			WBGene00018384		WBGene00019890	WBGene00006856
WBGene00002225			WBGene00018385		WBGene00019893	WBGene00006862
WBGene00002226			WBGene00018392		WBGene00019962	WBGene00006863
WBGene00002227			WBGene00018403		WBGene00019979	WBGene00006870
WBGene00002228			WBGene00018405		WBGene00020004	WBGene00006876
WBGene00002229			WBGene00018417		WBGene00020018	WBGene00006887
WBGene00002230			WBGene00018433		WBGene00020088	WBGene00006889
WBGene00002232			WBGene00018468		WBGene00020092	WBGene00006890
WBGene00002233			WBGene00018478		WBGene00020096	WBGene00006910
WBGene00002235			WBGene00018479		WBGene00020097	WBGene00006913
WBGene00002238			WBGene00018480		WBGene00020107	WBGene00006917
WBGene00002239			WBGene00018481		WBGene00020112	WBGene00006918
WBGene00002242			WBGene00018504		WBGene00020139	WBGene00006919
WBGene00002243			WBGene00018516		WBGene00020146	WBGene00006921
WBGene00002244			WBGene00018531		WBGene00020168	WBGene00006923
WBGene00002245			WBGene00018543		WBGene00020181	WBGene00006931
WBGene00002247			WBGene00018547		WBGene00020190	WBGene00006932
WBGene00002248			WBGene00018594		WBGene00020191	WBGene00006933
WBGene00002249			WBGene00018692		WBGene00020230	WBGene00006934
WBGene00002251			WBGene00018696		WBGene00020235	WBGene00006936
WBGene00002252			WBGene00018706		WBGene00020246	WBGene00006937
WBGene00002257			WBGene00018710		WBGene00020251	WBGene00006944
WBGene00002258			WBGene00018716		WBGene00020254	WBGene00006945
WBGene00002259			WBGene00018741		WBGene00020256	WBGene00006946
WBGene00002260			WBGene00018763		WBGene00020258	WBGene00006957
WBGene00002261			WBGene00018779		WBGene00020262	WBGene00006958
WBGene00002262			WBGene00018781		WBGene00020266	WBGene00006960
WBGene00002263			WBGene00018783		WBGene00020273	WBGene00006963
WBGene00002264			WBGene00018851		WBGene00020281	WBGene00006964
WBGene00002265			WBGene00018867		WBGene00020295	WBGene00006968
WBGene00002266			WBGene00018886		WBGene00020322	WBGene00006974
WBGene00002267			WBGene00018906		WBGene00020334	WBGene00006987
WBGene00002268			WBGene00018926		WBGene00020374	WBGene00006993
WBGene00002269			WBGene00018930		WBGene00020382	WBGene00006994
WBGene00002270			WBGene00018949		WBGene00020389	WBGene00006996
WBGene00002271			WBGene00018982		WBGene00020402	WBGene00006997
WBGene00002272			WBGene00018987		WBGene00020426	WBGene00007000
WBGene00002273			WBGene00018997		WBGene00020446	WBGene00007007
WBGene00002275			WBGene00019055		WBGene00020490	WBGene00007008
WBGene00002276			WBGene00019069		WBGene00020601	WBGene00007009
WBGene00002278			WBGene00019079		WBGene00020604	WBGene00007010
WBGene00002280			WBGene00019085		WBGene00020612	WBGene00007013
WBGene00002282			WBGene00019094		WBGene00020613	WBGene00007014
WBGene00002295			WBGene00019104		WBGene00020625	WBGene00007018
WBGene00002297			WBGene00019105		WBGene00020658	WBGene00007020
WBGene00002299			WBGene00019146		WBGene00020683	WBGene00007021
WBGene00002324			WBGene00019151		WBGene00020742	WBGene00007026
WBGene00002335			WBGene00019227		WBGene00020757	WBGene00007028
WBGene00002344			WBGene00019229		WBGene00020782	WBGene00007029
WBGene00002348			WBGene00019232		WBGene00020810	WBGene00007030
WBGene00002363			WBGene00019233		WBGene00020820	WBGene00007036
WBGene00002497			WBGene00019234		WBGene00020821	WBGene00007042
WBGene00002583			WBGene00019235		WBGene00020825	WBGene00007045
WBGene00002601			WBGene00019248		WBGene00020837	WBGene00007048
WBGene00002632			WBGene00019249		WBGene00020838	WBGene00007050
WBGene00002637			WBGene00019270		WBGene00020839	WBGene00007053
WBGene00002694			WBGene00019272		WBGene00020866	WBGene00007054
WBGene00002696			WBGene00019274		WBGene00020868	WBGene00007055
WBGene00002717			WBGene00019284		WBGene00020924	WBGene00007056
WBGene00002783			WBGene00019314		WBGene00020933	WBGene00007057
WBGene00002804			WBGene00019317		WBGene00020937	WBGene00007059
WBGene00002827			WBGene00019344		WBGene00020953	WBGene00007099
WBGene00002845			WBGene00019346		WBGene00020955	WBGene00007102
WBGene00002850			WBGene00019352		WBGene00020964	WBGene00007103
WBGene00002855			WBGene00019362		WBGene00021009	WBGene00007105
WBGene00002879			WBGene00019376		WBGene00021058	WBGene00007106
WBGene00002881			WBGene00019379		WBGene00021059	WBGene00007110
WBGene00002889			WBGene00019380		WBGene00021061	WBGene00007111
WBGene00002891			WBGene00019407		WBGene00021088	WBGene00007114
WBGene00002915			WBGene00019408		WBGene00021128	WBGene00007117
WBGene00002957			WBGene00019461		WBGene00021132	WBGene00007122
WBGene00002974			WBGene00019470		WBGene00021133	WBGene00007128
WBGene00002976			WBGene00019471		WBGene00021152	WBGene00007129
WBGene00002978			WBGene00019472		WBGene00021159	WBGene00007135
WBGene00002979			WBGene00019473		WBGene00021176	WBGene00007137
WBGene00002980			WBGene00019479		WBGene00021213	WBGene00007143
WBGene00002981			WBGene00019489		WBGene00021215	WBGene00007144
WBGene00002982			WBGene00019509		WBGene00021276	WBGene00007145
WBGene00002985			WBGene00019515		WBGene00021311	WBGene00007150
WBGene00002986			WBGene00019516		WBGene00021316	WBGene00007167
WBGene00002987			WBGene00019546		WBGene00021327	WBGene00007174
WBGene00002988			WBGene00019565		WBGene00021331	WBGene00007175
WBGene00002989			WBGene00019590		WBGene00021346	WBGene00007184
WBGene00002990			WBGene00019600		WBGene00021349	WBGene00007188
WBGene00002991			WBGene00019605		WBGene00021354	WBGene00007189
WBGene00002996			WBGene00019606		WBGene00021363	WBGene00007194
WBGene00002998			WBGene00019608		WBGene00021423	WBGene00007197
WBGene00002999			WBGene00019619		WBGene00021427	WBGene00007201
WBGene00003000			WBGene00019649		WBGene00021461	WBGene00007210
WBGene00003001			WBGene00019677		WBGene00021466	WBGene00007216
WBGene00003002			WBGene00019717		WBGene00021474	WBGene00007217
WBGene00003007			WBGene00019751		WBGene00021475	WBGene00007226
WBGene00003008			WBGene00019756		WBGene00021482	WBGene00007234
WBGene00003009			WBGene00019757		WBGene00021486	WBGene00007235
WBGene00003014			WBGene00019779		WBGene00021487	WBGene00007236
WBGene00003015			WBGene00019801		WBGene00021491	WBGene00007237
WBGene00003017			WBGene00019814		WBGene00021492	WBGene00007256
WBGene00003018			WBGene00019815		WBGene00021494	WBGene00007267
WBGene00003020			WBGene00019842		WBGene00021515	WBGene00007277
WBGene00003024			WBGene00019844		WBGene00021528	WBGene00007287
WBGene00003025			WBGene00019884		WBGene00021536	WBGene00007302
WBGene00003026			WBGene00019899		WBGene00021551	WBGene00007330
WBGene00003030			WBGene00019901		WBGene00021555	WBGene00007350
WBGene00003031			WBGene00019917		WBGene00021597	WBGene00007352
WBGene00003033			WBGene00019919		WBGene00021661	WBGene00007355
WBGene00003034			WBGene00019920		WBGene00021715	WBGene00007387
WBGene00003035			WBGene00019928		WBGene00021733	WBGene00007388
WBGene00003036			WBGene00019977		WBGene00021741	WBGene00007400
WBGene00003037			WBGene00020003		WBGene00021752	WBGene00007409
WBGene00003040			WBGene00020012		WBGene00021789	WBGene00007412
WBGene00003041			WBGene00020035		WBGene00021813	WBGene00007413
WBGene00003043			WBGene00020048		WBGene00021814	WBGene00007419
WBGene00003047			WBGene00020070		WBGene00021815	WBGene00007428
WBGene00003048			WBGene00020089		WBGene00021816	WBGene00007429
WBGene00003052			WBGene00020106		WBGene00021818	WBGene00007435
WBGene00003055			WBGene00020111		WBGene00021829	WBGene00007438
WBGene00003057			WBGene00020130		WBGene00021831	WBGene00007444
WBGene00003058			WBGene00020149		WBGene00021842	WBGene00007446
WBGene00003059			WBGene00020151		WBGene00021867	WBGene00007463
WBGene00003060			WBGene00020154		WBGene00021870	WBGene00007500
WBGene00003061			WBGene00020179		WBGene00021882	WBGene00007505
WBGene00003062			WBGene00020220		WBGene00021893	WBGene00007514
WBGene00003063			WBGene00020236		WBGene00021901	WBGene00007528
WBGene00003064			WBGene00020263		WBGene00021902	WBGene00007531
WBGene00003066			WBGene00020287		WBGene00021904	WBGene00007534
WBGene00003068			WBGene00020289		WBGene00021914	WBGene00007548
WBGene00003071			WBGene00020300		WBGene00021929	WBGene00007549
WBGene00003072			WBGene00020327		WBGene00021932	WBGene00007554
WBGene00003073			WBGene00020328		WBGene00021948	WBGene00007555
WBGene00003074			WBGene00020330		WBGene00021960	WBGene00007556
WBGene00003076			WBGene00020369		WBGene00021963	WBGene00007561
WBGene00003077			WBGene00020380		WBGene00022019	WBGene00007564
WBGene00003078			WBGene00020386		WBGene00022043	WBGene00007576
WBGene00003079			WBGene00020419		WBGene00022045	WBGene00007581
WBGene00003080			WBGene00020425		WBGene00022076	WBGene00007593
WBGene00003081			WBGene00020442		WBGene00022092	WBGene00007595
WBGene00003082			WBGene00020485		WBGene00022128	WBGene00007606
WBGene00003084			WBGene00020496		WBGene00022129	WBGene00007617
WBGene00003085			WBGene00020503		WBGene00022130	WBGene00007620
WBGene00003086			WBGene00020504		WBGene00022141	WBGene00007621
WBGene00003087			WBGene00020563		WBGene00022158	WBGene00007622
WBGene00003089			WBGene00020575		WBGene00022162	WBGene00007623
WBGene00003102			WBGene00020587		WBGene00022167	WBGene00007626
WBGene00003106			WBGene00020592		WBGene00022172	WBGene00007627
WBGene00003107			WBGene00020593		WBGene00022175	WBGene00007628
WBGene00003111			WBGene00020594		WBGene00022188	WBGene00007630
WBGene00003112			WBGene00020631		WBGene00022192	WBGene00007646
WBGene00003119			WBGene00020651		WBGene00022199	WBGene00007664
WBGene00003123			WBGene00020652		WBGene00022242	WBGene00007666
WBGene00003124			WBGene00020659		WBGene00022251	WBGene00007683
WBGene00003129			WBGene00020673		WBGene00022256	WBGene00007686
WBGene00003130			WBGene00020674		WBGene00022271	WBGene00007694
WBGene00003132			WBGene00020681		WBGene00022273	WBGene00007696
WBGene00003133			WBGene00020693		WBGene00022296	WBGene00007703
WBGene00003134			WBGene00020702		WBGene00022361	WBGene00007705
WBGene00003136			WBGene00020727		WBGene00022372	WBGene00007706
WBGene00003142			WBGene00020767		WBGene00022401	WBGene00007707
WBGene00003143			WBGene00020800		WBGene00022402	WBGene00007712
WBGene00003144			WBGene00020823		WBGene00022420	WBGene00007718
WBGene00003148			WBGene00020840		WBGene00022435	WBGene00007730
WBGene00003149			WBGene00020847		WBGene00022456	WBGene00007753
WBGene00003150			WBGene00020895		WBGene00022460	WBGene00007755
WBGene00003151			WBGene00020908		WBGene00022463	WBGene00007787
WBGene00003153			WBGene00020927		WBGene00022465	WBGene00007799
WBGene00003154			WBGene00020961		WBGene00022498	WBGene00007801
WBGene00003155			WBGene00020970		WBGene00022518	WBGene00007812
WBGene00003156			WBGene00021011		WBGene00022519	WBGene00007836
WBGene00003157			WBGene00021021		WBGene00022531	WBGene00007857
WBGene00003158			WBGene00021070		WBGene00022536	WBGene00007860
WBGene00003159			WBGene00021072		WBGene00022593	WBGene00007878
WBGene00003161			WBGene00021075		WBGene00022599	WBGene00007882
WBGene00003162			WBGene00021110		WBGene00022610	WBGene00007886
WBGene00003163			WBGene00021125		WBGene00022616	WBGene00007912
WBGene00003164			WBGene00021214		WBGene00022646	WBGene00007917
WBGene00003166			WBGene00021221		WBGene00022664	WBGene00007918
WBGene00003168			WBGene00021237		WBGene00022673	WBGene00007922
WBGene00003170			WBGene00021238		WBGene00022694	WBGene00007924
WBGene00003171			WBGene00021260		WBGene00022721	WBGene00007927
WBGene00003172			WBGene00021305		WBGene00022727	WBGene00007941
WBGene00003174			WBGene00021323		WBGene00022733	WBGene00007942
WBGene00003175			WBGene00021338		WBGene00022738	WBGene00007952
WBGene00003177			WBGene00021343		WBGene00022759	WBGene00007953
WBGene00003178			WBGene00021345		WBGene00022792	WBGene00007959
WBGene00003182			WBGene00021348		WBGene00022797	WBGene00007969
WBGene00003183			WBGene00021353		WBGene00022815	WBGene00007971
WBGene00003185			WBGene00021367		WBGene00022832	WBGene00007972
WBGene00003186			WBGene00021372		WBGene00022836	WBGene00007974
WBGene00003196			WBGene00021391		WBGene00022851	WBGene00007980
WBGene00003209			WBGene00021403		WBGene00022853	WBGene00007982
WBGene00003210			WBGene00021407		WBGene00023422	WBGene00007983
WBGene00003214			WBGene00021437		WBGene00043705	WBGene00007993
WBGene00003220			WBGene00021448		WBGene00044144	WBGene00008006
WBGene00003222			WBGene00021460		WBGene00044233	WBGene00008019
WBGene00003224			WBGene00021464		WBGene00044236	WBGene00008033
WBGene00003225			WBGene00021503		WBGene00044325	WBGene00008041
WBGene00003229			WBGene00021535		WBGene00044423	WBGene00008052
WBGene00003232			WBGene00021548		WBGene00044440	WBGene00008053
WBGene00003233			WBGene00021552		WBGene00044604	WBGene00008078
WBGene00003234			WBGene00021553		WBGene00044609	WBGene00008117
WBGene00003235			WBGene00021594		WBGene00044614	WBGene00008119
WBGene00003236			WBGene00021615		WBGene00044689	WBGene00008121
WBGene00003239			WBGene00021639		WBGene00044734	WBGene00008122
WBGene00003241			WBGene00021640		WBGene00044738	WBGene00008131
WBGene00003242			WBGene00021646		WBGene00044924	WBGene00008132
WBGene00003243			WBGene00021647		WBGene00044989	WBGene00008133
WBGene00003246			WBGene00021662		WBGene00077500	WBGene00008136
WBGene00003247			WBGene00021679		WBGene00077521	WBGene00008143
WBGene00003253			WBGene00021689		WBGene00077771	WBGene00008151
WBGene00003254			WBGene00021691		WBGene00086566	WBGene00008164
WBGene00003258			WBGene00021692			WBGene00008165
WBGene00003367			WBGene00021745			WBGene00008167
WBGene00003368			WBGene00021750			WBGene00008205
WBGene00003369			WBGene00021751			WBGene00008218
WBGene00003370			WBGene00021759			WBGene00008225
WBGene00003371			WBGene00021766			WBGene00008236
WBGene00003372			WBGene00021785			WBGene00008237
WBGene00003373			WBGene00021787			WBGene00008239
WBGene00003374			WBGene00021839			WBGene00008258
WBGene00003375			WBGene00021846			WBGene00008263
WBGene00003376			WBGene00021877			WBGene00008273
WBGene00003377			WBGene00021913			WBGene00008288
WBGene00003378			WBGene00021935			WBGene00008311
WBGene00003384			WBGene00021939			WBGene00008320
WBGene00003385			WBGene00021943			WBGene00008331
WBGene00003387			WBGene00021984			WBGene00008338
WBGene00003388			WBGene00022004			WBGene00008339
WBGene00003389			WBGene00022006			WBGene00008345
WBGene00003390			WBGene00022007			WBGene00008354
WBGene00003391			WBGene00022014			WBGene00008362
WBGene00003392			WBGene00022026			WBGene00008364
WBGene00003393			WBGene00022030			WBGene00008366
WBGene00003394			WBGene00022048			WBGene00008370
WBGene00003395			WBGene00022101			WBGene00008371
WBGene00003396			WBGene00022103			WBGene00008379
WBGene00003397			WBGene00022114			WBGene00008380
WBGene00003400			WBGene00022168			WBGene00008386
WBGene00003401			WBGene00022181			WBGene00008398
WBGene00003402			WBGene00022189			WBGene00008402
WBGene00003404			WBGene00022203			WBGene00008405
WBGene00003405			WBGene00022219			WBGene00008408
WBGene00003406			WBGene00022236			WBGene00008410
WBGene00003407			WBGene00022247			WBGene00008411
WBGene00003408			WBGene00022250			WBGene00008414
WBGene00003409			WBGene00022257			WBGene00008415
WBGene00003410			WBGene00022261			WBGene00008422
WBGene00003411			WBGene00022278			WBGene00008425
WBGene00003412			WBGene00022286			WBGene00008431
WBGene00003413			WBGene00022295			WBGene00008439
WBGene00003414			WBGene00022300			WBGene00008452
WBGene00003415			WBGene00022307			WBGene00008455
WBGene00003417			WBGene00022367			WBGene00008456
WBGene00003418			WBGene00022397			WBGene00008480
WBGene00003421			WBGene00022427			WBGene00008502
WBGene00003422			WBGene00022429			WBGene00008505
WBGene00003423			WBGene00022467			WBGene00008514
WBGene00003472			WBGene00022489			WBGene00008531
WBGene00003475			WBGene00022511			WBGene00008532
WBGene00003476			WBGene00022532			WBGene00008538
WBGene00003477			WBGene00022538			WBGene00008546
WBGene00003478			WBGene00022554			WBGene00008564
WBGene00003479			WBGene00022565			WBGene00008566
WBGene00003480			WBGene00022566			WBGene00008567
WBGene00003482			WBGene00022569			WBGene00008570
WBGene00003485			WBGene00022575			WBGene00008571
WBGene00003495			WBGene00022579			WBGene00008585
WBGene00003497			WBGene00022587			WBGene00008586
WBGene00003499			WBGene00022592			WBGene00008606
WBGene00003504			WBGene00022613			WBGene00008639
WBGene00003507			WBGene00022615			WBGene00008641
WBGene00003509			WBGene00022641			WBGene00008642
WBGene00003510			WBGene00022643			WBGene00008643
WBGene00003511			WBGene00022647			WBGene00008645
WBGene00003514			WBGene00022672			WBGene00008646
WBGene00003515			WBGene00022682			WBGene00008654
WBGene00003516			WBGene00022741			WBGene00008664
WBGene00003517			WBGene00022743			WBGene00008666
WBGene00003518			WBGene00022750			WBGene00008670
WBGene00003519			WBGene00022770			WBGene00008682
WBGene00003520			WBGene00022783			WBGene00008684
WBGene00003521			WBGene00022789			WBGene00008685
WBGene00003522			WBGene00022835			WBGene00008686
WBGene00003523			WBGene00022854			WBGene00008687
WBGene00003524			WBGene00022866			WBGene00008688
WBGene00003525			WBGene00022867			WBGene00008693
WBGene00003526			WBGene00022868			WBGene00008706
WBGene00003527			WBGene00022870			WBGene00008729
WBGene00003531			WBGene00022871			WBGene00008733
WBGene00003532			WBGene00022872			WBGene00008741
WBGene00003555			WBGene00022873			WBGene00008765
WBGene00003558			WBGene00022881			WBGene00008766
WBGene00003559			WBGene00022887			WBGene00008767
WBGene00003561			WBGene00023409			WBGene00008769
WBGene00003562			WBGene00023423			WBGene00008774
WBGene00003563			WBGene00023491			WBGene00008775
WBGene00003564			WBGene00043066			WBGene00008781
WBGene00003566			WBGene00044004			WBGene00008800
WBGene00003567			WBGene00044044			WBGene00008806
WBGene00003568			WBGene00044067			WBGene00008809
WBGene00003569			WBGene00044068			WBGene00008810
WBGene00003570			WBGene00044078			WBGene00008852
WBGene00003571			WBGene00044235			WBGene00008856
WBGene00003572			WBGene00044260			WBGene00008876
WBGene00003573			WBGene00044286			WBGene00008877
WBGene00003574			WBGene00044302			WBGene00008919
WBGene00003575			WBGene00044322			WBGene00008920
WBGene00003576			WBGene00044330			WBGene00008921
WBGene00003578			WBGene00044331			WBGene00008924
WBGene00003579			WBGene00044332			WBGene00008927
WBGene00003580			WBGene00044344			WBGene00008939
WBGene00003581			WBGene00044355			WBGene00008956
WBGene00003582			WBGene00044386			WBGene00008974
WBGene00003583			WBGene00044468			WBGene00008979
WBGene00003584			WBGene00044528			WBGene00008992
WBGene00003585			WBGene00044568			WBGene00008999
WBGene00003586			WBGene00044612			WBGene00009002
WBGene00003587			WBGene00044620			WBGene00009004
WBGene00003588			WBGene00044623			WBGene00009006
WBGene00003589			WBGene00044651			WBGene00009007
WBGene00003590			WBGene00044674			WBGene00009010
WBGene00003591			WBGene00044705			WBGene00009012
WBGene00003592			WBGene00044760			WBGene00009023
WBGene00003593			WBGene00044790			WBGene00009035
WBGene00003594			WBGene00044791			WBGene00009045
WBGene00003595			WBGene00044903			WBGene00009048
WBGene00003596			WBGene00045103			WBGene00009049
WBGene00003597			WBGene00045237			WBGene00009050
WBGene00003599			WBGene00045379			WBGene00009065
WBGene00003605			WBGene00045407			WBGene00009082
WBGene00003607			WBGene00045419			WBGene00009084
WBGene00003613			WBGene00045433			WBGene00009092
WBGene00003622			WBGene00045459			WBGene00009100
WBGene00003623			WBGene00045484			WBGene00009103
WBGene00003628			WBGene00077655			WBGene00009116
WBGene00003639			WBGene00077680			WBGene00009119
WBGene00003654			WBGene00077712			WBGene00009120
WBGene00003657			WBGene00077763			WBGene00009122
WBGene00003659						WBGene00009123
WBGene00003675						WBGene00009124
WBGene00003681						WBGene00009131
WBGene00003729						WBGene00009138
WBGene00003730						WBGene00009140
WBGene00003731						WBGene00009145
WBGene00003732						WBGene00009155
WBGene00003733						WBGene00009158
WBGene00003734						WBGene00009163
WBGene00003735						WBGene00009164
WBGene00003736						WBGene00009172
WBGene00003738						WBGene00009174
WBGene00003772						WBGene00009176
WBGene00003773						WBGene00009177
WBGene00003774						WBGene00009187
WBGene00003775						WBGene00009189
WBGene00003776						WBGene00009191
WBGene00003777						WBGene00009200
WBGene00003778						WBGene00009201
WBGene00003779						WBGene00009207
WBGene00003785						WBGene00009211
WBGene00003787						WBGene00009218
WBGene00003788						WBGene00009232
WBGene00003789						WBGene00009246
WBGene00003790						WBGene00009258
WBGene00003792						WBGene00009260
WBGene00003793						WBGene00009262
WBGene00003794						WBGene00009264
WBGene00003795						WBGene00009266
WBGene00003796						WBGene00009277
WBGene00003797						WBGene00009285
WBGene00003798						WBGene00009287
WBGene00003799						WBGene00009289
WBGene00003800						WBGene00009290
WBGene00003801						WBGene00009305
WBGene00003802						WBGene00009319
WBGene00003803						WBGene00009320
WBGene00003804						WBGene00009322
WBGene00003805						WBGene00009334
WBGene00003806						WBGene00009335
WBGene00003807						WBGene00009336
WBGene00003808						WBGene00009342
WBGene00003815						WBGene00009352
WBGene00003816						WBGene00009354
WBGene00003818						WBGene00009366
WBGene00003821						WBGene00009367
WBGene00003822						WBGene00009368
WBGene00003825						WBGene00009369
WBGene00003826						WBGene00009372
WBGene00003827						WBGene00009436
WBGene00003828						WBGene00009439
WBGene00003829						WBGene00009440
WBGene00003830						WBGene00009452
WBGene00003831						WBGene00009460
WBGene00003834						WBGene00009478
WBGene00003835						WBGene00009479
WBGene00003836						WBGene00009498
WBGene00003838						WBGene00009503
WBGene00003839						WBGene00009514
WBGene00003840						WBGene00009521
WBGene00003841						WBGene00009531
WBGene00003842						WBGene00009542
WBGene00003843						WBGene00009552
WBGene00003844						WBGene00009554
WBGene00003846						WBGene00009557
WBGene00003847						WBGene00009559
WBGene00003850						WBGene00009563
WBGene00003851						WBGene00009574
WBGene00003858						WBGene00009575
WBGene00003862						WBGene00009580
WBGene00003863						WBGene00009583
WBGene00003864						WBGene00009617
WBGene00003865						WBGene00009618
WBGene00003870						WBGene00009619
WBGene00003876						WBGene00009628
WBGene00003877						WBGene00009632
WBGene00003878						WBGene00009647
WBGene00003882						WBGene00009658
WBGene00003883						WBGene00009664
WBGene00003884						WBGene00009666
WBGene00003885						WBGene00009668
WBGene00003886						WBGene00009671
WBGene00003889						WBGene00009672
WBGene00003892						WBGene00009674
WBGene00003893						WBGene00009681
WBGene00003898						WBGene00009686
WBGene00003901						WBGene00009711
WBGene00003902						WBGene00009726
WBGene00003903						WBGene00009732
WBGene00003904						WBGene00009734
WBGene00003905						WBGene00009736
WBGene00003906						WBGene00009738
WBGene00003907						WBGene00009769
WBGene00003909						WBGene00009771
WBGene00003911						WBGene00009772
WBGene00003912						WBGene00009776
WBGene00003914						WBGene00009783
WBGene00003915						WBGene00009811
WBGene00003916						WBGene00009812
WBGene00003918						WBGene00009813
WBGene00003919						WBGene00009829
WBGene00003920						WBGene00009867
WBGene00003921						WBGene00009885
WBGene00003922						WBGene00009902
WBGene00003923						WBGene00009903
WBGene00003924						WBGene00009908
WBGene00003925						WBGene00009918
WBGene00003926						WBGene00009919
WBGene00003927						WBGene00009920
WBGene00003928						WBGene00009925
WBGene00003929						WBGene00009944
WBGene00003930						WBGene00009947
WBGene00003931						WBGene00009966
WBGene00003932						WBGene00009973
WBGene00003937						WBGene00009976
WBGene00003938						WBGene00009978
WBGene00003939						WBGene00009987
WBGene00003941						WBGene00009992
WBGene00003943						WBGene00009996
WBGene00003947						WBGene00010015
WBGene00003948						WBGene00010035
WBGene00003949						WBGene00010038
WBGene00003950						WBGene00010040
WBGene00003951						WBGene00010042
WBGene00003952						WBGene00010044
WBGene00003953						WBGene00010052
WBGene00003954						WBGene00010054
WBGene00003955						WBGene00010055
WBGene00003956						WBGene00010056
WBGene00003957						WBGene00010083
WBGene00003958						WBGene00010089
WBGene00003959						WBGene00010094
WBGene00003961						WBGene00010097
WBGene00003962						WBGene00010111
WBGene00003963						WBGene00010115
WBGene00003964						WBGene00010117
WBGene00003965						WBGene00010130
WBGene00003966						WBGene00010131
WBGene00003967						WBGene00010138
WBGene00003969						WBGene00010160
WBGene00003970						WBGene00010166
WBGene00003975						WBGene00010178
WBGene00003976						WBGene00010197
WBGene00003978						WBGene00010214
WBGene00003980						WBGene00010232
WBGene00003982						WBGene00010233
WBGene00003986						WBGene00010260
WBGene00003989						WBGene00010272
WBGene00003991						WBGene00010279
WBGene00003995						WBGene00010283
WBGene00003996						WBGene00010284
WBGene00003997						WBGene00010303
WBGene00003998						WBGene00010304
WBGene00003999						WBGene00010308
WBGene00004000						WBGene00010317
WBGene00004001						WBGene00010325
WBGene00004002						WBGene00010326
WBGene00004003						WBGene00010333
WBGene00004004						WBGene00010336
WBGene00004005						WBGene00010354
WBGene00004006						WBGene00010369
WBGene00004007						WBGene00010374
WBGene00004008						WBGene00010386
WBGene00004011						WBGene00010397
WBGene00004013						WBGene00010405
WBGene00004014						WBGene00010406
WBGene00004015						WBGene00010408
WBGene00004016						WBGene00010419
WBGene00004017						WBGene00010420
WBGene00004020						WBGene00010425
WBGene00004023						WBGene00010428
WBGene00004024						WBGene00010435
WBGene00004025						WBGene00010436
WBGene00004028						WBGene00010437
WBGene00004029						WBGene00010444
WBGene00004031						WBGene00010450
WBGene00004032						WBGene00010459
WBGene00004033						WBGene00010478
WBGene00004034						WBGene00010481
WBGene00004035						WBGene00010484
WBGene00004036						WBGene00010485
WBGene00004038						WBGene00010496
WBGene00004039						WBGene00010500
WBGene00004040						WBGene00010537
WBGene00004042						WBGene00010540
WBGene00004043						WBGene00010556
WBGene00004044						WBGene00010560
WBGene00004045						WBGene00010564
WBGene00004046						WBGene00010565
WBGene00004047						WBGene00010589
WBGene00004048						WBGene00010595
WBGene00004049						WBGene00010615
WBGene00004051						WBGene00010620
WBGene00004052						WBGene00010622
WBGene00004055						WBGene00010627
WBGene00004056						WBGene00010628
WBGene00004057						WBGene00010629
WBGene00004058						WBGene00010639
WBGene00004059						WBGene00010664
WBGene00004060						WBGene00010665
WBGene00004061						WBGene00010670
WBGene00004062						WBGene00010676
WBGene00004063						WBGene00010685
WBGene00004064						WBGene00010697
WBGene00004068						WBGene00010699
WBGene00004075						WBGene00010701
WBGene00004076						WBGene00010703
WBGene00004077						WBGene00010713
WBGene00004083						WBGene00010720
WBGene00004085						WBGene00010721
WBGene00004086						WBGene00010725
WBGene00004087						WBGene00010734
WBGene00004088						WBGene00010736
WBGene00004089						WBGene00010757
WBGene00004090						WBGene00010758
WBGene00004091						WBGene00010769
WBGene00004092						WBGene00010776
WBGene00004095						WBGene00010778
WBGene00004101						WBGene00010780
WBGene00004109						WBGene00010788
WBGene00004114						WBGene00010789
WBGene00004115						WBGene00010794
WBGene00004117						WBGene00010805
WBGene00004121						WBGene00010809
WBGene00004130						WBGene00010810
WBGene00004131						WBGene00010811
WBGene00004132						WBGene00010813
WBGene00004134						WBGene00010815
WBGene00004135						WBGene00010838
WBGene00004136						WBGene00010839
WBGene00004140						WBGene00010844
WBGene00004143						WBGene00010846
WBGene00004146						WBGene00010847
WBGene00004147						WBGene00010872
WBGene00004151						WBGene00010882
WBGene00004166						WBGene00010889
WBGene00004178						WBGene00010892
WBGene00004179						WBGene00010896
WBGene00004180						WBGene00010898
WBGene00004181						WBGene00010911
WBGene00004183						WBGene00010912
WBGene00004184						WBGene00010924
WBGene00004185						WBGene00010925
WBGene00004186						WBGene00010941
WBGene00004187						WBGene00010974
WBGene00004188						WBGene00010983
WBGene00004189						WBGene00010984
WBGene00004190						WBGene00010988
WBGene00004191						WBGene00011003
WBGene00004192						WBGene00011004
WBGene00004193						WBGene00011029
WBGene00004194						WBGene00011032
WBGene00004195						WBGene00011033
WBGene00004196						WBGene00011040
WBGene00004197						WBGene00011043
WBGene00004198						WBGene00011045
WBGene00004199						WBGene00011050
WBGene00004201						WBGene00011051
WBGene00004203						WBGene00011065
WBGene00004204						WBGene00011071
WBGene00004205						WBGene00011083
WBGene00004206						WBGene00011095
WBGene00004207						WBGene00011106
WBGene00004208						WBGene00011109
WBGene00004209						WBGene00011110
WBGene00004210						WBGene00011111
WBGene00004211						WBGene00011116
WBGene00004212						WBGene00011119
WBGene00004213						WBGene00011122
WBGene00004214						WBGene00011128
WBGene00004215						WBGene00011142
WBGene00004216						WBGene00011147
WBGene00004217						WBGene00011201
WBGene00004218						WBGene00011216
WBGene00004219						WBGene00011224
WBGene00004220						WBGene00011226
WBGene00004221						WBGene00011232
WBGene00004222						WBGene00011237
WBGene00004223						WBGene00011239
WBGene00004224						WBGene00011250
WBGene00004225						WBGene00011253
WBGene00004226						WBGene00011261
WBGene00004227						WBGene00011271
WBGene00004228						WBGene00011272
WBGene00004229						WBGene00011274
WBGene00004230						WBGene00011275
WBGene00004231						WBGene00011280
WBGene00004232						WBGene00011281
WBGene00004233						WBGene00011302
WBGene00004234						WBGene00011303
WBGene00004235						WBGene00011304
WBGene00004236						WBGene00011305
WBGene00004237						WBGene00011306
WBGene00004239						WBGene00011307
WBGene00004241						WBGene00011308
WBGene00004242						WBGene00011311
WBGene00004243						WBGene00011329
WBGene00004244						WBGene00011344
WBGene00004245						WBGene00011352
WBGene00004248						WBGene00011368
WBGene00004249						WBGene00011398
WBGene00004254						WBGene00011399
WBGene00004255						WBGene00011409
WBGene00004256						WBGene00011412
WBGene00004257						WBGene00011417
WBGene00004258						WBGene00011420
WBGene00004259						WBGene00011433
WBGene00004264						WBGene00011440
WBGene00004266						WBGene00011449
WBGene00004267						WBGene00011451
WBGene00004268						WBGene00011462
WBGene00004269						WBGene00011467
WBGene00004270						WBGene00011480
WBGene00004271						WBGene00011481
WBGene00004272						WBGene00011482
WBGene00004273						WBGene00011488
WBGene00004274						WBGene00011493
WBGene00004275						WBGene00011500
WBGene00004276						WBGene00011502
WBGene00004277						WBGene00011507
WBGene00004278						WBGene00011510
WBGene00004279						WBGene00011517
WBGene00004281						WBGene00011524
WBGene00004282						WBGene00011529
WBGene00004283						WBGene00011538
WBGene00004284						WBGene00011543
WBGene00004285						WBGene00011579
WBGene00004286						WBGene00011582
WBGene00004287						WBGene00011590
WBGene00004296						WBGene00011605
WBGene00004297						WBGene00011612
WBGene00004298						WBGene00011625
WBGene00004300						WBGene00011629
WBGene00004302						WBGene00011638
WBGene00004303						WBGene00011648
WBGene00004304						WBGene00011662
WBGene00004305						WBGene00011671
WBGene00004306						WBGene00011672
WBGene00004307						WBGene00011674
WBGene00004308						WBGene00011675
WBGene00004309						WBGene00011677
WBGene00004310						WBGene00011687
WBGene00004311						WBGene00011696
WBGene00004312						WBGene00011697
WBGene00004313						WBGene00011717
WBGene00004314						WBGene00011718
WBGene00004315						WBGene00011719
WBGene00004316						WBGene00011722
WBGene00004317						WBGene00011731
[truncated: 5,570 more rows]
